# Supplementary material for: Drosophila SWR1 and NuA4 complexes are defined by DOMINO isoforms
Source: eLife. 2020 May 20;9:e56325. doi: 10.7554/eLife.56325 (PMC7239659; doi:10.7554/eLife.56325)
Supplement: Source code 1. [file elife-56325-code1.r]

library(limma)

#define path where to save pdf
pdf("/path/to/pdf/volcano_plots_limma_DOM_IPs.pdf", width = 8.27, height = 11.69, useDingbats=FALSE)


#read input file - Sheet 1 (Inputed_LFQ_withMeans) of Supplementary Table 1 - remove columns AE to AP
mydata <- read.table("/path/to/DomA_vs_DomB_imputed.txt", sep = "\t", 
                   header = T,
                   na.strings = c("","NA")
)

head(mydata)
colnames(mydata)

mydata <- mydata[, c(1:27,69:72) ]

mydata$A_c_1_mean <-  rowMeans(mydata[, grep("DomA_c1_", colnames(mydata))])
mydata$A_c_2_mean <-  rowMeans(mydata[, grep("DomA_c10_", colnames(mydata))])
mydata$A_c_3_mean <-  rowMeans(mydata[, grep("DomA_c28_", colnames(mydata))])


mydata$B_c_1_mean <-  rowMeans(mydata[, grep("DomB_c1_", colnames(mydata))])
mydata$B_c_2_mean <-  rowMeans(mydata[, grep("DomB_c13_", colnames(mydata))])
mydata$B_c_3_mean <-  rowMeans(mydata[, grep("DomB_c29_", colnames(mydata))])


mydata$CTRL_c_1_mean <-  rowMeans(mydata[, grep("Ctrl_c1_", colnames(mydata))])
mydata$CTRL_c_2_mean <-  rowMeans(mydata[, grep("Ctrl_c2_", colnames(mydata))])
mydata$CTRL_c_3_mean <-  rowMeans(mydata[, grep("Ctrl_c3_", colnames(mydata))])


mydata$A_mean <- rowMeans(mydata[, 32:34 ])
mydata$B_mean <- rowMeans(mydata[, 35:37 ])
mydata$CTRL_mean <- rowMeans(mydata[, 38:40 ])


head(mydata)
colnames(mydata)


############# eBayes ###################

row.names(mydata) <- make.names(mydata[, 31], unique = TRUE) # makes rownames unique


mysub <- mydata[, 32:40]
#rownames(mysub) <- mydata$Protein.IDs
head(mysub)

genotype <- gsub("_c_[1-30]_mean", "", colnames(mysub))


my_conditions <- factor(genotype)

design <- model.matrix( ~ 0 + my_conditions ) 
colnames(design) <- levels(my_conditions)

my_contrasts <- makeContrasts( "A-CTRL",
                               "B-CTRL",
                               "A-B",
                               "(A-CTRL)-(B-CTRL)",
                               levels= design )

fit <- eBayes( contrasts.fit( lmFit( mysub, design ), my_contrasts ) )
fit$coefficients # fold change
fit$p.value


fit$q.valueA.CTRL <- p.adjust(fit$p.value[, "A-CTRL"], method = "fdr")
fit$q.valueB.CTRL <- p.adjust(fit$p.value[, "B-CTRL"], method = "fdr")
fit$q.valueAB.CTRL <- p.adjust(fit$p.value[, "A-B"], method = "fdr")
fit$q.valueActrlBctrl <- p.adjust(fit$p.value[, "(A-CTRL)-(B-CTRL)"], method = "fdr")

fit.table <- cbind(fit$coefficients, fit$p.value, fit$q.value, fit$q.valueA.CTRL, fit$q.valueB.CTRL, fit$q.valueAB.CTRL, fit$q.valueActrlBctrl)


i=1


par(mfrow=c(2,2), pty="s")

for(i in 1:ncol(my_contrasts)){
  
  plot(fit$coefficients[,i], -log10(fit$p.value[,i]), 
       xlim = c(-10, 10), 
       ylim = c(0,11), 
       cex=1,
       ylab = "-log10 (p-value)", xlab = "log2 fold-change",
       cex.axis = 1, 
       cex.lab = 1,
       tck=-.05,
       main = colnames(fit$coefficients)[i], cex.main = 1, pch=19, col="darkgrey")
  
  abline(v=0, col="gray50", lwd=1, lty=2)
  
  
  my_subset <- (p.adjust(fit$p.value[,i], method = "fdr")) <0.05 #& (fit$coefficients[,i] >0 )
  
  if(sum(my_subset) > 0){
    
    
    text(fit$coefficients[my_subset,i], -log10(fit$p.value[my_subset,i]), labels = rownames(fit)[my_subset], cex = 0.5, pos = 3, offset = -0.5,
         col ="darkred")
    
    points(fit$coefficients[my_subset,i], -log10(fit$p.value[my_subset,i]), pch=19, cex=1, col ="darkred")
    
    
    
  }
  
  
}


dev.off()
