# Supplementary material for: Drosophila SWR1 and NuA4 complexes are defined by DOMINO isoforms
Source: eLife. 2020 May 20;9:e56325. doi: 10.7554/eLife.56325 (PMC7239659; doi:10.7554/eLife.56325)
Supplement: Source code 2. [file elife-56325-code2.ijm]

title = getTitle();
origin = getDirectory("image");


run("Set Measurements...", "mean display redirect=None decimal=3");


//create ROIs for cells
run("8-bit");
run("Duplicate...", "duplicate channels=1");
run("8-bit");
run("Median...", "radius=2");
//threshold
setAutoThreshold("Huang dark");

run("Create Selection");
roiManager("Add");
run("Make Inverse");
roiManager("Add");


//create ROIs for GFP

selectWindow(title);
run("Duplicate...", "duplicate channels=2");
run("8-bit");
run("Maximum...", "radius=2");
run("Enhance Local Contrast (CLAHE)", "blocksize=127 histogram=256 maximum=3 mask=*None*");

setAutoThreshold("MaxEntropy dark");
//setThreshold(200, 255);
run("Create Selection");
roiManager("Add");

roiManager("Select",  newArray(0,2));
roiManager("AND");
roiManager("Add");
roiManager("Select", 3);
run("Make Inverse");
roiManager("Add");
roiManager("Select",  newArray(0,4));
roiManager("AND");
roiManager("Add");


//measure in the 4-channel image

selectWindow(title);


roiManager("Select", newArray(0,1,3,5));
roiManager("Multi Measure");

//save results table to same directory as image
target = origin + File.nameWithoutExtension + "_results.xls" ;
print(target)
saveAs("Results", target);


//cleaning up
//run("Close All");
//roiManager("deselect");
//roiManager("Delete");
//run("Clear Results");
