# Supplementary material for: Drosophila SWR1 and NuA4 complexes are defined by DOMINO isoforms
Source: eLife. 2020 May 20;9:e56325. doi: 10.7554/eLife.56325 (PMC7239659; doi:10.7554/eLife.56325)
Supplement: Source code 3. [file elife-56325-code3.r]

# Packages required
# install.packages("ggpubr")
# install.packages("ggsignif")
# install.packages("ggpmisc")
# install.packages("readxl")
# capabilities( )["tcktk"] 
# install.packages("data.table")
# install.packages("purrr")
# install.packages("reshape2")
# install.packages("ggplot2")
# install.packages("ggforce")
# install.packages("pheatmap")

# Load the required packages
library(tcltk) 
library(readxl)
library(ggpubr)
library(ggsignif)
library(ggpmisc)
library(data.table)
library(purrr)
library(reshape2)
library(ggplot2)
library(ggforce)
library(pheatmap)

#getwd() # Get the current working directory
setwd("/path/to/dir") # Choose the directory if the current working directory is not the one required

# data_file <- load("/Users/alessandroscacchetti/Desktop/Becker_Lab/Dom_project/Kc_RNAi/Acetylation/MS/Analysis/Ref2007_AScacchetti_d3Ac_H3H4_20181219_2.csv") # Choose the file to be used, preferable an excel file
# remove(myList)

# Load the output form Skyline - Sheet 1 of Supplementary Table 4
tab_data <- read.csv("/path/to/rawOutput_Skyline.csv", header = TRUE) 
head(tab_data) # Check if the loaded data is right by checking the first few rows

# Remove unnecessary columns
tab_data <- tab_data[, -c(2,3,6,7)]
head(tab_data)

# Remove "Normalized Area: " from Quantification column
#tab_data$Quantification <- as.factor(gsub("[^0-9\\.E+]", "", tab_data$Quantification)) 


# Change column names and remove unwanted data 
colnames(tab_data) <- c("Peptide_Name", "Protein", "Sample_Name", "Peak_Area", "Fragment_ion", "Total_Area_MS1") # Change the column names as per requirement
tab_data <- tab_data[!grepl("QC", tab_data$Sample_Name),]
tab_data <- tab_data[!grepl("blank", tab_data$Sample_Name),]
tab_data <- tab_data[!grepl("do_not_use", tab_data$Peptide_Name),]


head(tab_data)
rownames(tab_data) <- c() # Reset the row names

tab_data$Peptide_Fragment_Name <- paste(tab_data$Peptide_Name, tab_data$Fragment_ion, sep="_") # Combine information in Peptide name and Fragment ion
tab_data <- tab_data[, -c(1,5)] # Remove Peptide Name and Fragment ion column
tab_data <- tab_data[,c(5,1,2,3,4)] # Change the column order
head(tab_data)
tab_data <-tab_data[order(tab_data$Sample_Name, decreasing = FALSE),] # Arrange the data either in increase/decreasing order of either the sample or values [Change as per requirement]
rownames(tab_data) <- c() # Reset the row names
tab_data <- as.data.frame(sapply(tab_data, function(x) { gsub("[\r\n]", "", x) })) # Remove hidden \n from the Peptide_Name column
# length(unique(tab_data$Peptide_Fragment_Name))
# which(duplicated(tab_data))
# #nodup <- tab_data[!duplicated(tab_data$Peptide_Fragment_Name),]
# tab_data_2 <- tab_data[duplicated(tab_data$Peptide_Fragment_Name),]
length(unique(tab_data_2$Peptide_Fragment_Name))
length(duplicated(tab_data_2$Peptide_Fragment_Name))
tab_data$Peak_Area <- as.character(tab_data$Peak_Area) # Convert Peak Area to character
tab_data$Peak_Area <- as.numeric(tab_data$Peak_Area) # Convert Peak Area to numeric
tab_data$Total_Area_MS1 <- as.character(tab_data$Total_Area_MS1) # Convert Total MS1 area to character
tab_data$Total_Area_MS1 <- as.numeric(tab_data$Total_Area_MS1) # Convert Total MS1 area to numeric

Samples <- unique(tab_data$Sample_Name) # Get sample names

# List of H4 modifications
H4_noPTM <- list()
H4K5ac <- list()
H4K8ac <- list()
H4K12ac <- list()
H4K16ac <- list()
H4K5K8ac <- list()
H4K12K16ac <- list()
H4K5K8K12ac <- list()
H4K5K8K16ac <- list()
H4K5K12K16ac <- list()
H4K8K12K16ac <- list()
H4K5K8K12K16ac <- list()
H4K20_noPTM <- list()
H4K20me1 <- list()
H4K20me2 <- list()
H4K20me3 <- list()

# List of H3 modifications
H3K9_noPTM <- list()
H3K9ac <- list()
H3K14ac <- list()
H3K9acK14ac <- list()
H3K9me1K14ac <- list()
H3K9me2K14ac <- list()
H3K9me3K14ac <- list()
H3K9me1 <- list()
H3K9me2 <- list()
H3K9me3 <- list()
H3K18_noPTM <- list()
H3K18ac <- list()
H3K23ac <- list()
H3K18acK23ac <- list()
H3K27_noPTM <- list()
H3K27me1 <- list()
H3K27me2 <- list()
H3K27me3 <- list()
H3K36me2 <- list()
H3K36me3 <- list()
H3K27me2K36me1 <- list()
H3K27me2K36ac <- list()
H3K36me2K27ac <- list()
H3K79_noPTM <- list()
H3K79me1 <- list()
H3K79me2 <- list()
H3K4_noPTM <- list()
H3K4me1 <- list()
H3K4me2 <- list()
H3K4me3 <- list()
H3.3_noPTM <- list()
H3_Y41R49_noPTM <- list()
H3_Y54R63_noPTM <- list()

####### Not used ######
# H3K4ac <- list()
# H3K27ac <- list()
# H3K36me3K27ac <- list()
# H3K37ac <- list()
# H3K36ac <- list()
##############
remove(temp)
# temp <- tab_data[tab_data$Sample_Name==Samples[2],] # Obtain the data based on Sample names
# # # # Make the first column as rownames
# temp$Peptide_Fragment_Name <- as.character(tab_data$Total_Area_MS1)
# rownames(temp) <- temp[,1]
# temp[,1] <- NULL
#############

i=1 
for (i in 1:length(Samples)){ 
  temp <- tab_data[tab_data$Sample_Name==Samples[i],] # Obtain the data based on Sample names
  
  #temp <- temp[!duplicated(temp$Peptide_Fragment_Name),]
  #temp_2 <- temp[order(temp$Peptide_Fragment_Name, decreasing=TRUE),]
  #temp_2 <- temp_2[!duplicated(temp_2$Peak_Area),]
  # Make the first column as rownames
  rownames(temp) <- temp[,1] 
  temp[,1] <- NULL
  
  # Calculations for motifs at H4 (Feller C, et al., 2015) [NOTE: SOME FORMULAE ARE MODIFIED ACCORDING TO THE DATA AND SIGNAL FROM PEPTIDE. FOR THE COMPLETE AND ACTUAL FORMULA, CHECK Feller C, et al., 2015 [SUPPLEMENTARY]]
  
  H4_noPTM[i] <- temp["MS1_G4R17_noPTM_precursor",4]/sum(temp["MS1_G4R17_1Ac_precursor",4], temp["MS1_G4R17_2Ac_precursor",4], temp["MS1_G4R17_3Ac_precursor",4], temp["MS1_G4R17_4Ac_precursor",4], temp["MS1_G4R17_noPTM_precursor",4])
  
  H4K5ac[i] <- (temp["MS1_G4R17_1Ac_precursor",4]/sum(temp["MS1_G4R17_1Ac_precursor",4], temp["MS1_G4R17_2Ac_precursor",4], temp["MS1_G4R17_3Ac_precursor",4], temp["MS1_G4R17_4Ac_precursor",4], temp["MS1_G4R17_noPTM_precursor",4])) * 
    (1 - (temp["MS2_G4R17_1Ac_y12_K16K12K8.1Ac_1217_y12",3]/sum(temp["MS2_G4R17_1Ac_y12_K16K12K8.1Ac_1217_y12",3],temp["MS2_G4R17_1Ac_y12_K16K12K8.0Ac_1220_y12",3])))
     
  H4K8ac[i] <- (temp["MS1_G4R17_1Ac_precursor",4]/sum(temp["MS1_G4R17_1Ac_precursor",4], temp["MS1_G4R17_2Ac_precursor",4], temp["MS1_G4R17_3Ac_precursor",4], temp["MS1_G4R17_4Ac_precursor",4], temp["MS1_G4R17_noPTM_precursor",4])) * 
     (temp["MS2_G4R17_1Ac_y12_K16K12K8.1Ac_1217_y12",3]/sum(temp["MS2_G4R17_1Ac_y12_K16K12K8.1Ac_1217_y12",3],temp["MS2_G4R17_1Ac_y12_K16K12K8.0Ac_1220_y12",3]) - 
        temp["MS2_G4R17_1Ac_y7_K16K12.1Ac_760_y7",3]/sum(temp["MS2_G4R17_1Ac_y7_K16K12.1Ac_760_y7",3], temp["MS2_G4R17_1Ac_y7_K16K12.0Ac_763_y7",3]))
  
  H4K12ac[i] <- (temp["MS1_G4R17_1Ac_precursor",4]/sum(temp["MS1_G4R17_1Ac_precursor",4], temp["MS1_G4R17_2Ac_precursor",4], temp["MS1_G4R17_3Ac_precursor",4], temp["MS1_G4R17_4Ac_precursor",4],temp["MS1_G4R17_noPTM_precursor",4])) * 
    ((temp["MS2_G4R17_1Ac_y7_K16K12.1Ac_760_y7",3]/sum(temp["MS2_G4R17_1Ac_y7_K16K12.1Ac_760_y7",3],temp["MS2_G4R17_1Ac_y7_K16K12.0Ac_763_y7",3])) -
    (temp["MS2_G4R17_1Ac_y5_K16ac_530_y5",3]/sum(temp["MS2_G4R17_1Ac_y5_K16ac_530_y5",3],temp["MS2_G4R17_1Ac_y5_K16NoAc_533_y5",3])))
  
  H4K16ac[i] <- (temp["MS1_G4R17_1Ac_precursor",4]/sum(temp["MS1_G4R17_1Ac_precursor",4], temp["MS1_G4R17_2Ac_precursor",4], temp["MS1_G4R17_3Ac_precursor",4], temp["MS1_G4R17_4Ac_precursor",4],temp["MS1_G4R17_noPTM_precursor",4])) *
    (temp["MS2_G4R17_1Ac_y5_K16ac_530_y5",3]/sum(temp["MS2_G4R17_1Ac_y5_K16ac_530_y5",3],temp["MS2_G4R17_1Ac_y5_K16NoAc_533_y5",3]))
  
  H4K5K8ac[i] <- (temp["MS1_G4R17_2Ac_precursor",4]/sum(temp["MS1_G4R17_1Ac_precursor",4], temp["MS1_G4R17_2Ac_precursor",4], temp["MS1_G4R17_3Ac_precursor",4], temp["MS1_G4R17_4Ac_precursor",4],temp["MS1_G4R17_noPTM_precursor",4])) *
    (temp["MS2_G4R17_2Ac_y7_K16K12.0Ac_763_y7",3]/sum(temp["MS2_G4R17_2Ac_y7_K16K12.2Ac_757_y7",3], temp["MS2_G4R17_2Ac_y7_K16K12.1Ac_760_y7",3], temp["MS2_G4R17_2Ac_y7_K16K12.0Ac_763_y7",3]))
  
  H4K12K16ac[i] <- (temp["MS1_G4R17_2Ac_precursor",4]/sum(temp["MS1_G4R17_1Ac_precursor",4], temp["MS1_G4R17_2Ac_precursor",4], temp["MS1_G4R17_3Ac_precursor",4], temp["MS1_G4R17_4Ac_precursor",4],temp["MS1_G4R17_noPTM_precursor",4])) *
    (temp["MS2_G4R17_2Ac_y7_K16K12.2Ac_757_y7",3]/sum(temp["MS2_G4R17_2Ac_y7_K16K12.0Ac_763_y7",3], temp["MS2_G4R17_2Ac_y7_K16K12.1Ac_760_y7",3], temp["MS2_G4R17_2Ac_y7_K16K12.2Ac_757_y7",3]))
    
  H4K5K8K12ac[i] <- (temp["MS1_G4R17_3Ac_precursor",4]/sum(temp["MS1_G4R17_1Ac_precursor",4], temp["MS1_G4R17_2Ac_precursor",4], temp["MS1_G4R17_3Ac_precursor",4], temp["MS1_G4R17_4Ac_precursor",4],temp["MS1_G4R17_noPTM_precursor",4])) *
    (1-(temp["MS2_G4R17_3Ac_y5_K16ac_530_y5",3]/sum(temp["MS2_G4R17_3Ac_y5_K16ac_530_y5",3], temp["MS2_G4R17_3Ac_y5_K16NoAc_533_y5",3])))
    
  H4K5K8K16ac[i] <- (temp["MS1_G4R17_3Ac_precursor",4]/sum(temp["MS1_G4R17_1Ac_precursor",4], temp["MS1_G4R17_2Ac_precursor",4], temp["MS1_G4R17_3Ac_precursor",4], temp["MS1_G4R17_4Ac_precursor",4],temp["MS1_G4R17_noPTM_precursor",4])) *
    ((temp["MS2_G4R17_3Ac_y5_K16ac_530_y5",3]/sum(temp["MS2_G4R17_3Ac_y5_K16ac_530_y5",3], temp["MS2_G4R17_3Ac_y5_K16NoAc_533_y5",3]))-
    (temp["MS2_G4R17_3Ac_y7_K16K12.2Ac_757_y7",3]/sum(temp["MS2_G4R17_3Ac_y7_K16K12.2Ac_757_y7",3], temp["MS2_G4R17_3Ac_y7_K16K12.1Ac_760_y7",3])))
    
  H4K5K12K16ac[i] <- (temp["MS1_G4R17_3Ac_precursor",4]/sum(temp["MS1_G4R17_1Ac_precursor",4], temp["MS1_G4R17_2Ac_precursor",4], temp["MS1_G4R17_3Ac_precursor",4], temp["MS1_G4R17_4Ac_precursor",4],temp["MS1_G4R17_noPTM_precursor",4])) *
    ((temp["MS2_G4R17_3Ac_y7_K16K12.2Ac_757_y7",3]/sum(temp["MS2_G4R17_3Ac_y7_K16K12.2Ac_757_y7",3], temp["MS2_G4R17_3Ac_y7_K16K12.1Ac_760_y7",3]))-
    (temp["MS2_G4R17_3Ac_y12_K16K12K8.3Ac_1211_y12",3]/sum(temp["MS2_G4R17_3Ac_y12_K16K12K8.3Ac_1211_y12",3], temp["MS2_G4R17_3Ac_y12_K16K12K8.2Ac_1214_y12",3])))
    
  H4K8K12K16ac[i] <- (temp["MS1_G4R17_3Ac_precursor",4]/sum(temp["MS1_G4R17_1Ac_precursor",4], temp["MS1_G4R17_2Ac_precursor",4], temp["MS1_G4R17_3Ac_precursor",4], temp["MS1_G4R17_4Ac_precursor",4],temp["MS1_G4R17_noPTM_precursor",4])) *
    (temp["MS2_G4R17_3Ac_y12_K16K12K8.3Ac_1211_y12",3]/sum(temp["MS2_G4R17_3Ac_y12_K16K12K8.3Ac_1211_y12",3], temp["MS2_G4R17_3Ac_y12_K16K12K8.2Ac_1214_y12",3]))
  
  H4K5K8K12K16ac[i] <- temp["MS1_G4R17_4Ac_precursor",4]/sum(temp["MS1_G4R17_noPTM_precursor",4], temp["MS1_G4R17_1Ac_precursor",4], temp["MS1_G4R17_2Ac_precursor",4], temp["MS1_G4R17_3Ac_precursor",4], temp["MS1_G4R17_4Ac_precursor",4])
  
  ###Note for K4me3, the signal is extremely low and not that good. Hence, instead of Total MS1 area, only the precursor area is used
  
  H4K20_noPTM[i] <- temp["MS1_K20R23_noPTM_precursor",4]/sum(temp["MS1_K20R23_noPTM_precursor",4], temp["MS1_K20R23_K20me1_precursor",4], temp["MS1_K20R23_K20me2_precursor",4], temp["MS1_K20R23_K20me3_precursor",4])
  
  H4K20me1[i] <- temp["MS1_K20R23_K20me1_precursor",4]/sum(temp["MS1_K20R23_noPTM_precursor",4], temp["MS1_K20R23_K20me1_precursor",4], temp["MS1_K20R23_K20me2_precursor",4], temp["MS1_K20R23_K20me3_precursor",4])
  
  H4K20me2[i] <- temp["MS1_K20R23_K20me2_precursor",4]/sum(temp["MS1_K20R23_noPTM_precursor",4], temp["MS1_K20R23_K20me1_precursor",4], temp["MS1_K20R23_K20me2_precursor",4], temp["MS1_K20R23_K20me3_precursor",4])
  
  H4K20me3[i] <- temp["MS1_K20R23_K20me3_precursor",4]/sum(temp["MS1_K20R23_noPTM_precursor",4], temp["MS1_K20R23_K20me1_precursor",4], temp["MS1_K20R23_K20me2_precursor",4], temp["MS1_K20R23_K20me3_precursor",4])
  
  # Calculations for motifs at H3 (Feller C, et al., 2015)
  
  H3K9_noPTM[i] <- temp["MS1_K9R17_noPTM_precursor",4]/sum(temp["MS1_K9R17_noPTM_precursor",4], temp["MS1_K9R17_1Ac_precursor",4], temp["MS1_K9R17_2Ac_precursor",4], temp["MS1_K9R17_K9me1_K14ac_precursor",4], 
                                                 temp["MS1_K9R17_K9me2_K14ac_precursor",4], temp["MS1_K9R17_K9me3_K14ac_precursor",4], temp["MS1_K9R17_K9me1_precursor",4], temp["MS1_K9R17_K9me2_precursor",4], 
                                                 temp["MS1_K9R17_K9me3_precursor",4])
  
  ##### K9me1K14ac, K9me2K14ac and K9me3K14 ac values are nothing but K9me1_precursor, K9me2_precursor and K9me3_precursor #####
  
  H3K9ac[i] <- (temp["MS1_K9R17_1Ac_precursor",4]/sum(temp["MS1_K9R17_noPTM_precursor",4], temp["MS1_K9R17_1Ac_precursor",4], temp["MS1_K9R17_2Ac_precursor",4], temp["MS1_K9R17_K9me1_K14ac_precursor",4], 
                                         temp["MS1_K9R17_K9me2_K14ac_precursor",4], temp["MS1_K9R17_K9me3_K14ac_precursor",4], temp["MS1_K9R17_K9me1_precursor",4], temp["MS1_K9R17_K9me2_precursor",4], 
                                         temp["MS1_K9R17_K9me3_precursor",4])) * 
    (temp["MS2_K9R17_y7_K14noAc_731_y7",3]/sum(temp["MS2_K9R17_y7_K14noAc_731_y7",3], temp["MS2_K9R17_y7_K14ac_728_y7",3]))
  
  H3K14ac[i] <- (temp["MS1_K9R17_1Ac_precursor",4]/sum(temp["MS1_K9R17_noPTM_precursor",4], temp["MS1_K9R17_1Ac_precursor",4], temp["MS1_K9R17_2Ac_precursor",4], temp["MS1_K9R17_K9me1_K14ac_precursor",4], 
                                           temp["MS1_K9R17_K9me2_K14ac_precursor",4], temp["MS1_K9R17_K9me3_K14ac_precursor",4], temp["MS1_K9R17_K9me1_precursor",4], temp["MS1_K9R17_K9me2_precursor",4], 
                                           temp["MS1_K9R17_K9me3_precursor",4])) * 
    (temp["MS2_K9R17_y7_K14ac_728_y7",3]/sum(temp["MS2_K9R17_y7_K14noAc_731_y7",3], temp["MS2_K9R17_y7_K14ac_728_y7",3]))
  
  H3K9acK14ac[i] <- temp["MS1_K9R17_2Ac_precursor", 4]/sum(temp["MS1_K9R17_noPTM_precursor",4], temp["MS1_K9R17_1Ac_precursor",4], temp["MS1_K9R17_2Ac_precursor",4], temp["MS1_K9R17_K9me1_K14ac_precursor",4], 
                                                        temp["MS1_K9R17_K9me2_K14ac_precursor",4], temp["MS1_K9R17_K9me3_K14ac_precursor",4], temp["MS1_K9R17_K9me1_precursor",4], temp["MS1_K9R17_K9me2_precursor",4], 
                                                        temp["MS1_K9R17_K9me3_precursor",4])
  
  H3K9me1K14ac[i] <- temp["MS1_K9R17_K9me1_K14ac_precursor",4]/sum(temp["MS1_K9R17_noPTM_precursor",4], temp["MS1_K9R17_1Ac_precursor",4], temp["MS1_K9R17_2Ac_precursor",4], temp["MS1_K9R17_K9me1_K14ac_precursor",4], 
                                                   temp["MS1_K9R17_K9me2_K14ac_precursor",4], temp["MS1_K9R17_K9me3_K14ac_precursor",4], temp["MS1_K9R17_K9me1_precursor",4], temp["MS1_K9R17_K9me2_precursor",4], 
                                                   temp["MS1_K9R17_K9me3_precursor",4])
  
  H3K9me2K14ac[i] <- temp["MS1_K9R17_K9me2_K14ac_precursor",4]/sum(temp["MS1_K9R17_noPTM_precursor",4], temp["MS1_K9R17_1Ac_precursor",4], temp["MS1_K9R17_2Ac_precursor",4], temp["MS1_K9R17_K9me1_K14ac_precursor",4], 
                                                         temp["MS1_K9R17_K9me2_K14ac_precursor",4], temp["MS1_K9R17_K9me3_K14ac_precursor",4], temp["MS1_K9R17_K9me1_precursor",4], temp["MS1_K9R17_K9me2_precursor",4], 
                                                         temp["MS1_K9R17_K9me3_precursor",4])
  
  H3K9me3K14ac[i] <- temp["MS1_K9R17_K9me3_K14ac_precursor",4]/sum(temp["MS1_K9R17_noPTM_precursor",4], temp["MS1_K9R17_1Ac_precursor",4], temp["MS1_K9R17_2Ac_precursor",4], temp["MS1_K9R17_K9me1_K14ac_precursor",4], 
                                                         temp["MS1_K9R17_K9me2_K14ac_precursor",4], temp["MS1_K9R17_K9me3_K14ac_precursor",4], temp["MS1_K9R17_K9me1_precursor",4], temp["MS1_K9R17_K9me2_precursor",4], 
                                                         temp["MS1_K9R17_K9me3_precursor",4])
  
  H3K9me1[i] <- temp["MS1_K9R17_K9me1_precursor",4]/sum(temp["MS1_K9R17_noPTM_precursor",4], temp["MS1_K9R17_1Ac_precursor",4], temp["MS1_K9R17_2Ac_precursor",4], temp["MS1_K9R17_K9me1_K14ac_precursor",4], 
                                                    temp["MS1_K9R17_K9me2_K14ac_precursor",4], temp["MS1_K9R17_K9me3_K14ac_precursor",4], temp["MS1_K9R17_K9me1_precursor",4], temp["MS1_K9R17_K9me2_precursor",4], 
                                                    temp["MS1_K9R17_K9me3_precursor",4])
  
  H3K9me2[i] <- temp["MS1_K9R17_K9me2_precursor",4]/sum(temp["MS1_K9R17_noPTM_precursor",4], temp["MS1_K9R17_1Ac_precursor",4], temp["MS1_K9R17_2Ac_precursor",4], temp["MS1_K9R17_K9me1_K14ac_precursor",4], 
                                              temp["MS1_K9R17_K9me2_K14ac_precursor",4], temp["MS1_K9R17_K9me3_K14ac_precursor",4], temp["MS1_K9R17_K9me1_precursor",4], temp["MS1_K9R17_K9me2_precursor",4], 
                                              temp["MS1_K9R17_K9me3_precursor",4])
  
  H3K9me3[i] <- temp["MS1_K9R17_K9me3_precursor",4]/sum(temp["MS1_K9R17_noPTM_precursor",4], temp["MS1_K9R17_1Ac_precursor",4], temp["MS1_K9R17_2Ac_precursor",4], temp["MS1_K9R17_K9me1_K14ac_precursor",4], 
                                              temp["MS1_K9R17_K9me2_K14ac_precursor",4], temp["MS1_K9R17_K9me3_K14ac_precursor",4], temp["MS1_K9R17_K9me1_precursor",4], temp["MS1_K9R17_K9me2_precursor",4], 
                                              temp["MS1_K9R17_K9me3_precursor",4])
  
  H3K18_noPTM[i] <- temp["MS1_K18R26_noPTM_precursor",4]/sum(temp["MS1_K18R26_1Ac_precursor",4], temp["MS1_K18R26_2Ac_precursor",4], temp["MS1_K18R26_noPTM_precursor",4])
  
  H3K18ac[i] <- temp["MS1_K18R26_noPTM_precursor",4]/sum(temp["MS1_K18R26_1Ac_precursor",4], temp["MS1_K18R26_2Ac_precursor",4], temp["MS1_K18R26_noPTM_precursor",4]) *
    temp["MS2_K18R26_b2_K18ac_299_b2",3]/sum(temp["MS2_K18R26_b2_K18ac_299_b2",3], temp["MS2_K18R26_b2_K18noAc_302_b2",3])
  
  H3K23ac[i] <- temp["MS1_K18R26_noPTM_precursor",4]/sum(temp["MS1_K18R26_1Ac_precursor",4], temp["MS1_K18R26_2Ac_precursor",4], temp["MS1_K18R26_noPTM_precursor",4]) *
    temp["MS2_K18R26_b2_K18noAc_302_b2",3]/sum(temp["MS2_K18R26_b2_K18ac_299_b2",3], temp["MS2_K18R26_b2_K18noAc_302_b2",3])
  
  H3K18acK23ac[i] <- temp["MS1_K18R26_2Ac_precursor",4]/sum(temp["MS1_K18R26_1Ac_precursor",4], temp["MS1_K18R26_2Ac_precursor",4], temp["MS1_K18R26_noPTM_precursor",4])
  
##### MS1_K27R40_1Ac and MS1_L36me3K27ac signal were not good and hence excluded ###### Therefore, H3K27, K3K36 and H3K37ac are not used #########
  
  H3K27_noPTM[i] <- temp["MS1_K27R40_noPTM_precursor",4]/sum(temp["MS1_K27R40_noPTM_precursor",4], temp["MS1_K27R40_K27me1_precursor",4], temp["MS1_K27R40_K27me2_precursor",4], temp["MS1_K27R40_K27me3_precursor",4],
                                                   temp["MS1_K27R40_K27me2K36me1_precursor",4], temp["MS1_K27R40_K36me2_precursor",4], temp["MS1_K27R40_K36me3_precursor",4], temp["MS1_K27R40_K27me2_K36ac_precursor",4])

  H3K27me1[i] <- temp["MS1_K27R40_K27me1_precursor",4]/sum(temp["MS1_K27R40_noPTM_precursor",4], temp["MS1_K27R40_K27me1_precursor",4], temp["MS1_K27R40_K27me2_precursor",4], temp["MS1_K27R40_K27me3_precursor",4],
                                                temp["MS1_K27R40_K27me2K36me1_precursor",4], temp["MS1_K27R40_K36me2_precursor",4], temp["MS1_K27R40_K36me3_precursor",4], temp["MS1_K27R40_K27me2_K36ac_precursor",4]
                                                )

  H3K27me2[i] <- temp["MS1_K27R40_K27me2_precursor",4]/sum(temp["MS1_K27R40_noPTM_precursor",4], temp["MS1_K27R40_K27me1_precursor",4], temp["MS1_K27R40_K27me2_precursor",4], temp["MS1_K27R40_K27me3_precursor",4],
                                                 temp["MS1_K27R40_K27me2K36me1_precursor",4], temp["MS1_K27R40_K36me2_precursor",4], temp["MS1_K27R40_K36me3_precursor",4], temp["MS1_K27R40_K27me2_K36ac_precursor",4])

  H3K27me3[i] <-temp["MS1_K27R40_K27me3_precursor",4]/sum(temp["MS1_K27R40_noPTM_precursor",4], temp["MS1_K27R40_K27me1_precursor",4], temp["MS1_K27R40_K27me2_precursor",4], temp["MS1_K27R40_K27me3_precursor",4],
                                                temp["MS1_K27R40_K27me2K36me1_precursor",4], temp["MS1_K27R40_K36me2_precursor",4], temp["MS1_K27R40_K36me3_precursor",4], temp["MS1_K27R40_K27me2_K36ac_precursor",4]
                                                )

  H3K36me2[i] <- temp["MS1_K27R40_K36me2_precursor",4]/sum(temp["MS1_K27R40_noPTM_precursor",4], temp["MS1_K27R40_K27me1_precursor",4], temp["MS1_K27R40_K27me2_precursor",4], temp["MS1_K27R40_K27me3_precursor",4],
                                                temp["MS1_K27R40_K27me2K36me1_precursor",4], temp["MS1_K27R40_K36me2_precursor",4], temp["MS1_K27R40_K36me3_precursor",4], temp["MS1_K27R40_K27me2_K36ac_precursor",4]
                                                )

  H3K36me3[i] <- temp["MS1_K27R40_K36me3_precursor",4]/sum(temp["MS1_K27R40_noPTM_precursor",4], temp["MS1_K27R40_K27me1_precursor",4], temp["MS1_K27R40_K27me2_precursor",4], temp["MS1_K27R40_K27me3_precursor",4],
                                                          temp["MS1_K27R40_K27me2K36me1_precursor",4], temp["MS1_K27R40_K36me2_precursor",4], temp["MS1_K27R40_K36me3_precursor",4], temp["MS1_K27R40_K27me2_K36ac_precursor",4]
                                                          )

  H3K27me2K36me1[i] <- temp["MS1_K27R40_K27me2K36me1_precursor",4]/sum(temp["MS1_K27R40_noPTM_precursor",4], temp["MS1_K27R40_K27me1_precursor",4], temp["MS1_K27R40_K27me2_precursor",4], temp["MS1_K27R40_K27me3_precursor",4],
                                                               temp["MS1_K27R40_K27me2K36me1_precursor",4], temp["MS1_K27R40_K36me2_precursor",4], temp["MS1_K27R40_K36me3_precursor",4], temp["MS1_K27R40_K27me2_K36ac_precursor",4]
                                                               )
  
  #### MS1_K27R40_K27me2_K36ac and MS1_K27R40_K36me2_K27ac also doesn't look that reliable. So in case there are some issues with calculations, remove it from the analysis from every formula ####

  H3K27me2K36ac[i] <- temp["MS1_K27R40_K27me2_K36ac_precursor",4]/sum(temp["MS1_K27R40_noPTM_precursor",4], temp["MS1_K27R40_K27me1_precursor",4], temp["MS1_K27R40_K27me2_precursor",4], temp["MS1_K27R40_K27me3_precursor",4],
                                                            temp["MS1_K27R40_K27me2K36me1_precursor",4], temp["MS1_K27R40_K36me2_precursor",4], temp["MS1_K27R40_K36me3_precursor",4], temp["MS1_K27R40_K27me2_K36ac_precursor",4]
                                                            )

  H3K36me2K27ac[i] <- temp["MS1_K27R40_K36me2_K27ac_precursor",4]/sum(temp["MS1_K27R40_noPTM_precursor",4], temp["MS1_K27R40_K27me1_precursor",4], temp["MS1_K27R40_K27me2_precursor",4], temp["MS1_K27R40_K27me3_precursor",4],
                                                            temp["MS1_K27R40_K27me2K36me1_precursor",4], temp["MS1_K27R40_K36me2_precursor",4], temp["MS1_K27R40_K36me3_precursor",4], temp["MS1_K27R40_K27me2_K36ac_precursor",4],
                                                            temp["MS1_K27R40_K36me2_K27ac_precursor",4])

    #### Note for K79me3, the signal is bad and not reliable. Hence it has been excluded
  
  H3K79_noPTM[i] <- temp["MS1_E73R83_noPTM_precursor",4]/sum(temp["MS1_E73R83_noPTM_precursor",4], temp["MS1_E73R83_K79me1_precursor",4], temp["MS1_E73R83_K79me2_precursor",4])
  
  H3K79me1[i] <- temp["MS1_E73R83_K79me1_precursor",4]/sum(temp["MS1_E73R83_noPTM_precursor",4], temp["MS1_E73R83_K79me1_precursor",4], temp["MS1_E73R83_K79me2_precursor",4])
  
  H3K79me2[i] <- temp["MS1_E73R83_K79me2_precursor",4]/sum(temp["MS1_E73R83_noPTM_precursor",4], temp["MS1_E73R83_K79me1_precursor",4], temp["MS1_E73R83_K79me2_precursor",4])
  
  ###Note for K4me3, the signal is extremely low and not that good. Hence, instead of Total MS1 area, only the precursor area is used
  
  H3K4_noPTM[i] <- temp["MS1_T3R8_NoPTM_precursor",4]/sum(temp["MS1_T3R8_NoPTM_precursor",4], temp["MS1_T3R8_K4me1_precursor",4], temp["MS1_T3R8_K4me2_precursor",4], temp["MS1_T3R8_K4me3_only_precursor_precursor",3])
  
  H3K4me1[i] <-  temp["MS1_T3R8_K4me1_precursor",4]/sum(temp["MS1_T3R8_NoPTM_precursor",4], temp["MS1_T3R8_K4me1_precursor",4], temp["MS1_T3R8_K4me2_precursor",4], temp["MS1_T3R8_K4me3_only_precursor_precursor",3])
  
  H3K4me2[i] <- temp["MS1_T3R8_K4me2_precursor",4]/sum(temp["MS1_T3R8_NoPTM_precursor",4], temp["MS1_T3R8_K4me1_precursor",4], temp["MS1_T3R8_K4me2_precursor",4], temp["MS1_T3R8_K4me3_only_precursor_precursor",3])
  
  H3K4me3[i] <-  temp["MS1_T3R8_K4me3_only_precursor_precursor",3]/sum(temp["MS1_T3R8_NoPTM_precursor",4], temp["MS1_T3R8_K4me1_precursor",4], temp["MS1_T3R8_K4me2_precursor",4], temp["MS1_T3R8_K4me3_only_precursor_precursor",3]) ### For K4me3, check if the signal is good enough to be used for the analysis, if not, DO NOT use it all!! ####
  
  H3.3_noPTM[i] <- temp["MS1_H3.3_K27R40_noPTM_precursor",4]
  
  H3_Y41R49_noPTM[i] <- temp["MS1_Y41R49_noPTM_precursor",4]
  
  ###Note for Y54R64_1Ac, the signal is bad and not reliable. Hence, it has been excluded
  
  H3_Y54R63_noPTM[i] <- temp["MS1_Y54R63_noPTM_precursor",4]
  
  ############################################ Not used ####################################################
  
  # H3K27ac[i] <- temp["MS1_K27R40_noPTM",4]/sum(temp["MS1_K27R40_noPTM",4], temp["MS1_K27R40_1Ac",4], temp["MS1_K27R40_K27me1",4], temp["MS1_K27R40_K27me2",4], temp["MS1_K27R40_K27me3",4],
  #                                              temp["MS1_K27R40_K27me2K36me1",4], temp["MS1_K27R40_K36me2_NOT USED",4], temp["MS1_K27R40_K36me3_NOT USED",4], temp["MS1_K27R40_K27me2_K36ac",4],
  #                                              temp["MS1_K27R40_K36me2_K27ac_NOT USED",4], temp["MS1_K27R40_K36me3_K27ac_NOT USED",4]) *
  #   (1 - ave((temp["MS2_K27R40_y5_K27NoAc_752",4]/sum(temp["MS2_K27R40_y5_K27NoAc_752",4], temp["MS2_K27R40_y5_K27ac_755",4])), temp["MS2_K27R40_b3_K27NoAc_332",4]/sum(temp["MS2_K27R40_b3_K27NoAc_332",4], temp["MS2_K27R40_b3_K27ac_329",4])))
  
  #WH3K36ac[i] <-
  
  #H3K37ac[i] <-
  
  # H3K36me3K27ac[i] <- temp["MS1_K27R40_K36me3_K27ac_NOT USED",4]/sum(temp["MS1_K27R40_noPTM",4], temp["MS1_K27R40_K27me1",4], temp["MS1_K27R40_K27me2",4], temp["MS1_K27R40_K27me3",4],
  #                                                                    temp["MS1_K27R40_K27me2K36me1",4], temp["MS1_K27R40_K36me2_NOT USED",4], temp["MS1_K27R40_K36me3_NOT USED",4], temp["MS1_K27R40_K27me2_K36ac",4],
  #                                                                    temp["MS1_K27R40_K36me2_K27ac_NOT USED",4], temp["MS1_K27R40_K36me3_K27ac_NOT USED",4])
  
  # H3K4ac[i] <- temp["MS1_T3R8_K4ac_precursor",4]/sum(temp["MS1_T3R8_NoPTM_precursor",4], temp["MS1_T3R8_K4ac_precursor",4], temp["MS1_T3R8_K4me1_precursor",4], temp["MS1_T3R8_K4me2_precursor",4], temp["MS1_T3R8_K4me3_precursor",3])
  
  ###########################################################################################################
  
}

# Rename the items in the list

# H4 modifications
names(H4_noPTM) <- Samples
names(H4K5ac) <- Samples
names(H4K8ac) <- Samples
names(H4K12ac) <- Samples
names(H4K16ac) <- Samples
names(H4K5K8ac) <- Samples
names(H4K12K16ac) <- Samples
names(H4K5K8K12ac) <- Samples
names(H4K5K8K16ac) <- Samples
names(H4K5K12K16ac) <- Samples
names(H4K8K12K16ac) <- Samples
names(H4K5K8K12K16ac) <- Samples
names(H4K20_noPTM) <- Samples
names(H4K20me1) <- Samples
names(H4K20me2) <- Samples
names(H4K20me3) <- Samples

# H3 modifications
names(H3K9_noPTM) <- Samples
names(H3K9ac) <- Samples
names(H3K14ac) <- Samples
names(H3K9acK14ac) <- Samples
names(H3K9me1K14ac) <- Samples
names(H3K9me2K14ac) <- Samples
names(H3K9me3K14ac) <- Samples
names(H3K9me1) <- Samples
names(H3K9me2) <- Samples
names(H3K9me3) <- Samples
names(H3K18_noPTM) <- Samples
names(H3K18ac) <- Samples
names(H3K23ac) <- Samples
names(H3K18acK23ac) <- Samples
names(H3K27_noPTM) <- Samples
names(H3K27me1) <- Samples
names(H3K27me2) <- Samples
names(H3K27me3) <- Samples
names(H3K36me2) <- Samples
names(H3K36me3) <- Samples
names(H3K27me2K36me1) <- Samples
names(H3K27me2K36ac) <- Samples
names(H3K36me2K27ac) <- Samples
names(H3K79_noPTM) <- Samples
names(H3K79me1) <- Samples
names(H3K79me2) <- Samples
names(H3K4_noPTM) <- Samples
names(H3K4me1) <- Samples
names(H3K4me2) <- Samples
names(H3K4me3) <- Samples
names(H3.3_noPTM) <- Samples
names(H3_Y41R49_noPTM) <- Samples
names(H3_Y54R63_noPTM) <- Samples

########## Not used #############
# names(H3K4ac) <- Samples
# names(H3K36me3K27ac) <- Samples
# names(H3K27ac) <- Samples
# names(H3K36ac) <- Samples
# names(H3K37ac) <- Samples
#################################

myList <- Filter(function(x) is(x, "list"), mget(ls())) # Convert all the lists in the environment to nested list

result.df <- map_df(myList, ~data.frame("Sample" = .x), .id="Histone Modifications") # Convert the list with names to dataframe

#result.df <- result.df[,c(1,2,4,5,6,7,8,9,10,11,3)] # Change the column order

colnames(result.df) <- c("Histone_modifications", 
                         "CTRL_1",
                         "H2Av_1",
                         "AB_1",
                         "A_1",
                         "Tip60_1",
                         "CTRL_2",
                         "H2Av_2",
                         "AB_2",
                         "A_2",
                         "B_2",
                         "Tip60_2",
                         "CTRL_3",
                         "H2Av_3",
                         "AB_3",
                         "A_3",
                         "B_3",
                         "Tip60_3",
                         "CTRL_4",
                         "H2Av_4",
                         "AB_4",
                         "A_4",
                         "B_4",
                         "Tip60_4",
                         "30min_2",
                         "15min_1",
                         "30min_1",
                         "1h_1",
                         "2h_1",
                         "5h_1",
                         "CTRL_Z_2",
                         "15min_2",
                         "CTRL_Z_1",
                         "1h_2",
                         "2h_2",
                         "5h_2"
                         
                        )


final.df <- result.df[complete.cases(result.df), ]
head(final.df)

final_ordered.df <- final.df[, c(1,2,7,13,19,3,8,14,20,4,9,15,21,5,10,16,22,11,17,23,6,12,18,24,33,31,26,32,27,25,28,34,29,35,30,36) ]
head(final_ordered.df)

write.csv(x = final_ordered.df, file = "quantification.csv")
