# Supplementary material for: Drosophila SWR1 and NuA4 complexes are defined by DOMINO isoforms
Source: eLife. 2020 May 20;9:e56325. doi: 10.7554/eLife.56325 (PMC7239659; doi:10.7554/eLife.56325)
Supplement: Source code 4. [file elife-56325-code4.r]

# install.packages("pheatmap")
# install.packages("RColorBrewer")

library(pheatmap)
library(RColorBrewer)


pdf("/path/to/pdf/plot_histone_modifications.pdf", width = 8.27, height = 11.69, pointsize = 24, useDingbats=FALSE)


###########################################  Not Scaled  ###########################################

#read table from Sheet #2 of Supplementary Table 4 (QuantMOD)
my_data <- read.csv("path/to/QuantMOD.csv", header = TRUE) 

row.names(my_data) <- my_data$Histone_modifications
head(my_data)
my_data <- my_data[ ,c(3:10, 15:25)]


#se <- function(x) sd(x)/length(x-1)

se <- function(x) sd(x)/sqrt(length(x))

my_data$Mean_CTRL <-  rowMeans(my_data[, grep("^CTRL", colnames(my_data))])

my_data$Mean_H2Av <-  rowMeans(my_data[, grep("^H2Av", colnames(my_data))])

#my_data$Mean_AB <-  rowMeans(my_data[, grep("^AB", colnames(my_data))])

my_data$Mean_A <-  rowMeans(my_data[, grep("^A", colnames(my_data))])

my_data$Mean_B <-  rowMeans(my_data[, grep("^B", colnames(my_data))])

my_data$Mean_Tip60 <-  rowMeans(my_data[, grep("^Tip60", colnames(my_data))])


my_data$SE_CTRL <-  apply(as.matrix(my_data[, 1:4]), 1, se)
my_data$SE_H2Av <-  apply(as.matrix(my_data[, 5:8]), 1, se)
#my_data$SE_AB <-  apply(as.matrix(my_data[, 9:12]), 1, se)
my_data$SE_A <-  apply(as.matrix(my_data[, 9:12]), 1, se)
my_data$SE_B <-  apply(as.matrix(my_data[, 13:15]), 1, se)
my_data$SE_Tip60 <-  apply(as.matrix(my_data[, 16:19]), 1, se)

head(my_data)


#summary(my_data)


#my_data_norm <- my_data - rowMeans(my_data)


#write.csv(x = my_data, file = "quantification_31-01-19_with_zisis_complete_mean_SE.csv")


###########for H4 #############

#my_data <- my_data - rowMeans(my_data)


H4 <- my_data[grep("^H4", rownames(my_data)),]
H4_no_unmod <- H4[!grepl("noPTM", rownames(H4)),] 
H4_Ac <- H4_no_unmod[!grepl("me", rownames(H4_no_unmod)),] 
H4_me <- H4_no_unmod[!grepl("ac", rownames(H4_no_unmod)),] 

H3 <- my_data[grep("^H3", rownames(my_data)),]
H3_no_unmod <- H3[!grepl("noPTM", rownames(H3)),] 
H3_Ac <- H3_no_unmod[!grepl("me", rownames(H3_no_unmod)),] 
H3_me <- H3_no_unmod[!grepl("ac", rownames(H3_no_unmod)),] 

# H4_mean <- H4[,20:24]
# H3_mean <- H4[,20:24]


H4_Ac.mat <- data.matrix(H4_Ac[, 1:19])
H4_Ac_mean.mat <- data.matrix(H4_Ac[, 20:24])
H4_me.mat <- data.matrix(H4_me[, 1:19])
H4_me_mean.mat <- data.matrix(H4_me[, 20:24])

H3_Ac.mat <- data.matrix(H3_Ac[, 1:19])
H3_Ac_mean.mat <- data.matrix(H3_Ac[, 20:24])
H3_me.mat <- data.matrix(H3_me[, 1:19])
H3_me_mean.mat <- data.matrix(H3_me[, 20:24])
# 
# opar <- par()


######## clustered heatmaps ########

pheatmap(H4_Ac.mat, main = "H4 tail - Ac",
         cellwidth = 15, cellheight = 15,
         #cluster_cols = FALSE,
         clustering_distance_rows = "euclidean",
         clustering_distance_cols = "euclidean",
         clustering_method =  "complete",
         color = colorRampPalette(brewer.pal(11, "Blues"))(101),
         #breaks = seq(-1,1, length.out = 101),
         fontsize = 22, fontsize_col = 14, fontsize_row = 14) 

pheatmap(H4_me.mat, main = "H4 tail - Me", 
         cellwidth = 15, cellheight = 15,
         #cluster_cols = FALSE,
         clustering_distance_rows = "euclidean",
         clustering_distance_cols = "euclidean",
         clustering_method =  "complete",
         color = colorRampPalette(brewer.pal(11, "Blues"))(101), 
         #breaks = seq(-1,1, length.out = 101),
         fontsize = 22, fontsize_col = 14, fontsize_row = 14) 


pheatmap(H3_Ac.mat, main = "H3 tail - Ac",
         cellwidth = 15, cellheight = 15,
         #cluster_cols = FALSE,
         clustering_distance_rows = "euclidean",
         clustering_distance_cols = "euclidean",
         clustering_method =  "complete",
         color = colorRampPalette(brewer.pal(11, "Blues"))(101), 
         #breaks = seq(-1,1, length.out = 101),
         fontsize = 22, fontsize_col = 14, fontsize_row = 14) 

pheatmap(H3_me.mat, main = "H3 tail - Me",
         cellwidth = 15, cellheight = 15,
         #cluster_cols = FALSE,
         clustering_distance_rows = "euclidean",
         clustering_distance_cols = "euclidean",
         clustering_method =  "complete",
         color = colorRampPalette(brewer.pal(11, "Blues"))(101), 
         #breaks = seq(-1,1, length.out = 101),
         fontsize = 22, fontsize_col = 14, fontsize_row = 14) 


#means#

pheatmap(H4_Ac_mean.mat, main = "H4 tail - Ac", 
         cellwidth = 15, cellheight = 15,
         #cluster_cols = FALSE,
         clustering_distance_rows = "euclidean",
         clustering_distance_cols = "euclidean",
         clustering_method =  "complete",
         color = colorRampPalette(brewer.pal(11, "Blues"))(101), 
         #breaks = seq(-1,1, length.out = 101),
         fontsize = 22, fontsize_col = 14, fontsize_row = 14) 

pheatmap(H4_me_mean.mat, main = "H4 tail - Me", 
         cellwidth = 15, cellheight = 15,
         #cluster_cols = FALSE,
         clustering_distance_rows = "euclidean",
         clustering_distance_cols = "euclidean",
         clustering_method =  "complete",
         color = colorRampPalette(brewer.pal(11, "Blues"))(101), 
         #breaks = seq(-1,1, length.out = 101),
         fontsize = 22, fontsize_col = 14, fontsize_row = 14) 


pheatmap(H3_Ac_mean.mat, main = "H3 tail - Ac",
         cellwidth = 15, cellheight = 15,
         #cluster_cols = FALSE,
         clustering_distance_rows = "euclidean",
         clustering_distance_cols = "euclidean",
         clustering_method =  "complete",
         color = colorRampPalette(brewer.pal(11, "Blues"))(101), 
         #breaks = seq(-1,1, length.out = 101),
         fontsize = 22, fontsize_col = 14, fontsize_row = 14) 

pheatmap(H3_me_mean.mat, main = "H3 tail - Me", 
         cellwidth = 15, cellheight = 15,
         #cluster_cols = FALSE,
         clustering_distance_rows = "euclidean",
         clustering_distance_cols = "euclidean",
         clustering_method =  "complete",
         color = colorRampPalette(brewer.pal(11, "Blues"))(101), 
         #breaks = seq(-1,1, length.out = 101),
         fontsize = 22, fontsize_col = 14, fontsize_row = 14) 


######## barplots ########

par(mfrow=c(2,2), pch=20, pty="s", cex.axis = 0.3, cex.lab = 0.2, las = 3)


H4K5Ac <- H4_Ac[grep("H4K5ac", rownames(H4_Ac)),] 
barCenters <- barplot(as.matrix(H4K5Ac[, c(20:24)]), main="H4K5ac", ylim = c(0, 0.08))

segments(barCenters, as.matrix(H4K5Ac[, c(20:24)]) - as.matrix(H4K5Ac[, c(25:29)]), barCenters,
         as.matrix(H4K5Ac[, c(20:24)]) + as.matrix(H4K5Ac[, c(25:29)]), lwd = 1.5)

arrows(barCenters, as.matrix(H4K5Ac[, c(20:24)]) - as.matrix(H4K5Ac[, c(25:29)]), barCenters,
       as.matrix(H4K5Ac[, c(20:24)]) + as.matrix(H4K5Ac[, c(25:29)]), lwd = 1.5, angle = 90,
       code = 3, length = 0.05)


H4K8Ac <- H4_Ac[grep("H4K8ac", rownames(H4_Ac)),] 
barCenters <- barplot(as.matrix(H4K8Ac[, c(20:24)]), main="H4K8ac", ylim = c(0, 0.08))

segments(barCenters, as.matrix(H4K8Ac[, c(20:24)]) - as.matrix(H4K8Ac[, c(25:29)]), barCenters,
         as.matrix(H4K8Ac[, c(20:24)]) + as.matrix(H4K8Ac[, c(25:29)]), lwd = 1.5)

arrows(barCenters, as.matrix(H4K8Ac[, c(20:24)]) - as.matrix(H4K8Ac[, c(25:29)]), barCenters,
       as.matrix(H4K8Ac[, c(20:24)]) + as.matrix(H4K8Ac[, c(25:29)]), lwd = 1.5, angle = 90,
       code = 3, length = 0.05)


H4K12Ac <- H4_Ac[grep("H4K12ac", rownames(H4_Ac)),] 
barCenters <- barplot(as.matrix(H4K12Ac[, c(20:24)]), main="H4K12ac", ylim = c(0, 0.08))

segments(barCenters, as.matrix(H4K12Ac[, c(20:24)]) - as.matrix(H4K12Ac[, c(25:29)]), barCenters,
         as.matrix(H4K12Ac[, c(20:24)]) + as.matrix(H4K12Ac[, c(25:29)]), lwd = 1.5)

arrows(barCenters, as.matrix(H4K12Ac[, c(20:24)]) - as.matrix(H4K12Ac[, c(25:29)]), barCenters,
       as.matrix(H4K12Ac[, c(20:24)]) + as.matrix(H4K12Ac[, c(25:29)]), lwd = 1.5, angle = 90,
       code = 3, length = 0.05)


H4K16Ac <- H4_Ac[grep("H4K16ac", rownames(H4_Ac)),] 
barCenters <- barplot(as.matrix(H4K16Ac[, c(20:24)]), main="H4K16ac", ylim = c(0, 0.08))

segments(barCenters, as.matrix(H4K16Ac[, c(20:24)]) - as.matrix(H4K16Ac[, c(25:29)]), barCenters,
         as.matrix(H4K16Ac[, c(20:24)]) + as.matrix(H4K16Ac[, c(25:29)]), lwd = 1.5)

arrows(barCenters, as.matrix(H4K16Ac[, c(20:24)]) - as.matrix(H4K16Ac[, c(25:29)]), barCenters,
       as.matrix(H4K16Ac[, c(20:24)]) + as.matrix(H4K16Ac[, c(25:29)]), lwd = 1.5, angle = 90,
       code = 3, length = 0.05)


H3K27me1 <- H3_me[grep("H3K27me1", rownames(H3_me)),] 
barCenters <- barplot(as.matrix(H3K27me1[, c(20:24)]), main="H3K27me1", ylim = c(0, 0.12))

segments(barCenters, as.matrix(H3K27me1[, c(20:24)]) - as.matrix(H3K27me1[, c(25:29)]), barCenters,
         as.matrix(H3K27me1[, c(20:24)]) + as.matrix(H3K27me1[, c(25:29)]), lwd = 1.5)

arrows(barCenters, as.matrix(H3K27me1[, c(20:24)]) - as.matrix(H3K27me1[, c(25:29)]), barCenters,
       as.matrix(H3K27me1[, c(20:24)]) + as.matrix(H3K27me1[, c(25:29)]), lwd = 1.5, angle = 90,
       code = 3, length = 0.05)

H3K27me2 <- H3_me[grep("H3K27me2$", rownames(H3_me)),] 
barCenters <- barplot(as.matrix(H3K27me2[, c(20:24)]), main="H3K27me2", ylim = c(0, 0.6))

segments(barCenters, as.matrix(H3K27me2[, c(20:24)]) - as.matrix(H3K27me2[, c(25:29)]), barCenters,
         as.matrix(H3K27me2[, c(20:24)]) + as.matrix(H3K27me2[, c(25:29)]), lwd = 1.5)

arrows(barCenters, as.matrix(H3K27me2[, c(20:24)]) - as.matrix(H3K27me2[, c(25:29)]), barCenters,
       as.matrix(H3K27me2[, c(20:24)]) + as.matrix(H3K27me2[, c(25:29)]), lwd = 1.5, angle = 90,
       code = 3, length = 0.05)


H3K27me3 <- H3_me[grep("H3K27me3$", rownames(H3_me)),] 
barCenters <- barplot(as.matrix(H3K27me3[, c(20:24)]), main="H3K27me3", ylim = c(0, 0.4))

segments(barCenters, as.matrix(H3K27me3[, c(20:24)]) - as.matrix(H3K27me3[, c(25:29)]), barCenters,
         as.matrix(H3K27me3[, c(20:24)]) + as.matrix(H3K27me3[, c(25:29)]), lwd = 1.5)

arrows(barCenters, as.matrix(H3K27me3[, c(20:24)]) - as.matrix(H3K27me3[, c(25:29)]), barCenters,
       as.matrix(H3K27me3[, c(20:24)]) + as.matrix(H3K27me3[, c(25:29)]), lwd = 1.5, angle = 90,
       code = 3, length = 0.05)                

H3K9me3 <- H3_me[grep("H3K9me3$", rownames(H3_me)),] 
barCenters <- barplot(as.matrix(H3K9me3[, c(20:24)]), main="H3K9me3", ylim = c(0, 0.08))

segments(barCenters, as.matrix(H3K9me3[, c(20:24)]) - as.matrix(H3K9me3[, c(25:29)]), barCenters,
         as.matrix(H3K9me3[, c(20:24)]) + as.matrix(H3K9me3[, c(25:29)]), lwd = 1.5)

arrows(barCenters, as.matrix(H3K9me3[, c(20:24)]) - as.matrix(H3K9me3[, c(25:29)]), barCenters,
       as.matrix(H3K9me3[, c(20:24)]) + as.matrix(H3K9me3[, c(25:29)]), lwd = 1.5, angle = 90,
       code = 3, length = 0.05)                


###########################################  Scaled  ###########################################


my_data <- read.csv("/Users/alessandroscacchetti/Desktop/Becker_Lab/Dom_project/Kc_RNAi/Acetylation/MS/Analysis/quantification_31-01-19_with_zisis_complete.csv", header = TRUE) 

row.names(my_data) <- my_data$Histone_modifications
head(my_data)
my_data <- my_data[ ,c(3:10, 15:25)]


my_data <- my_data - rowMeans(my_data)


se <- function(x) sd(x)/sqrt(length(x))

my_data$Mean_CTRL <-  rowMeans(my_data[, grep("^CTRL", colnames(my_data))])

my_data$Mean_H2Av <-  rowMeans(my_data[, grep("^H2Av", colnames(my_data))])

#my_data$Mean_AB <-  rowMeans(my_data[, grep("^AB", colnames(my_data))])

my_data$Mean_A <-  rowMeans(my_data[, grep("^A", colnames(my_data))])

my_data$Mean_B <-  rowMeans(my_data[, grep("^B", colnames(my_data))])

my_data$Mean_Tip60 <-  rowMeans(my_data[, grep("^Tip60", colnames(my_data))])


my_data$SE_CTRL <-  apply(as.matrix(my_data[, 1:4]), 1, se)
my_data$SE_H2Av <-  apply(as.matrix(my_data[, 5:8]), 1, se)
#my_data$SE_AB <-  apply(as.matrix(my_data[, 9:12]), 1, se)
my_data$SE_A <-  apply(as.matrix(my_data[, 9:12]), 1, se)
my_data$SE_B <-  apply(as.matrix(my_data[, 13:15]), 1, se)
my_data$SE_Tip60 <-  apply(as.matrix(my_data[, 16:19]), 1, se)

#head(my_data)


summary(my_data)


#my_data_norm <- my_data - rowMeans(my_data)


#write.csv(x = my_data, file = "quantification_31-01-19_with_zisis_complete_mean_SE.csv")


###########for H4 #############


H4 <- my_data[grep("^H4", rownames(my_data)),]
H4_no_unmod <- H4[!grepl("noPTM", rownames(H4)),] 
H4_Ac <- H4_no_unmod[!grepl("me", rownames(H4_no_unmod)),] 
H4_me <- H4_no_unmod[!grepl("ac", rownames(H4_no_unmod)),] 

H3 <- my_data[grep("^H3", rownames(my_data)),]
H3_no_unmod <- H3[!grepl("noPTM", rownames(H3)),] 
H3_Ac <- H3_no_unmod[!grepl("me", rownames(H3_no_unmod)),] 
H3_me <- H3_no_unmod[!grepl("ac", rownames(H3_no_unmod)),] 

# H4_mean <- H4[,20:24]
# H3_mean <- H4[,20:24]

H4_Ac.mat <- data.matrix(H4_Ac[, 1:19])
H4_Ac_mean.mat <- data.matrix(H4_Ac[, 20:24])
H4_me.mat <- data.matrix(H4_me[, 1:19])
H4_me_mean.mat <- data.matrix(H4_me[, 20:24])

H3_Ac.mat <- data.matrix(H3_Ac[, 1:19])
H3_Ac_mean.mat <- data.matrix(H3_Ac[, 20:24])
H3_me.mat <- data.matrix(H3_me[, 1:19])
H3_me_mean.mat <- data.matrix(H3_me[, 20:24])
# 
# opar <- par()


######## clustered heatmaps ########

pheatmap(H4_Ac.mat, main = "H4 tail - Ac", 
         #cluster_cols = FALSE,
         cellwidth = 15, cellheight = 15,
         clustering_distance_rows = "euclidean",
         clustering_distance_cols = "euclidean",
         clustering_method =  "complete",
         color = colorRampPalette(rev(brewer.pal(11, "RdYlBu")))(101), 
         #breaks = seq(-1,1, length.out = 101),
         fontsize = 22, fontsize_col = 14, fontsize_row = 14) 

pheatmap(H4_me.mat, main = "H4 tail - Me", 
         #cluster_cols = FALSE,
         cellwidth = 15, cellheight = 15,
         clustering_distance_rows = "euclidean",
         clustering_distance_cols = "euclidean",
         clustering_method =  "complete",
         color = colorRampPalette(rev(brewer.pal(11, "RdYlBu")))(101), 
         #breaks = seq(-1,1, length.out = 101),
         fontsize = 22, fontsize_col = 14, fontsize_row = 14) 


pheatmap(H3_Ac.mat, main = "H3 tail - Ac", 
         #cluster_cols = FALSE,
         cellwidth = 15, cellheight = 15,
         clustering_distance_rows = "euclidean",
         clustering_distance_cols = "euclidean",
         clustering_method =  "complete",
         color = colorRampPalette(rev(brewer.pal(11, "RdYlBu")))(101), 
         #breaks = seq(-1,1, length.out = 101),
         fontsize = 22, fontsize_col = 14, fontsize_row = 14) 

pheatmap(H3_me.mat, main = "H3 tail - Me", 
         #cluster_cols = FALSE,
         cellwidth = 15, cellheight = 15,
         clustering_distance_rows = "euclidean",
         clustering_distance_cols = "euclidean",
         clustering_method =  "complete",
         color = colorRampPalette(rev(brewer.pal(11, "RdYlBu")))(101), 
         #breaks = seq(-1,1, length.out = 101),
         fontsize = 22, fontsize_col = 14, fontsize_row = 14) 


#means#

pheatmap(H4_Ac_mean.mat, main = "H4 tail - Ac", 
         #cluster_cols = FALSE,
         cellwidth = 15, cellheight = 15,
         clustering_distance_rows = "euclidean",
         clustering_distance_cols = "euclidean",
         clustering_method =  "complete",
         color = colorRampPalette(rev(brewer.pal(11, "RdYlBu")))(101), 
         #breaks = seq(-1,1, length.out = 101),
         fontsize = 22, fontsize_col = 14, fontsize_row = 14) 

pheatmap(H4_me_mean.mat, main = "H4 tail - Me", 
         #cluster_cols = FALSE,
         cellwidth = 15, cellheight = 15,
         clustering_distance_rows = "euclidean",
         clustering_distance_cols = "euclidean",
         clustering_method =  "complete",
         color = colorRampPalette(rev(brewer.pal(11, "RdYlBu")))(101), 
         #breaks = seq(-1,1, length.out = 101),
         fontsize = 22, fontsize_col = 14, fontsize_row = 14) 


pheatmap(H3_Ac_mean.mat, main = "H3 tail - Ac", 
         #cluster_cols = FALSE,
         cellwidth = 15, cellheight = 15,
         clustering_distance_rows = "euclidean",
         clustering_distance_cols = "euclidean",
         clustering_method =  "complete",
         color = colorRampPalette(rev(brewer.pal(11, "RdYlBu")))(101), 
         #breaks = seq(-1,1, length.out = 101),
         fontsize = 22, fontsize_col = 14, fontsize_row = 14) 

pheatmap(H3_me_mean.mat, main = "H3 tail - Me", 
         #cluster_cols = FALSE,
         cellwidth = 15, cellheight = 15,
         clustering_distance_rows = "euclidean",
         clustering_distance_cols = "euclidean",
         clustering_method =  "complete",
         color = colorRampPalette(rev(brewer.pal(11, "RdYlBu")))(101), 
         #breaks = seq(-1,1, length.out = 101),
         fontsize = 22, fontsize_col = 14, fontsize_row = 14) 


######## barplots ########

par(mfrow=c(2,2), pch=20, pty="s", cex.axis = 0.3, cex.lab = 0.2, las = 3)


H4K5Ac <- H4_Ac[grep("H4K5ac", rownames(H4_Ac)),] 
barCenters <- barplot(as.matrix(H4K5Ac[, c(20:24)]), main="H4K5ac", ylim = c(-0.015, 0.02))

segments(barCenters, as.matrix(H4K5Ac[, c(20:24)]) - as.matrix(H4K5Ac[, c(25:29)]), barCenters,
         as.matrix(H4K5Ac[, c(20:24)]) + as.matrix(H4K5Ac[, c(25:29)]), lwd = 1.5)

arrows(barCenters, as.matrix(H4K5Ac[, c(20:24)]) - as.matrix(H4K5Ac[, c(25:29)]), barCenters,
       as.matrix(H4K5Ac[, c(20:24)]) + as.matrix(H4K5Ac[, c(25:29)]), lwd = 1.5, angle = 90,
       code = 3, length = 0.05)


H4K8Ac <- H4_Ac[grep("H4K8ac", rownames(H4_Ac)),] 
barCenters <- barplot(as.matrix(H4K8Ac[, c(20:24)]), main="H4K8ac", ylim = c(-0.015, 0.02))

segments(barCenters, as.matrix(H4K8Ac[, c(20:24)]) - as.matrix(H4K8Ac[, c(25:29)]), barCenters,
         as.matrix(H4K8Ac[, c(20:24)]) + as.matrix(H4K8Ac[, c(25:29)]), lwd = 1.5)

arrows(barCenters, as.matrix(H4K8Ac[, c(20:24)]) - as.matrix(H4K8Ac[, c(25:29)]), barCenters,
       as.matrix(H4K8Ac[, c(20:24)]) + as.matrix(H4K8Ac[, c(25:29)]), lwd = 1.5, angle = 90,
       code = 3, length = 0.05)


H4K12Ac <- H4_Ac[grep("H4K12ac", rownames(H4_Ac)),] 
barCenters <- barplot(as.matrix(H4K12Ac[, c(20:24)]), main="H4K12ac", ylim = c(-0.015, 0.02))

segments(barCenters, as.matrix(H4K12Ac[, c(20:24)]) - as.matrix(H4K12Ac[, c(25:29)]), barCenters,
         as.matrix(H4K12Ac[, c(20:24)]) + as.matrix(H4K12Ac[, c(25:29)]), lwd = 1.5)

arrows(barCenters, as.matrix(H4K12Ac[, c(20:24)]) - as.matrix(H4K12Ac[, c(25:29)]), barCenters,
       as.matrix(H4K12Ac[, c(20:24)]) + as.matrix(H4K12Ac[, c(25:29)]), lwd = 1.5, angle = 90,
       code = 3, length = 0.05)


H4K16Ac <- H4_Ac[grep("H4K16ac", rownames(H4_Ac)),] 
barCenters <- barplot(as.matrix(H4K16Ac[, c(20:24)]), main="H4K16ac", ylim = c(-0.015, 0.02))

segments(barCenters, as.matrix(H4K16Ac[, c(20:24)]) - as.matrix(H4K16Ac[, c(25:29)]), barCenters,
         as.matrix(H4K16Ac[, c(20:24)]) + as.matrix(H4K16Ac[, c(25:29)]), lwd = 1.5)

arrows(barCenters, as.matrix(H4K16Ac[, c(20:24)]) - as.matrix(H4K16Ac[, c(25:29)]), barCenters,
       as.matrix(H4K16Ac[, c(20:24)]) + as.matrix(H4K16Ac[, c(25:29)]), lwd = 1.5, angle = 90,
       code = 3, length = 0.05)


H3K27me1 <- H3_me[grep("H3K27me1", rownames(H3_me)),] 
barCenters <- barplot(as.matrix(H3K27me1[, c(20:24)]), main="H3K27me1", ylim = c(-0.05, 0.05))

segments(barCenters, as.matrix(H3K27me1[, c(20:24)]) - as.matrix(H3K27me1[, c(25:29)]), barCenters,
         as.matrix(H3K27me1[, c(20:24)]) + as.matrix(H3K27me1[, c(25:29)]), lwd = 1.5)

arrows(barCenters, as.matrix(H3K27me1[, c(20:24)]) - as.matrix(H3K27me1[, c(25:29)]), barCenters,
       as.matrix(H3K27me1[, c(20:24)]) + as.matrix(H3K27me1[, c(25:29)]), lwd = 1.5, angle = 90,
       code = 3, length = 0.05)

H3K27me2 <- H3_me[grep("H3K27me2$", rownames(H3_me)),] 
barCenters <- barplot(as.matrix(H3K27me2[, c(20:24)]), main="H3K27me2", ylim = c(-0.05, 0.05))

segments(barCenters, as.matrix(H3K27me2[, c(20:24)]) - as.matrix(H3K27me2[, c(25:29)]), barCenters,
         as.matrix(H3K27me2[, c(20:24)]) + as.matrix(H3K27me2[, c(25:29)]), lwd = 1.5)

arrows(barCenters, as.matrix(H3K27me2[, c(20:24)]) - as.matrix(H3K27me2[, c(25:29)]), barCenters,
       as.matrix(H3K27me2[, c(20:24)]) + as.matrix(H3K27me2[, c(25:29)]), lwd = 1.5, angle = 90,
       code = 3, length = 0.05)


H3K27me3 <- H3_me[grep("H3K27me3$", rownames(H3_me)),] 
barCenters <- barplot(as.matrix(H3K27me3[, c(20:24)]), main="H3K27me3", ylim = c(-0.05, 0.05))

segments(barCenters, as.matrix(H3K27me3[, c(20:24)]) - as.matrix(H3K27me3[, c(25:29)]), barCenters,
         as.matrix(H3K27me3[, c(20:24)]) + as.matrix(H3K27me3[, c(25:29)]), lwd = 1.5)

arrows(barCenters, as.matrix(H3K27me3[, c(20:24)]) - as.matrix(H3K27me3[, c(25:29)]), barCenters,
       as.matrix(H3K27me3[, c(20:24)]) + as.matrix(H3K27me3[, c(25:29)]), lwd = 1.5, angle = 90,
       code = 3, length = 0.05)                

H3K9me3 <- H3_me[grep("H3K9me3$", rownames(H3_me)),] 
barCenters <- barplot(as.matrix(H3K9me3[, c(20:24)]), main="H3K9me3", ylim = c(-0.05, 0.05))

segments(barCenters, as.matrix(H3K9me3[, c(20:24)]) - as.matrix(H3K9me3[, c(25:29)]), barCenters,
         as.matrix(H3K9me3[, c(20:24)]) + as.matrix(H3K9me3[, c(25:29)]), lwd = 1.5)

arrows(barCenters, as.matrix(H3K9me3[, c(20:24)]) - as.matrix(H3K9me3[, c(25:29)]), barCenters,
       as.matrix(H3K9me3[, c(20:24)]) + as.matrix(H3K9me3[, c(25:29)]), lwd = 1.5, angle = 90,
       code = 3, length = 0.05)                


###########################################  Fold-change  ###########################################


my_data <- read.csv("/Users/alessandroscacchetti/Desktop/Becker_Lab/Dom_project/Kc_RNAi/Acetylation/MS/Analysis/quantification_31-01-19_with_zisis_complete.csv", header = TRUE) 

row.names(my_data) <- my_data$Histone_modifications
head(my_data)
my_data <- my_data[ ,c(3:10, 15:25)]

#my_data <- my_data - rowMeans(my_data)


se <- function(x) sd(x)/sqrt(length(x))

my_data$Mean_CTRL <-  rowMeans(my_data[, grep("^CTRL", colnames(my_data))])

my_data$Mean_H2Av <-  rowMeans(my_data[, grep("^H2Av", colnames(my_data))])

#my_data$Mean_AB <-  rowMeans(my_data[, grep("^AB", colnames(my_data))])

my_data$Mean_A <-  rowMeans(my_data[, grep("^A", colnames(my_data))])

my_data$Mean_B <-  rowMeans(my_data[, grep("^B", colnames(my_data))])

my_data$Mean_Tip60 <-  rowMeans(my_data[, grep("^Tip60", colnames(my_data))])


my_data$SE_CTRL <-  apply(as.matrix(my_data[, 1:4]), 1, se)
my_data$SE_H2Av <-  apply(as.matrix(my_data[, 5:8]), 1, se)
#my_data$SE_AB <-  apply(as.matrix(my_data[, 9:12]), 1, se)
my_data$SE_A <-  apply(as.matrix(my_data[, 9:12]), 1, se)
my_data$SE_B <-  apply(as.matrix(my_data[, 13:15]), 1, se)
my_data$SE_Tip60 <-  apply(as.matrix(my_data[, 16:19]), 1, se)


my_data$FC_CTRL <- log2(my_data$Mean_CTRL) - log2(my_data$Mean_CTRL)

my_data$FC_H2Av <- log2(my_data$Mean_H2Av) - log2(my_data$Mean_CTRL)

#my_data$FC_AB <- log2(my_data$Mean_AB) - log2(my_data$Mean_CTRL)

my_data$FC_A <- log2(my_data$Mean_A) - log2(my_data$Mean_CTRL)

my_data$FC_B <- log2(my_data$Mean_B) - log2(my_data$Mean_CTRL)

my_data$FC_Tip60 <- log2(my_data$Mean_Tip60) - log2(my_data$Mean_CTRL)


my_data$SE_FC_CTRL <- sqrt((my_data$SE_CTRL)*(my_data$SE_CTRL) + (my_data$SE_CTRL)*(my_data$SE_CTRL))
my_data$SE_FC_H2Av <- sqrt((my_data$SE_H2Av)*(my_data$SE_H2Av) + (my_data$SE_CTRL)*(my_data$SE_CTRL))
#my_data$SE_FC_AB <- sqrt((my_data$SE_AB)*(my_data$SE_AB) + (my_data$SE_CTRL)*(my_data$SE_CTRL))
my_data$SE_FC_A <- sqrt((my_data$SE_A)*(my_data$SE_A) + (my_data$SE_CTRL)*(my_data$SE_CTRL))
my_data$SE_FC_B <- sqrt((my_data$SE_B)*(my_data$SE_B) + (my_data$SE_CTRL)*(my_data$SE_CTRL))
my_data$SE_FC_Tip60 <- sqrt((my_data$SE_Tip60)*(my_data$SE_Tip60) + (my_data$SE_CTRL)*(my_data$SE_CTRL))


head(my_data)


summary(my_data)


#my_data_norm <- my_data - rowMeans(my_data)


#write.csv(x = my_data, file = "quantification_31-01-19_with_zisis_complete_mean_SE.csv")


###########for H4 #############


H4 <- my_data[grep("^H4", rownames(my_data)),]
H4_no_unmod <- H4[!grepl("noPTM", rownames(H4)),] 
H4_Ac <- H4_no_unmod[!grepl("me", rownames(H4_no_unmod)),] 
H4_me <- H4_no_unmod[!grepl("ac", rownames(H4_no_unmod)),] 

H3 <- my_data[grep("^H3", rownames(my_data)),]
H3_no_unmod <- H3[!grepl("noPTM", rownames(H3)),] 
H3_Ac <- H3_no_unmod[!grepl("me", rownames(H3_no_unmod)),] 
H3_me <- H3_no_unmod[!grepl("ac", rownames(H3_no_unmod)),] 


H4_Ac_mean.mat <- data.matrix(H4_Ac[, 30:34])

H4_me_mean.mat <- data.matrix(H4_me[, 30:34])


H3_Ac_mean.mat <- data.matrix(H3_Ac[, 30:34])

H3_me_mean.mat <- data.matrix(H3_me[, 30:34])


# opar <- par()


######## clustered heatmaps ########


pheatmap(H4_Ac_mean.mat, main = "H4 tail - FC - Ac", 
         #cluster_cols = FALSE,
         cellwidth = 15, cellheight = 15,
         clustering_distance_rows = "euclidean",
         clustering_distance_cols = "euclidean",
         clustering_method =  "complete",
         color = colorRampPalette(rev(brewer.pal(11, "RdYlBu")))(101), 
         breaks = seq(-1,1, length.out = 101),
         fontsize = 22, fontsize_col = 14, fontsize_row = 14) 

pheatmap(H4_me_mean.mat, main = "H4 tail - FC - Me", 
         #cluster_cols = FALSE,
         cellwidth = 15, cellheight = 15,
         clustering_distance_rows = "euclidean",
         clustering_distance_cols = "euclidean",
         clustering_method =  "complete",
         color = colorRampPalette(rev(brewer.pal(11, "RdYlBu")))(101), 
         breaks = seq(-1,1, length.out = 101),
         fontsize = 22, fontsize_col = 14, fontsize_row = 14) 


pheatmap(H3_Ac_mean.mat, main = "H3 tail - FC - Ac", 
         #cluster_cols = FALSE,
         cellwidth = 15, cellheight = 15,
         clustering_distance_rows = "euclidean",
         clustering_distance_cols = "euclidean",
         clustering_method =  "complete",
         color = colorRampPalette(rev(brewer.pal(11, "RdYlBu")))(101), 
         breaks = seq(-1,1, length.out = 101),
         fontsize = 22, fontsize_col = 14, fontsize_row = 14) 

pheatmap(H3_me_mean.mat, main = "H3 tail - FC - Me", 
         #cluster_cols = FALSE,
         cellwidth = 15, cellheight = 15,
         clustering_distance_rows = "euclidean",
         clustering_distance_cols = "euclidean",
         clustering_method =  "complete",
         color = colorRampPalette(rev(brewer.pal(11, "RdYlBu")))(101), 
         breaks = seq(-1,1, length.out = 101),
         fontsize = 22, fontsize_col = 14, fontsize_row = 14) 


######## barplots ########

par(mfrow=c(2,2), pch=20, pty="s", cex.axis = 0.3, cex.lab = 0.2, las = 3)


H4K5Ac <- H4_Ac[grep("H4K5ac", rownames(H4_Ac)),] 
barCenters <- barplot(as.matrix(H4K5Ac[, c(30:34)]), main="H4K5ac", ylim = c(-1, 1))

segments(barCenters, as.matrix(H4K5Ac[, c(30:34)]) - as.matrix(H4K5Ac[, c(35:39)]), barCenters,
         as.matrix(H4K5Ac[, c(30:34)]) + as.matrix(H4K5Ac[, c(35:39)]), lwd = 1.5)

arrows(barCenters, as.matrix(H4K5Ac[, c(30:34)]) - as.matrix(H4K5Ac[, c(35:39)]), barCenters,
       as.matrix(H4K5Ac[, c(30:34)]) + as.matrix(H4K5Ac[, c(35:39)]), lwd = 1.5, angle = 90,
       code = 3, length = 0.05)


H4K8Ac <- H4_Ac[grep("H4K8ac", rownames(H4_Ac)),] 
barCenters <- barplot(as.matrix(H4K8Ac[, c(30:34)]), main="H4K8ac", ylim = c(-1, 1))

segments(barCenters, as.matrix(H4K8Ac[, c(30:34)]) - as.matrix(H4K8Ac[, c(35:39)]), barCenters,
         as.matrix(H4K8Ac[, c(30:34)]) + as.matrix(H4K8Ac[, c(35:39)]), lwd = 1.5)

arrows(barCenters, as.matrix(H4K8Ac[, c(30:34)]) - as.matrix(H4K8Ac[, c(35:39)]), barCenters,
       as.matrix(H4K8Ac[, c(30:34)]) + as.matrix(H4K8Ac[, c(35:39)]), lwd = 1.5, angle = 90,
       code = 3, length = 0.05)


H4K12Ac <- H4_Ac[grep("H4K12ac", rownames(H4_Ac)),] 
barCenters <- barplot(as.matrix(H4K12Ac[, c(30:34)]), main="H4K12ac", ylim = c(-1, 1))

segments(barCenters, as.matrix(H4K12Ac[, c(30:34)]) - as.matrix(H4K12Ac[, c(35:39)]), barCenters,
         as.matrix(H4K12Ac[, c(30:34)]) + as.matrix(H4K12Ac[, c(35:39)]), lwd = 1.5)

arrows(barCenters, as.matrix(H4K12Ac[, c(30:34)]) - as.matrix(H4K12Ac[, c(35:39)]), barCenters,
       as.matrix(H4K12Ac[, c(30:34)]) + as.matrix(H4K12Ac[, c(35:39)]), lwd = 1.5, angle = 90,
       code = 3, length = 0.05)


H4K16Ac <- H4_Ac[grep("H4K16ac", rownames(H4_Ac)),] 
barCenters <- barplot(as.matrix(H4K16Ac[, c(30:34)]), main="H4K16ac", ylim = c(-1, 1))

segments(barCenters, as.matrix(H4K16Ac[, c(30:34)]) - as.matrix(H4K16Ac[, c(35:39)]), barCenters,
         as.matrix(H4K16Ac[, c(30:34)]) + as.matrix(H4K16Ac[, c(35:39)]), lwd = 1.5)

arrows(barCenters, as.matrix(H4K16Ac[, c(30:34)]) - as.matrix(H4K16Ac[, c(35:39)]), barCenters,
       as.matrix(H4K16Ac[, c(30:34)]) + as.matrix(H4K16Ac[, c(35:39)]), lwd = 1.5, angle = 90,
       code = 3, length = 0.05)


H3K27me1 <- H3_me[grep("H3K27me1", rownames(H3_me)),] 
barCenters <- barplot(as.matrix(H3K27me1[, c(30:34)]), main="H3K27me1", ylim = c(-1, 1))

segments(barCenters, as.matrix(H3K27me1[, c(30:34)]) - as.matrix(H3K27me1[, c(35:39)]), barCenters,
         as.matrix(H3K27me1[, c(30:34)]) + as.matrix(H3K27me1[, c(35:39)]), lwd = 1.5)

arrows(barCenters, as.matrix(H3K27me1[, c(30:34)]) - as.matrix(H3K27me1[, c(35:39)]), barCenters,
       as.matrix(H3K27me1[, c(30:34)]) + as.matrix(H3K27me1[, c(35:39)]), lwd = 1.5, angle = 90,
       code = 3, length = 0.05)

H3K27me2 <- H3_me[grep("H3K27me2$", rownames(H3_me)),] 
barCenters <- barplot(as.matrix(H3K27me2[, c(30:34)]), main="H3K27me2", ylim = c(-1, 1))

segments(barCenters, as.matrix(H3K27me2[, c(30:34)]) - as.matrix(H3K27me2[, c(35:39)]), barCenters,
         as.matrix(H3K27me2[, c(30:34)]) + as.matrix(H3K27me2[, c(35:39)]), lwd = 1.5)

arrows(barCenters, as.matrix(H3K27me2[, c(30:34)]) - as.matrix(H3K27me2[, c(35:39)]), barCenters,
       as.matrix(H3K27me2[, c(30:34)]) + as.matrix(H3K27me2[, c(35:39)]), lwd = 1.5, angle = 90,
       code = 3, length = 0.05)


H3K27me3 <- H3_me[grep("H3K27me3$", rownames(H3_me)),] 
barCenters <- barplot(as.matrix(H3K27me3[, c(30:34)]), main="H3K27me3", ylim = c(-1, 1))

segments(barCenters, as.matrix(H3K27me3[, c(30:34)]) - as.matrix(H3K27me3[, c(35:39)]), barCenters,
         as.matrix(H3K27me3[, c(30:34)]) + as.matrix(H3K27me3[, c(35:39)]), lwd = 1.5)

arrows(barCenters, as.matrix(H3K27me3[, c(30:34)]) - as.matrix(H3K27me3[, c(35:39)]), barCenters,
       as.matrix(H3K27me3[, c(30:34)]) + as.matrix(H3K27me3[, c(35:39)]), lwd = 1.5, angle = 90,
       code = 3, length = 0.05)                

H3K9me3 <- H3_me[grep("H3K9me3$", rownames(H3_me)),] 
barCenters <- barplot(as.matrix(H3K9me3[, c(30:34)]), main="H3K9me3", ylim = c(-1, 1))

segments(barCenters, as.matrix(H3K9me3[, c(30:34)]) - as.matrix(H3K9me3[, c(35:39)]), barCenters,
         as.matrix(H3K9me3[, c(30:34)]) + as.matrix(H3K9me3[, c(35:39)]), lwd = 1.5)

arrows(barCenters, as.matrix(H3K9me3[, c(30:34)]) - as.matrix(H3K9me3[, c(35:39)]), barCenters,
       as.matrix(H3K9me3[, c(30:34)]) + as.matrix(H3K9me3[, c(35:39)]), lwd = 1.5, angle = 90,
       code = 3, length = 0.05)             


#################no H2Av and AB##################


# my_data <- my_data - rowMeans(my_data)
# 
# 
# H4 <- my_data[grep("^H4", rownames(my_data)),]
# H4_no_unmod <- H4[!grepl("noPTM", rownames(H4)),] 
# H4_Ac <- H4_no_unmod[!grepl("me", rownames(H4_no_unmod)),] 
# H4_me <- H4_no_unmod[!grepl("ac", rownames(H4_no_unmod)),] 
# 
# H3 <- my_data[grep("^H3", rownames(my_data)),]
# H3_no_unmod <- H3[!grepl("noPTM", rownames(H3)),] 
# H3_Ac <- H3_no_unmod[!grepl("me", rownames(H3_no_unmod)),] 
# H3_me <- H3_no_unmod[!grepl("ac", rownames(H3_no_unmod)),] 
# 
# H4_mean_short <- H4[,c(24,27:29)]
# H3_mean_short <- H4[,20:24]
# 
# H4_Ac_short.mat <- data.matrix(H4_Ac[, c(1:4, 13:23)])
# H4_Ac_mean_short.mat <- data.matrix(H4_Ac[, 20:24])
# H4_me_short.mat <- data.matrix(H4_me[, 1:19])
# H4_me_mean_short.mat <- data.matrix(H4_me[, 20:24])
# 
# H3_Ac.mat <- data.matrix(H3_Ac[, 1:19])
# H3_Ac_mean.mat <- data.matrix(H3_Ac[, 20:24])
# H3_me.mat <- data.matrix(H3_me[, 1:19])
# H3_me_mean.mat <- data.matrix(H3_me[, 20:24])
# 
# 
# 
# 
# pheatmap(H4_Ac_short.mat, main = "H4 tail", 
#          #cluster_cols = FALSE,
#          clustering_distance_rows = "euclidean",
#          clustering_distance_cols = "euclidean",
#          clustering_method =  "complete",
#          color = colorRampPalette(brewer.pal(11, "RdYlBu"))(101), 
#          #breaks = seq(-1,1, length.out = 101),
#          fontsize = 22, fontsize_col = 14, fontsize_row = 14) 
# #border_color = NA, 
# #number_color = "grey50",
# #display_numbers = TRUE)
# 
# 
# 
# H4K5Ac <- H4_Ac[grep("H4K5ac", rownames(H4_Ac)),] 
# barplot(as.matrix(H4K5Ac[, c(24,27:29)]), main="H4K5ac")
# H4K8Ac <- H4_Ac[grep("H4K8ac", rownames(H4_Ac)),] 
# barplot(as.matrix(H4K8Ac[, c(24,27:29)]), main="H4K8ac")
# H4K12Ac <- H4_Ac[grep("H4K12ac", rownames(H4_Ac)),] 
# barplot(as.matrix(H4K12Ac[, c(24,27:29)]), main="H4K12ac")
# H4K16Ac <- H4_Ac[grep("H4K16ac", rownames(H4_Ac)),] 
# barplot(as.matrix(H4K16Ac[, c(24,27:29)]), main="H4K16ac")
# 
# H4K5K8K12Ac <- H4_Ac[grep("H4K5K8K12ac", rownames(H4_Ac)),] 
# barplot(as.matrix(H4K5K8K12Ac[, 20:24]), main="H4K5K8K12Ac")
# 
# 


dev.off()
