# Supplementary material for: Drosophila SWR1 and NuA4 complexes are defined by DOMINO isoforms
Source: eLife. 2020 May 20;9:e56325. doi: 10.7554/eLife.56325 (PMC7239659; doi:10.7554/eLife.56325)
Supplement: Supplementary file 5. [file elife-56325-supp5.xlsx]

## Sheet: rawOutput_Skyline
PeptideNote	Peptide	Precursor	Protein	Replicate	PeptidePeakFoundRatio	PeptideRetentionTime	TransitionResult	FragmentIon	TotalAreaMs1
MS1_T3R8_NoPTM	TKQTAR	375.2208++	H3_3-8	blank_00	1	42.2827	1493388	precursor	2.25459e+06
MS1_T3R8_NoPTM	TKQTAR	375.2208++	H3_3-8	blank_01	1	41.509	1385806	precursor	1.96853e+06
MS1_T3R8_NoPTM	TKQTAR	375.2208++	H3_3-8	Ref2007_AS_01_181219	1	19.5197	2926419000	precursor	4294381824
MS1_T3R8_NoPTM	TKQTAR	375.2208++	H3_3-8	Ref2007_AS_02_181219	1	19.4593	3062726000	precursor	4484804608
MS1_T3R8_NoPTM	TKQTAR	375.2208++	H3_3-8	Ref2007_AS_03_181219	1	19.4191	3033916000	precursor	4470539776
MS1_T3R8_NoPTM	TKQTAR	375.2208++	H3_3-8	Ref2007_AS_04_181219	1	19.4795	2465975000	precursor	3634904576
MS1_T3R8_NoPTM	TKQTAR	375.2208++	H3_3-8	Ref2007_AS_05_181219	1	19.4593	3009994000	precursor	4416950272
MS1_T3R8_NoPTM	TKQTAR	375.2208++	H3_3-8	Ref2007_AS_06_181219	1	19.4392	3249564000	precursor	4787618304
MS1_T3R8_NoPTM	TKQTAR	375.2208++	H3_3-8	Ref2007_AS_07_181219	1	19.4392	2785137000	precursor	4077272576
MS1_T3R8_NoPTM	TKQTAR	375.2208++	H3_3-8	Ref2007_AS_08_181219	1	19.4795	4617572000	precursor	6815706624
MS1_T3R8_NoPTM	TKQTAR	375.2208++	H3_3-8	Ref2007_AS_09_181219	1	19.4393	2168115000	precursor	3166653184
MS1_T3R8_NoPTM	TKQTAR	375.2208++	H3_3-8	Ref2007_AS_10_181219	1	19.4593	4330636000	precursor	6371342336
MS1_T3R8_NoPTM	TKQTAR	375.2208++	H3_3-8	Ref2007_AS_11_181219	1	19.4191	2359145000	precursor	3458999296
MS1_T3R8_NoPTM	TKQTAR	375.2208++	H3_3-8	Ref2007_AS_12_181219	1	19.5197	4012160000	precursor	5842539008
MS1_T3R8_NoPTM	TKQTAR	375.2208++	H3_3-8	Ref2007_AS_13_181219	1	19.4393	3793218000	precursor	5538895360
MS1_T3R8_NoPTM	TKQTAR	375.2208++	H3_3-8	Ref2007_AS_14_181219	1	19.4593	4713697000	precursor	6876514304
MS1_T3R8_NoPTM	TKQTAR	375.2208++	H3_3-8	Ref2007_AS_15_181219	1	19.4392	4264748000	precursor	6221716480
MS1_T3R8_NoPTM	TKQTAR	375.2208++	H3_3-8	Ref2007_AS_16_181219	1	19.4795	3716427000	precursor	5416097792
MS1_T3R8_NoPTM	TKQTAR	375.2208++	H3_3-8	Ref2007_AS_17_181219	1	19.4795	3064053000	precursor	4472222720
MS1_T3R8_NoPTM	TKQTAR	375.2208++	H3_3-8	Ref2007_AS_18_181219	1	19.4594	2717247000	precursor	3962856192
MS1_T3R8_NoPTM	TKQTAR	375.2208++	H3_3-8	Ref2007_AS_19_181219	1	19.4191	1610962000	precursor	2373399040
MS1_T3R8_NoPTM	TKQTAR	375.2208++	H3_3-8	Ref2007_AS_20_181219	1	19.4795	4143627000	precursor	6058308096
MS1_T3R8_NoPTM	TKQTAR	375.2208++	H3_3-8	Ref2007_AS_21_181219	1	19.4393	1853761000	precursor	2718395392
MS1_T3R8_NoPTM	TKQTAR	375.2208++	H3_3-8	Ref2007_AS_22_181219	1	19.4594	2287134000	precursor	3375589888
MS1_T3R8_NoPTM	TKQTAR	375.2208++	H3_3-8	Ref2007_AS_23_181219	1	19.7078	4141882000	precursor	6075487744
MS1_T3R8_NoPTM	TKQTAR	375.2208++	H3_3-8	Ref2007_AS_24_181219	1	19.4593	5320052000	precursor	7787959808
MS1_T3R8_NoPTM	TKQTAR	375.2208++	H3_3-8	Ref2007_AS_25_181219	1	19.4794	4561861000	precursor	6657469952
MS1_T3R8_NoPTM	TKQTAR	375.2208++	H3_3-8	Ref2007_AS_26_181219	1	19.4593	3743010000	precursor	5485966848
MS1_T3R8_NoPTM	TKQTAR	375.2208++	H3_3-8	Ref2007_AS_27_181219	1	19.4795	6239565000	precursor	9171730432
MS1_T3R8_NoPTM	TKQTAR	375.2208++	H3_3-8	Ref2007_AS_28_181219	1	19.4192	3079332000	precursor	4510800384
MS1_T3R8_NoPTM	TKQTAR	375.2208++	H3_3-8	Ref2007_AS_29_181219	1	19.3991	5627705000	precursor	8239451648
MS1_T3R8_NoPTM	TKQTAR	375.2208++	H3_3-8	Ref2007_AS_30_181219	1	19.4392	5953962000	precursor	8778472448
MS1_T3R8_NoPTM	TKQTAR	375.2208++	H3_3-8	Ref2007_AS_31_181219	1	19.4995	3898580000	precursor	5771407360
MS1_T3R8_NoPTM	TKQTAR	375.2208++	H3_3-8	Ref2007_AS_32_181219	1	19.4593	2511129000	precursor	3676795392
MS1_T3R8_NoPTM	TKQTAR	375.2208++	H3_3-8	Ref2007_AS_33_181219	1	19.4794	3774834000	precursor	5549799936
MS1_T3R8_NoPTM	TKQTAR	375.2208++	H3_3-8	Ref2007_AS_34_181219	1	19.4191	2841006000	precursor	4170557440
MS1_T3R8_NoPTM	TKQTAR	375.2208++	H3_3-8	Ref2007_AS_35_181219	1	19.4794	4055647000	precursor	5955437568
MS1_T3R8_NoPTM	TKQTAR	375.2208++	H3_3-8	Ref2007_AS_QC0_181219	1	19.2985	2935171000	precursor	4336758784
MS1_T3R8_NoPTM	TKQTAR	375.2208++	H3_3-8	Ref2007_AS_QC1_181219	1	19.2784	2192790000	precursor	3232371200
MS1_T3R8_NoPTM	TKQTAR	375.2208++	H3_3-8	Ref2007_AS_QC2_181219	1	19.1779	3709923000	precursor	5481356288
MS1_T3R8_NoPTM	TKQTAR	375.2208++	H3_3-8	Ref2007_AS_QC3_181219	1	19.198	3064354000	precursor	4528756736
MS1_T3R8_NoPTM	TKQTAR	375.2208++	H3_3-8	Ref2007_AS_QC4_181219	1	19.1779	2697069000	precursor	3981477376
MS1_T3R8_NoPTM	TKQTAR	375.2208++	H3_3-8	Ref2007_AS_QC5_181219	1	19.178	1992999000	precursor	2930885888
MS1_T3R8_NoPTM	TKQTAR	375.2208++	H3_3-8	blank_00	1	42.2827	640314	precursor [M+1]	2.25459e+06
MS1_T3R8_NoPTM	TKQTAR	375.2208++	H3_3-8	blank_01	1	41.509	511047	precursor [M+1]	1.96853e+06
MS1_T3R8_NoPTM	TKQTAR	375.2208++	H3_3-8	Ref2007_AS_01_181219	1	19.5197	1098061000	precursor [M+1]	4294381824
MS1_T3R8_NoPTM	TKQTAR	375.2208++	H3_3-8	Ref2007_AS_02_181219	1	19.4593	1153097000	precursor [M+1]	4484804608
MS1_T3R8_NoPTM	TKQTAR	375.2208++	H3_3-8	Ref2007_AS_03_181219	1	19.4191	1153059000	precursor [M+1]	4470539776
MS1_T3R8_NoPTM	TKQTAR	375.2208++	H3_3-8	Ref2007_AS_04_181219	1	19.4795	934545400	precursor [M+1]	3634904576
MS1_T3R8_NoPTM	TKQTAR	375.2208++	H3_3-8	Ref2007_AS_05_181219	1	19.4593	1135681000	precursor [M+1]	4416950272
MS1_T3R8_NoPTM	TKQTAR	375.2208++	H3_3-8	Ref2007_AS_06_181219	1	19.4392	1238846000	precursor [M+1]	4787618304
MS1_T3R8_NoPTM	TKQTAR	375.2208++	H3_3-8	Ref2007_AS_07_181219	1	19.4392	1035414000	precursor [M+1]	4077272576
MS1_T3R8_NoPTM	TKQTAR	375.2208++	H3_3-8	Ref2007_AS_08_181219	1	19.4795	1771612000	precursor [M+1]	6815706624
MS1_T3R8_NoPTM	TKQTAR	375.2208++	H3_3-8	Ref2007_AS_09_181219	1	19.4393	801412700	precursor [M+1]	3166653184
MS1_T3R8_NoPTM	TKQTAR	375.2208++	H3_3-8	Ref2007_AS_10_181219	1	19.4593	1638182000	precursor [M+1]	6371342336
MS1_T3R8_NoPTM	TKQTAR	375.2208++	H3_3-8	Ref2007_AS_11_181219	1	19.4191	887539100	precursor [M+1]	3458999296
MS1_T3R8_NoPTM	TKQTAR	375.2208++	H3_3-8	Ref2007_AS_12_181219	1	19.5197	1472471000	precursor [M+1]	5842539008
MS1_T3R8_NoPTM	TKQTAR	375.2208++	H3_3-8	Ref2007_AS_13_181219	1	19.4393	1395488000	precursor [M+1]	5538895360
MS1_T3R8_NoPTM	TKQTAR	375.2208++	H3_3-8	Ref2007_AS_14_181219	1	19.4593	1730655000	precursor [M+1]	6876514304
MS1_T3R8_NoPTM	TKQTAR	375.2208++	H3_3-8	Ref2007_AS_15_181219	1	19.4392	1576320000	precursor [M+1]	6221716480
MS1_T3R8_NoPTM	TKQTAR	375.2208++	H3_3-8	Ref2007_AS_16_181219	1	19.4795	1366085000	precursor [M+1]	5416097792
MS1_T3R8_NoPTM	TKQTAR	375.2208++	H3_3-8	Ref2007_AS_17_181219	1	19.4795	1129129000	precursor [M+1]	4472222720
MS1_T3R8_NoPTM	TKQTAR	375.2208++	H3_3-8	Ref2007_AS_18_181219	1	19.4594	1007570000	precursor [M+1]	3962856192
MS1_T3R8_NoPTM	TKQTAR	375.2208++	H3_3-8	Ref2007_AS_19_181219	1	19.4191	611047700	precursor [M+1]	2373399040
MS1_T3R8_NoPTM	TKQTAR	375.2208++	H3_3-8	Ref2007_AS_20_181219	1	19.4795	1545374000	precursor [M+1]	6058308096
MS1_T3R8_NoPTM	TKQTAR	375.2208++	H3_3-8	Ref2007_AS_21_181219	1	19.4393	692718800	precursor [M+1]	2718395392
MS1_T3R8_NoPTM	TKQTAR	375.2208++	H3_3-8	Ref2007_AS_22_181219	1	19.4594	876361600	precursor [M+1]	3375589888
MS1_T3R8_NoPTM	TKQTAR	375.2208++	H3_3-8	Ref2007_AS_23_181219	1	19.7078	1537783000	precursor [M+1]	6075487744
MS1_T3R8_NoPTM	TKQTAR	375.2208++	H3_3-8	Ref2007_AS_24_181219	1	19.4593	1978367000	precursor [M+1]	7787959808
MS1_T3R8_NoPTM	TKQTAR	375.2208++	H3_3-8	Ref2007_AS_25_181219	1	19.4794	1688220000	precursor [M+1]	6657469952
MS1_T3R8_NoPTM	TKQTAR	375.2208++	H3_3-8	Ref2007_AS_26_181219	1	19.4593	1411124000	precursor [M+1]	5485966848
MS1_T3R8_NoPTM	TKQTAR	375.2208++	H3_3-8	Ref2007_AS_27_181219	1	19.4795	2360466000	precursor [M+1]	9171730432
MS1_T3R8_NoPTM	TKQTAR	375.2208++	H3_3-8	Ref2007_AS_28_181219	1	19.4192	1150720000	precursor [M+1]	4510800384
MS1_T3R8_NoPTM	TKQTAR	375.2208++	H3_3-8	Ref2007_AS_29_181219	1	19.3991	2095414000	precursor [M+1]	8239451648
MS1_T3R8_NoPTM	TKQTAR	375.2208++	H3_3-8	Ref2007_AS_30_181219	1	19.4392	2276624000	precursor [M+1]	8778472448
MS1_T3R8_NoPTM	TKQTAR	375.2208++	H3_3-8	Ref2007_AS_31_181219	1	19.4995	1505182000	precursor [M+1]	5771407360
MS1_T3R8_NoPTM	TKQTAR	375.2208++	H3_3-8	Ref2007_AS_32_181219	1	19.4593	935522600	precursor [M+1]	3676795392
MS1_T3R8_NoPTM	TKQTAR	375.2208++	H3_3-8	Ref2007_AS_33_181219	1	19.4794	1430732000	precursor [M+1]	5549799936
MS1_T3R8_NoPTM	TKQTAR	375.2208++	H3_3-8	Ref2007_AS_34_181219	1	19.4191	1068147000	precursor [M+1]	4170557440
MS1_T3R8_NoPTM	TKQTAR	375.2208++	H3_3-8	Ref2007_AS_35_181219	1	19.4794	1531164000	precursor [M+1]	5955437568
MS1_T3R8_NoPTM	TKQTAR	375.2208++	H3_3-8	Ref2007_AS_QC0_181219	1	19.2985	1125370000	precursor [M+1]	4336758784
MS1_T3R8_NoPTM	TKQTAR	375.2208++	H3_3-8	Ref2007_AS_QC1_181219	1	19.2784	832943400	precursor [M+1]	3232371200
MS1_T3R8_NoPTM	TKQTAR	375.2208++	H3_3-8	Ref2007_AS_QC2_181219	1	19.1779	1426658000	precursor [M+1]	5481356288
MS1_T3R8_NoPTM	TKQTAR	375.2208++	H3_3-8	Ref2007_AS_QC3_181219	1	19.198	1173530000	precursor [M+1]	4528756736
MS1_T3R8_NoPTM	TKQTAR	375.2208++	H3_3-8	Ref2007_AS_QC4_181219	1	19.1779	1032229000	precursor [M+1]	3981477376
MS1_T3R8_NoPTM	TKQTAR	375.2208++	H3_3-8	Ref2007_AS_QC5_181219	1	19.178	751941200	precursor [M+1]	2930885888
MS1_T3R8_NoPTM	TKQTAR	375.2208++	H3_3-8	blank_00	1	42.2827	120890	precursor [M+2]	2.25459e+06
MS1_T3R8_NoPTM	TKQTAR	375.2208++	H3_3-8	blank_01	1	41.509	71675	precursor [M+2]	1.96853e+06
MS1_T3R8_NoPTM	TKQTAR	375.2208++	H3_3-8	Ref2007_AS_01_181219	1	19.5197	269901600	precursor [M+2]	4294381824
MS1_T3R8_NoPTM	TKQTAR	375.2208++	H3_3-8	Ref2007_AS_02_181219	1	19.4593	268981100	precursor [M+2]	4484804608
MS1_T3R8_NoPTM	TKQTAR	375.2208++	H3_3-8	Ref2007_AS_03_181219	1	19.4191	283564400	precursor [M+2]	4470539776
MS1_T3R8_NoPTM	TKQTAR	375.2208++	H3_3-8	Ref2007_AS_04_181219	1	19.4795	234383900	precursor [M+2]	3634904576
MS1_T3R8_NoPTM	TKQTAR	375.2208++	H3_3-8	Ref2007_AS_05_181219	1	19.4593	271276200	precursor [M+2]	4416950272
MS1_T3R8_NoPTM	TKQTAR	375.2208++	H3_3-8	Ref2007_AS_06_181219	1	19.4392	299208300	precursor [M+2]	4787618304
MS1_T3R8_NoPTM	TKQTAR	375.2208++	H3_3-8	Ref2007_AS_07_181219	1	19.4392	256721400	precursor [M+2]	4077272576
MS1_T3R8_NoPTM	TKQTAR	375.2208++	H3_3-8	Ref2007_AS_08_181219	1	19.4795	426523100	precursor [M+2]	6815706624
MS1_T3R8_NoPTM	TKQTAR	375.2208++	H3_3-8	Ref2007_AS_09_181219	1	19.4393	197125000	precursor [M+2]	3166653184
MS1_T3R8_NoPTM	TKQTAR	375.2208++	H3_3-8	Ref2007_AS_10_181219	1	19.4593	402525300	precursor [M+2]	6371342336
MS1_T3R8_NoPTM	TKQTAR	375.2208++	H3_3-8	Ref2007_AS_11_181219	1	19.4191	212315100	precursor [M+2]	3458999296
MS1_T3R8_NoPTM	TKQTAR	375.2208++	H3_3-8	Ref2007_AS_12_181219	1	19.5197	357908600	precursor [M+2]	5842539008
MS1_T3R8_NoPTM	TKQTAR	375.2208++	H3_3-8	Ref2007_AS_13_181219	1	19.4393	350189900	precursor [M+2]	5538895360
MS1_T3R8_NoPTM	TKQTAR	375.2208++	H3_3-8	Ref2007_AS_14_181219	1	19.4593	432161800	precursor [M+2]	6876514304
MS1_T3R8_NoPTM	TKQTAR	375.2208++	H3_3-8	Ref2007_AS_15_181219	1	19.4392	380648500	precursor [M+2]	6221716480
MS1_T3R8_NoPTM	TKQTAR	375.2208++	H3_3-8	Ref2007_AS_16_181219	1	19.4795	333585500	precursor [M+2]	5416097792
MS1_T3R8_NoPTM	TKQTAR	375.2208++	H3_3-8	Ref2007_AS_17_181219	1	19.4795	279040800	precursor [M+2]	4472222720
MS1_T3R8_NoPTM	TKQTAR	375.2208++	H3_3-8	Ref2007_AS_18_181219	1	19.4594	238038500	precursor [M+2]	3962856192
MS1_T3R8_NoPTM	TKQTAR	375.2208++	H3_3-8	Ref2007_AS_19_181219	1	19.4191	151389400	precursor [M+2]	2373399040
MS1_T3R8_NoPTM	TKQTAR	375.2208++	H3_3-8	Ref2007_AS_20_181219	1	19.4795	369306000	precursor [M+2]	6058308096
MS1_T3R8_NoPTM	TKQTAR	375.2208++	H3_3-8	Ref2007_AS_21_181219	1	19.4393	171916000	precursor [M+2]	2718395392
MS1_T3R8_NoPTM	TKQTAR	375.2208++	H3_3-8	Ref2007_AS_22_181219	1	19.4594	212093900	precursor [M+2]	3375589888
MS1_T3R8_NoPTM	TKQTAR	375.2208++	H3_3-8	Ref2007_AS_23_181219	1	19.7078	395822100	precursor [M+2]	6075487744
MS1_T3R8_NoPTM	TKQTAR	375.2208++	H3_3-8	Ref2007_AS_24_181219	1	19.4593	489541300	precursor [M+2]	7787959808
MS1_T3R8_NoPTM	TKQTAR	375.2208++	H3_3-8	Ref2007_AS_25_181219	1	19.4794	407389200	precursor [M+2]	6657469952
MS1_T3R8_NoPTM	TKQTAR	375.2208++	H3_3-8	Ref2007_AS_26_181219	1	19.4593	331832700	precursor [M+2]	5485966848
MS1_T3R8_NoPTM	TKQTAR	375.2208++	H3_3-8	Ref2007_AS_27_181219	1	19.4795	571699300	precursor [M+2]	9171730432
MS1_T3R8_NoPTM	TKQTAR	375.2208++	H3_3-8	Ref2007_AS_28_181219	1	19.4192	280748400	precursor [M+2]	4510800384
MS1_T3R8_NoPTM	TKQTAR	375.2208++	H3_3-8	Ref2007_AS_29_181219	1	19.3991	516332900	precursor [M+2]	8239451648
MS1_T3R8_NoPTM	TKQTAR	375.2208++	H3_3-8	Ref2007_AS_30_181219	1	19.4392	547885900	precursor [M+2]	8778472448
MS1_T3R8_NoPTM	TKQTAR	375.2208++	H3_3-8	Ref2007_AS_31_181219	1	19.4995	367645300	precursor [M+2]	5771407360
MS1_T3R8_NoPTM	TKQTAR	375.2208++	H3_3-8	Ref2007_AS_32_181219	1	19.4593	230144200	precursor [M+2]	3676795392
MS1_T3R8_NoPTM	TKQTAR	375.2208++	H3_3-8	Ref2007_AS_33_181219	1	19.4794	344233700	precursor [M+2]	5549799936
MS1_T3R8_NoPTM	TKQTAR	375.2208++	H3_3-8	Ref2007_AS_34_181219	1	19.4191	261403600	precursor [M+2]	4170557440
MS1_T3R8_NoPTM	TKQTAR	375.2208++	H3_3-8	Ref2007_AS_35_181219	1	19.4794	368626600	precursor [M+2]	5955437568
MS1_T3R8_NoPTM	TKQTAR	375.2208++	H3_3-8	Ref2007_AS_QC0_181219	1	19.2985	276218100	precursor [M+2]	4336758784
MS1_T3R8_NoPTM	TKQTAR	375.2208++	H3_3-8	Ref2007_AS_QC1_181219	1	19.2784	206638100	precursor [M+2]	3232371200
MS1_T3R8_NoPTM	TKQTAR	375.2208++	H3_3-8	Ref2007_AS_QC2_181219	1	19.1779	344774800	precursor [M+2]	5481356288
MS1_T3R8_NoPTM	TKQTAR	375.2208++	H3_3-8	Ref2007_AS_QC3_181219	1	19.198	290872500	precursor [M+2]	4528756736
MS1_T3R8_NoPTM	TKQTAR	375.2208++	H3_3-8	Ref2007_AS_QC4_181219	1	19.1779	252179600	precursor [M+2]	3981477376
MS1_T3R8_NoPTM	TKQTAR	375.2208++	H3_3-8	Ref2007_AS_QC5_181219	1	19.178	185945900	precursor [M+2]	2930885888
MS1_T3R8_K4ac_do_not_use	TKQTAR	373.7114++	H3_3-8	blank_00	1	46.1348	3374389	precursor	4.234e+06
MS1_T3R8_K4ac_do_not_use	TKQTAR	373.7114++	H3_3-8	blank_01	1	45.529	3045222	precursor	3.88744e+06
MS1_T3R8_K4ac_do_not_use	TKQTAR	373.7114++	H3_3-8	Ref2007_AS_01_181219	1	19.9217	5728093	precursor	7481743
MS1_T3R8_K4ac_do_not_use	TKQTAR	373.7114++	H3_3-8	Ref2007_AS_02_181219	1	20.7055	43408750	precursor	73095056
MS1_T3R8_K4ac_do_not_use	TKQTAR	373.7114++	H3_3-8	Ref2007_AS_03_181219	1	20.4844	38720340	precursor	59670400
MS1_T3R8_K4ac_do_not_use	TKQTAR	373.7114++	H3_3-8	Ref2007_AS_04_181219	1	20.6453	45861640	precursor	71919752
MS1_T3R8_K4ac_do_not_use	TKQTAR	373.7114++	H3_3-8	Ref2007_AS_05_181219	1	20.6653	55334190	precursor	89072024
MS1_T3R8_K4ac_do_not_use	TKQTAR	373.7114++	H3_3-8	Ref2007_AS_06_181219	1	20.6251	44210110	precursor	71288456
MS1_T3R8_K4ac_do_not_use	TKQTAR	373.7114++	H3_3-8	Ref2007_AS_07_181219	1	20.5648	46363870	precursor	70230416
MS1_T3R8_K4ac_do_not_use	TKQTAR	373.7114++	H3_3-8	Ref2007_AS_08_181219	1	20.7056	55109780	precursor	95861304
MS1_T3R8_K4ac_do_not_use	TKQTAR	373.7114++	H3_3-8	Ref2007_AS_09_181219	1	20.6252	29873270	precursor	52679628
MS1_T3R8_K4ac_do_not_use	TKQTAR	373.7114++	H3_3-8	Ref2007_AS_10_181219	1	20.6854	75121660	precursor	115801072
MS1_T3R8_K4ac_do_not_use	TKQTAR	373.7114++	H3_3-8	Ref2007_AS_11_181219	1	20.5246	32153680	precursor	53571140
MS1_T3R8_K4ac_do_not_use	TKQTAR	373.7114++	H3_3-8	Ref2007_AS_12_181219	1	20.7458	62724640	precursor	106130536
MS1_T3R8_K4ac_do_not_use	TKQTAR	373.7114++	H3_3-8	Ref2007_AS_13_181219	1	20.6051	47240810	precursor	71399040
MS1_T3R8_K4ac_do_not_use	TKQTAR	373.7114++	H3_3-8	Ref2007_AS_14_181219	1	20.6251	65396840	precursor	106140992
MS1_T3R8_K4ac_do_not_use	TKQTAR	373.7114++	H3_3-8	Ref2007_AS_15_181219	1	20.6452	61897940	precursor	107642448
MS1_T3R8_K4ac_do_not_use	TKQTAR	373.7114++	H3_3-8	Ref2007_AS_16_181219	1	20.7659	63497580	precursor	100624640
MS1_T3R8_K4ac_do_not_use	TKQTAR	373.7114++	H3_3-8	Ref2007_AS_17_181219	1	20.6855	55565070	precursor	107332848
MS1_T3R8_K4ac_do_not_use	TKQTAR	373.7114++	H3_3-8	Ref2007_AS_18_181219	1	20.6654	40277650	precursor	78274424
MS1_T3R8_K4ac_do_not_use	TKQTAR	373.7114++	H3_3-8	Ref2007_AS_19_181219	1	20.5648	25176170	precursor	40518392
MS1_T3R8_K4ac_do_not_use	TKQTAR	373.7114++	H3_3-8	Ref2007_AS_20_181219	1	20.6453	44898230	precursor	80563888
MS1_T3R8_K4ac_do_not_use	TKQTAR	373.7114++	H3_3-8	Ref2007_AS_21_181219	1	20.585	40532240	precursor	72115152
MS1_T3R8_K4ac_do_not_use	TKQTAR	373.7114++	H3_3-8	Ref2007_AS_22_181219	1	20.6654	38340080	precursor	75691928
MS1_T3R8_K4ac_do_not_use	TKQTAR	373.7114++	H3_3-8	Ref2007_AS_23_181219	1	21.4255	54381670	precursor	79828976
MS1_T3R8_K4ac_do_not_use	TKQTAR	373.7114++	H3_3-8	Ref2007_AS_24_181219	1	20.6251	69695800	precursor	114517632
MS1_T3R8_K4ac_do_not_use	TKQTAR	373.7114++	H3_3-8	Ref2007_AS_25_181219	1	30.8158	39425970	precursor	52815148
MS1_T3R8_K4ac_do_not_use	TKQTAR	373.7114++	H3_3-8	Ref2007_AS_26_181219	1	20.6653	66674160	precursor	101374848
MS1_T3R8_K4ac_do_not_use	TKQTAR	373.7114++	H3_3-8	Ref2007_AS_27_181219	1	20.7056	66418420	precursor	113065840
MS1_T3R8_K4ac_do_not_use	TKQTAR	373.7114++	H3_3-8	Ref2007_AS_28_181219	1	20.5448	41912700	precursor	68184424
MS1_T3R8_K4ac_do_not_use	TKQTAR	373.7114++	H3_3-8	Ref2007_AS_29_181219	1	20.5046	55953710	precursor	93682704
MS1_T3R8_K4ac_do_not_use	TKQTAR	373.7114++	H3_3-8	Ref2007_AS_30_181219	1	30.2329	35092180	precursor	46346824
MS1_T3R8_K4ac_do_not_use	TKQTAR	373.7114++	H3_3-8	Ref2007_AS_31_181219	1	20.7457	41643500	precursor	81851200
MS1_T3R8_K4ac_do_not_use	TKQTAR	373.7114++	H3_3-8	Ref2007_AS_32_181219	1	20.6452	47596760	precursor	84206680
MS1_T3R8_K4ac_do_not_use	TKQTAR	373.7114++	H3_3-8	Ref2007_AS_33_181219	1	30.9163	39205910	precursor	52488060
MS1_T3R8_K4ac_do_not_use	TKQTAR	373.7114++	H3_3-8	Ref2007_AS_34_181219	1	20.5045	48995560	precursor	77399664
MS1_T3R8_K4ac_do_not_use	TKQTAR	373.7114++	H3_3-8	Ref2007_AS_35_181219	1	30.3133	41466360	precursor	54067676
MS1_T3R8_K4ac_do_not_use	TKQTAR	373.7114++	H3_3-8	Ref2007_AS_QC0_181219	1	20.8462	36342940	precursor	53865964
MS1_T3R8_K4ac_do_not_use	TKQTAR	373.7114++	H3_3-8	Ref2007_AS_QC1_181219	1	20.7055	32839420	precursor	48116476
MS1_T3R8_K4ac_do_not_use	TKQTAR	373.7114++	H3_3-8	Ref2007_AS_QC2_181219	1	20.5447	49211820	precursor	85360808
MS1_T3R8_K4ac_do_not_use	TKQTAR	373.7114++	H3_3-8	Ref2007_AS_QC3_181219	1	20.6452	35150200	precursor	66899728
MS1_T3R8_K4ac_do_not_use	TKQTAR	373.7114++	H3_3-8	Ref2007_AS_QC4_181219	1	20.4844	32344600	precursor	58385848
MS1_T3R8_K4ac_do_not_use	TKQTAR	373.7114++	H3_3-8	Ref2007_AS_QC5_181219	1	20.5046	28636270	precursor	48551600
MS1_T3R8_K4ac_do_not_use	TKQTAR	373.7114++	H3_3-8	blank_00	1	46.1348	796157	precursor [M+1]	4.234e+06
MS1_T3R8_K4ac_do_not_use	TKQTAR	373.7114++	H3_3-8	blank_01	1	45.529	820960	precursor [M+1]	3.88744e+06
MS1_T3R8_K4ac_do_not_use	TKQTAR	373.7114++	H3_3-8	Ref2007_AS_01_181219	1	19.9217	1274243	precursor [M+1]	7481743
MS1_T3R8_K4ac_do_not_use	TKQTAR	373.7114++	H3_3-8	Ref2007_AS_02_181219	1	20.7055	25718230	precursor [M+1]	73095056
MS1_T3R8_K4ac_do_not_use	TKQTAR	373.7114++	H3_3-8	Ref2007_AS_03_181219	1	20.4844	17082280	precursor [M+1]	59670400
MS1_T3R8_K4ac_do_not_use	TKQTAR	373.7114++	H3_3-8	Ref2007_AS_04_181219	1	20.6453	21785620	precursor [M+1]	71919752
MS1_T3R8_K4ac_do_not_use	TKQTAR	373.7114++	H3_3-8	Ref2007_AS_05_181219	1	20.6653	28606220	precursor [M+1]	89072024
MS1_T3R8_K4ac_do_not_use	TKQTAR	373.7114++	H3_3-8	Ref2007_AS_06_181219	1	20.6251	22833430	precursor [M+1]	71288456
MS1_T3R8_K4ac_do_not_use	TKQTAR	373.7114++	H3_3-8	Ref2007_AS_07_181219	1	20.5648	19366100	precursor [M+1]	70230416
MS1_T3R8_K4ac_do_not_use	TKQTAR	373.7114++	H3_3-8	Ref2007_AS_08_181219	1	20.7056	35252590	precursor [M+1]	95861304
MS1_T3R8_K4ac_do_not_use	TKQTAR	373.7114++	H3_3-8	Ref2007_AS_09_181219	1	20.6252	20240680	precursor [M+1]	52679628
MS1_T3R8_K4ac_do_not_use	TKQTAR	373.7114++	H3_3-8	Ref2007_AS_10_181219	1	20.6854	34081430	precursor [M+1]	115801072
MS1_T3R8_K4ac_do_not_use	TKQTAR	373.7114++	H3_3-8	Ref2007_AS_11_181219	1	20.5246	18399040	precursor [M+1]	53571140
MS1_T3R8_K4ac_do_not_use	TKQTAR	373.7114++	H3_3-8	Ref2007_AS_12_181219	1	20.7458	37527480	precursor [M+1]	106130536
MS1_T3R8_K4ac_do_not_use	TKQTAR	373.7114++	H3_3-8	Ref2007_AS_13_181219	1	20.6051	20149340	precursor [M+1]	71399040
MS1_T3R8_K4ac_do_not_use	TKQTAR	373.7114++	H3_3-8	Ref2007_AS_14_181219	1	20.6251	34870120	precursor [M+1]	106140992
MS1_T3R8_K4ac_do_not_use	TKQTAR	373.7114++	H3_3-8	Ref2007_AS_15_181219	1	20.6452	39062680	precursor [M+1]	107642448
MS1_T3R8_K4ac_do_not_use	TKQTAR	373.7114++	H3_3-8	Ref2007_AS_16_181219	1	20.7659	30746180	precursor [M+1]	100624640
MS1_T3R8_K4ac_do_not_use	TKQTAR	373.7114++	H3_3-8	Ref2007_AS_17_181219	1	20.6855	46497470	precursor [M+1]	107332848
MS1_T3R8_K4ac_do_not_use	TKQTAR	373.7114++	H3_3-8	Ref2007_AS_18_181219	1	20.6654	34311770	precursor [M+1]	78274424
MS1_T3R8_K4ac_do_not_use	TKQTAR	373.7114++	H3_3-8	Ref2007_AS_19_181219	1	20.5648	13009470	precursor [M+1]	40518392
MS1_T3R8_K4ac_do_not_use	TKQTAR	373.7114++	H3_3-8	Ref2007_AS_20_181219	1	20.6453	31695360	precursor [M+1]	80563888
MS1_T3R8_K4ac_do_not_use	TKQTAR	373.7114++	H3_3-8	Ref2007_AS_21_181219	1	20.585	27638530	precursor [M+1]	72115152
MS1_T3R8_K4ac_do_not_use	TKQTAR	373.7114++	H3_3-8	Ref2007_AS_22_181219	1	20.6654	33728850	precursor [M+1]	75691928
MS1_T3R8_K4ac_do_not_use	TKQTAR	373.7114++	H3_3-8	Ref2007_AS_23_181219	1	21.4255	20369310	precursor [M+1]	79828976
MS1_T3R8_K4ac_do_not_use	TKQTAR	373.7114++	H3_3-8	Ref2007_AS_24_181219	1	20.6251	38425410	precursor [M+1]	114517632
MS1_T3R8_K4ac_do_not_use	TKQTAR	373.7114++	H3_3-8	Ref2007_AS_25_181219	1	30.8158	11502100	precursor [M+1]	52815148
MS1_T3R8_K4ac_do_not_use	TKQTAR	373.7114++	H3_3-8	Ref2007_AS_26_181219	1	20.6653	28676540	precursor [M+1]	101374848
MS1_T3R8_K4ac_do_not_use	TKQTAR	373.7114++	H3_3-8	Ref2007_AS_27_181219	1	20.7056	40247890	precursor [M+1]	113065840
MS1_T3R8_K4ac_do_not_use	TKQTAR	373.7114++	H3_3-8	Ref2007_AS_28_181219	1	20.5448	22339090	precursor [M+1]	68184424
MS1_T3R8_K4ac_do_not_use	TKQTAR	373.7114++	H3_3-8	Ref2007_AS_29_181219	1	20.5046	32565830	precursor [M+1]	93682704
MS1_T3R8_K4ac_do_not_use	TKQTAR	373.7114++	H3_3-8	Ref2007_AS_30_181219	1	30.2329	9578011	precursor [M+1]	46346824
MS1_T3R8_K4ac_do_not_use	TKQTAR	373.7114++	H3_3-8	Ref2007_AS_31_181219	1	20.7457	36361990	precursor [M+1]	81851200
MS1_T3R8_K4ac_do_not_use	TKQTAR	373.7114++	H3_3-8	Ref2007_AS_32_181219	1	20.6452	31637170	precursor [M+1]	84206680
MS1_T3R8_K4ac_do_not_use	TKQTAR	373.7114++	H3_3-8	Ref2007_AS_33_181219	1	30.9163	11375990	precursor [M+1]	52488060
MS1_T3R8_K4ac_do_not_use	TKQTAR	373.7114++	H3_3-8	Ref2007_AS_34_181219	1	20.5045	23927660	precursor [M+1]	77399664
MS1_T3R8_K4ac_do_not_use	TKQTAR	373.7114++	H3_3-8	Ref2007_AS_35_181219	1	30.3133	10412160	precursor [M+1]	54067676
MS1_T3R8_K4ac_do_not_use	TKQTAR	373.7114++	H3_3-8	Ref2007_AS_QC0_181219	1	20.8462	14179700	precursor [M+1]	53865964
MS1_T3R8_K4ac_do_not_use	TKQTAR	373.7114++	H3_3-8	Ref2007_AS_QC1_181219	1	20.7055	12124890	precursor [M+1]	48116476
MS1_T3R8_K4ac_do_not_use	TKQTAR	373.7114++	H3_3-8	Ref2007_AS_QC2_181219	1	20.5447	31588310	precursor [M+1]	85360808
MS1_T3R8_K4ac_do_not_use	TKQTAR	373.7114++	H3_3-8	Ref2007_AS_QC3_181219	1	20.6452	28566090	precursor [M+1]	66899728
MS1_T3R8_K4ac_do_not_use	TKQTAR	373.7114++	H3_3-8	Ref2007_AS_QC4_181219	1	20.4844	23120960	precursor [M+1]	58385848
MS1_T3R8_K4ac_do_not_use	TKQTAR	373.7114++	H3_3-8	Ref2007_AS_QC5_181219	1	20.5046	17216550	precursor [M+1]	48551600
MS1_T3R8_K4ac_do_not_use	TKQTAR	373.7114++	H3_3-8	blank_00	1	46.1348	63451	precursor [M+2]	4.234e+06
MS1_T3R8_K4ac_do_not_use	TKQTAR	373.7114++	H3_3-8	blank_01	1	45.529	21255	precursor [M+2]	3.88744e+06
MS1_T3R8_K4ac_do_not_use	TKQTAR	373.7114++	H3_3-8	Ref2007_AS_01_181219	1	19.9217	479408	precursor [M+2]	7481743
MS1_T3R8_K4ac_do_not_use	TKQTAR	373.7114++	H3_3-8	Ref2007_AS_02_181219	1	20.7055	3968073	precursor [M+2]	73095056
MS1_T3R8_K4ac_do_not_use	TKQTAR	373.7114++	H3_3-8	Ref2007_AS_03_181219	1	20.4844	3867786	precursor [M+2]	59670400
MS1_T3R8_K4ac_do_not_use	TKQTAR	373.7114++	H3_3-8	Ref2007_AS_04_181219	1	20.6453	4272494	precursor [M+2]	71919752
MS1_T3R8_K4ac_do_not_use	TKQTAR	373.7114++	H3_3-8	Ref2007_AS_05_181219	1	20.6653	5131608	precursor [M+2]	89072024
MS1_T3R8_K4ac_do_not_use	TKQTAR	373.7114++	H3_3-8	Ref2007_AS_06_181219	1	20.6251	4244920	precursor [M+2]	71288456
MS1_T3R8_K4ac_do_not_use	TKQTAR	373.7114++	H3_3-8	Ref2007_AS_07_181219	1	20.5648	4500444	precursor [M+2]	70230416
MS1_T3R8_K4ac_do_not_use	TKQTAR	373.7114++	H3_3-8	Ref2007_AS_08_181219	1	20.7056	5498929	precursor [M+2]	95861304
MS1_T3R8_K4ac_do_not_use	TKQTAR	373.7114++	H3_3-8	Ref2007_AS_09_181219	1	20.6252	2565685	precursor [M+2]	52679628
MS1_T3R8_K4ac_do_not_use	TKQTAR	373.7114++	H3_3-8	Ref2007_AS_10_181219	1	20.6854	6597988	precursor [M+2]	115801072
MS1_T3R8_K4ac_do_not_use	TKQTAR	373.7114++	H3_3-8	Ref2007_AS_11_181219	1	20.5246	3018419	precursor [M+2]	53571140
MS1_T3R8_K4ac_do_not_use	TKQTAR	373.7114++	H3_3-8	Ref2007_AS_12_181219	1	20.7458	5878410	precursor [M+2]	106130536
MS1_T3R8_K4ac_do_not_use	TKQTAR	373.7114++	H3_3-8	Ref2007_AS_13_181219	1	20.6051	4008894	precursor [M+2]	71399040
MS1_T3R8_K4ac_do_not_use	TKQTAR	373.7114++	H3_3-8	Ref2007_AS_14_181219	1	20.6251	5874042	precursor [M+2]	106140992
MS1_T3R8_K4ac_do_not_use	TKQTAR	373.7114++	H3_3-8	Ref2007_AS_15_181219	1	20.6452	6681824	precursor [M+2]	107642448
MS1_T3R8_K4ac_do_not_use	TKQTAR	373.7114++	H3_3-8	Ref2007_AS_16_181219	1	20.7659	6380884	precursor [M+2]	100624640
MS1_T3R8_K4ac_do_not_use	TKQTAR	373.7114++	H3_3-8	Ref2007_AS_17_181219	1	20.6855	5270304	precursor [M+2]	107332848
MS1_T3R8_K4ac_do_not_use	TKQTAR	373.7114++	H3_3-8	Ref2007_AS_18_181219	1	20.6654	3685000	precursor [M+2]	78274424
MS1_T3R8_K4ac_do_not_use	TKQTAR	373.7114++	H3_3-8	Ref2007_AS_19_181219	1	20.5648	2332751	precursor [M+2]	40518392
MS1_T3R8_K4ac_do_not_use	TKQTAR	373.7114++	H3_3-8	Ref2007_AS_20_181219	1	20.6453	3970297	precursor [M+2]	80563888
MS1_T3R8_K4ac_do_not_use	TKQTAR	373.7114++	H3_3-8	Ref2007_AS_21_181219	1	20.585	3944381	precursor [M+2]	72115152
MS1_T3R8_K4ac_do_not_use	TKQTAR	373.7114++	H3_3-8	Ref2007_AS_22_181219	1	20.6654	3622996	precursor [M+2]	75691928
MS1_T3R8_K4ac_do_not_use	TKQTAR	373.7114++	H3_3-8	Ref2007_AS_23_181219	1	21.4255	5077990	precursor [M+2]	79828976
MS1_T3R8_K4ac_do_not_use	TKQTAR	373.7114++	H3_3-8	Ref2007_AS_24_181219	1	20.6251	6396428	precursor [M+2]	114517632
MS1_T3R8_K4ac_do_not_use	TKQTAR	373.7114++	H3_3-8	Ref2007_AS_25_181219	1	30.8158	1887071	precursor [M+2]	52815148
MS1_T3R8_K4ac_do_not_use	TKQTAR	373.7114++	H3_3-8	Ref2007_AS_26_181219	1	20.6653	6024142	precursor [M+2]	101374848
MS1_T3R8_K4ac_do_not_use	TKQTAR	373.7114++	H3_3-8	Ref2007_AS_27_181219	1	20.7056	6399533	precursor [M+2]	113065840
MS1_T3R8_K4ac_do_not_use	TKQTAR	373.7114++	H3_3-8	Ref2007_AS_28_181219	1	20.5448	3932635	precursor [M+2]	68184424
MS1_T3R8_K4ac_do_not_use	TKQTAR	373.7114++	H3_3-8	Ref2007_AS_29_181219	1	20.5046	5163159	precursor [M+2]	93682704
MS1_T3R8_K4ac_do_not_use	TKQTAR	373.7114++	H3_3-8	Ref2007_AS_30_181219	1	30.2329	1676635	precursor [M+2]	46346824
MS1_T3R8_K4ac_do_not_use	TKQTAR	373.7114++	H3_3-8	Ref2007_AS_31_181219	1	20.7457	3845714	precursor [M+2]	81851200
MS1_T3R8_K4ac_do_not_use	TKQTAR	373.7114++	H3_3-8	Ref2007_AS_32_181219	1	20.6452	4972752	precursor [M+2]	84206680
MS1_T3R8_K4ac_do_not_use	TKQTAR	373.7114++	H3_3-8	Ref2007_AS_33_181219	1	30.9163	1906165	precursor [M+2]	52488060
MS1_T3R8_K4ac_do_not_use	TKQTAR	373.7114++	H3_3-8	Ref2007_AS_34_181219	1	20.5045	4476444	precursor [M+2]	77399664
MS1_T3R8_K4ac_do_not_use	TKQTAR	373.7114++	H3_3-8	Ref2007_AS_35_181219	1	30.3133	2189154	precursor [M+2]	54067676
MS1_T3R8_K4ac_do_not_use	TKQTAR	373.7114++	H3_3-8	Ref2007_AS_QC0_181219	1	20.8462	3343323	precursor [M+2]	53865964
MS1_T3R8_K4ac_do_not_use	TKQTAR	373.7114++	H3_3-8	Ref2007_AS_QC1_181219	1	20.7055	3152162	precursor [M+2]	48116476
MS1_T3R8_K4ac_do_not_use	TKQTAR	373.7114++	H3_3-8	Ref2007_AS_QC2_181219	1	20.5447	4560669	precursor [M+2]	85360808
MS1_T3R8_K4ac_do_not_use	TKQTAR	373.7114++	H3_3-8	Ref2007_AS_QC3_181219	1	20.6452	3183438	precursor [M+2]	66899728
MS1_T3R8_K4ac_do_not_use	TKQTAR	373.7114++	H3_3-8	Ref2007_AS_QC4_181219	1	20.4844	2920295	precursor [M+2]	58385848
MS1_T3R8_K4ac_do_not_use	TKQTAR	373.7114++	H3_3-8	Ref2007_AS_QC5_181219	1	20.5046	2698786	precursor [M+2]	48551600
MS1_T3R8_K4me1	TKQTAR	382.2286++	H3_3-8	blank_00	1	59.309	1467177	precursor	1994694
MS1_T3R8_K4me1	TKQTAR	382.2286++	H3_3-8	blank_01	1	58.8955	349848	precursor	425600
MS1_T3R8_K4me1	TKQTAR	382.2286++	H3_3-8	Ref2007_AS_01_181219	1	20.6252	1223533000	precursor	1807193472
MS1_T3R8_K4me1	TKQTAR	382.2286++	H3_3-8	Ref2007_AS_02_181219	1	20.5648	1029572000	precursor	1521403008
MS1_T3R8_K4me1	TKQTAR	382.2286++	H3_3-8	Ref2007_AS_03_181219	1	20.3437	1110341000	precursor	1640968576
MS1_T3R8_K4me1	TKQTAR	382.2286++	H3_3-8	Ref2007_AS_04_181219	1	20.5247	1020069000	precursor	1501091200
MS1_T3R8_K4me1	TKQTAR	382.2286++	H3_3-8	Ref2007_AS_05_181219	1	20.5447	1286593000	precursor	1898867584
MS1_T3R8_K4me1	TKQTAR	382.2286++	H3_3-8	Ref2007_AS_06_181219	1	20.4643	854583200	precursor	1262871168
MS1_T3R8_K4me1	TKQTAR	382.2286++	H3_3-8	Ref2007_AS_07_181219	1	20.4241	975499500	precursor	1441194496
MS1_T3R8_K4me1	TKQTAR	382.2286++	H3_3-8	Ref2007_AS_08_181219	1	20.6051	1626587000	precursor	2398156032
MS1_T3R8_K4me1	TKQTAR	382.2286++	H3_3-8	Ref2007_AS_09_181219	1	20.5046	1090371000	precursor	1605299968
MS1_T3R8_K4me1	TKQTAR	382.2286++	H3_3-8	Ref2007_AS_10_181219	1	20.5447	1389343000	precursor	2057255296
MS1_T3R8_K4me1	TKQTAR	382.2286++	H3_3-8	Ref2007_AS_11_181219	1	20.3638	814146900	precursor	1202801280
MS1_T3R8_K4me1	TKQTAR	382.2286++	H3_3-8	Ref2007_AS_12_181219	1	20.6051	1152699000	precursor	1698234496
MS1_T3R8_K4me1	TKQTAR	382.2286++	H3_3-8	Ref2007_AS_13_181219	1	20.4644	1076457000	precursor	1586383232
MS1_T3R8_K4me1	TKQTAR	382.2286++	H3_3-8	Ref2007_AS_14_181219	1	20.5045	1813360000	precursor	2676731648
MS1_T3R8_K4me1	TKQTAR	382.2286++	H3_3-8	Ref2007_AS_15_181219	1	20.5045	1560301000	precursor	2293193728
MS1_T3R8_K4me1	TKQTAR	382.2286++	H3_3-8	Ref2007_AS_16_181219	1	20.6051	1665043000	precursor	2463175168
MS1_T3R8_K4me1	TKQTAR	382.2286++	H3_3-8	Ref2007_AS_17_181219	1	20.5649	1106139000	precursor	1637632256
MS1_T3R8_K4me1	TKQTAR	382.2286++	H3_3-8	Ref2007_AS_18_181219	1	20.5046	854445600	precursor	1264539392
MS1_T3R8_K4me1	TKQTAR	382.2286++	H3_3-8	Ref2007_AS_19_181219	1	20.404	700290200	precursor	1035332096
MS1_T3R8_K4me1	TKQTAR	382.2286++	H3_3-8	Ref2007_AS_20_181219	1	20.5046	1554879000	precursor	2289750272
MS1_T3R8_K4me1	TKQTAR	382.2286++	H3_3-8	Ref2007_AS_21_181219	1	20.4242	1350159000	precursor	1995477632
MS1_T3R8_K4me1	TKQTAR	382.2286++	H3_3-8	Ref2007_AS_22_181219	1	20.5247	745984500	precursor	1098873600
MS1_T3R8_K4me1	TKQTAR	382.2286++	H3_3-8	Ref2007_AS_23_181219	1	21.2518	1658078000	precursor	2448126976
MS1_T3R8_K4me1	TKQTAR	382.2286++	H3_3-8	Ref2007_AS_24_181219	1	20.4844	1251232000	precursor	1848034688
MS1_T3R8_K4me1	TKQTAR	382.2286++	H3_3-8	Ref2007_AS_25_181219	1	20.6251	1102547000	precursor	1625401856
MS1_T3R8_K4me1	TKQTAR	382.2286++	H3_3-8	Ref2007_AS_26_181219	1	20.5447	1331214000	precursor	1963034624
MS1_T3R8_K4me1	TKQTAR	382.2286++	H3_3-8	Ref2007_AS_27_181219	1	20.585	1530694000	precursor	2260824832
MS1_T3R8_K4me1	TKQTAR	382.2286++	H3_3-8	Ref2007_AS_28_181219	1	20.4041	1116643000	precursor	1649292032
MS1_T3R8_K4me1	TKQTAR	382.2286++	H3_3-8	Ref2007_AS_29_181219	1	20.384	1638695000	precursor	2424051712
MS1_T3R8_K4me1	TKQTAR	382.2286++	H3_3-8	Ref2007_AS_30_181219	1	20.5246	1528536000	precursor	2258464768
MS1_T3R8_K4me1	TKQTAR	382.2286++	H3_3-8	Ref2007_AS_31_181219	1	20.5849	944205000	precursor	1395725312
MS1_T3R8_K4me1	TKQTAR	382.2286++	H3_3-8	Ref2007_AS_32_181219	1	20.4844	742691600	precursor	1096934016
MS1_T3R8_K4me1	TKQTAR	382.2286++	H3_3-8	Ref2007_AS_33_181219	1	20.6251	934515800	precursor	1386101376
MS1_T3R8_K4me1	TKQTAR	382.2286++	H3_3-8	Ref2007_AS_34_181219	1	20.3638	774162900	precursor	1140949248
MS1_T3R8_K4me1	TKQTAR	382.2286++	H3_3-8	Ref2007_AS_35_181219	1	20.5246	1051149000	precursor	1552311808
MS1_T3R8_K4me1	TKQTAR	382.2286++	H3_3-8	Ref2007_AS_QC0_181219	1	20.7256	984908300	precursor	1456827904
MS1_T3R8_K4me1	TKQTAR	382.2286++	H3_3-8	Ref2007_AS_QC1_181219	1	20.5447	771116600	precursor	1139588992
MS1_T3R8_K4me1	TKQTAR	382.2286++	H3_3-8	Ref2007_AS_QC2_181219	1	20.4241	1209610000	precursor	1789998976
MS1_T3R8_K4me1	TKQTAR	382.2286++	H3_3-8	Ref2007_AS_QC3_181219	1	20.5045	957351000	precursor	1416386176
MS1_T3R8_K4me1	TKQTAR	382.2286++	H3_3-8	Ref2007_AS_QC4_181219	1	20.3437	839829100	precursor	1242413056
MS1_T3R8_K4me1	TKQTAR	382.2286++	H3_3-8	Ref2007_AS_QC5_181219	1	20.384	715153900	precursor	1053756352
MS1_T3R8_K4me1	TKQTAR	382.2286++	H3_3-8	blank_00	1	59.309	464873	precursor [M+1]	1994694
MS1_T3R8_K4me1	TKQTAR	382.2286++	H3_3-8	blank_01	1	58.8955	66893	precursor [M+1]	425600
MS1_T3R8_K4me1	TKQTAR	382.2286++	H3_3-8	Ref2007_AS_01_181219	1	20.6252	470150000	precursor [M+1]	1807193472
MS1_T3R8_K4me1	TKQTAR	382.2286++	H3_3-8	Ref2007_AS_02_181219	1	20.5648	395732000	precursor [M+1]	1521403008
MS1_T3R8_K4me1	TKQTAR	382.2286++	H3_3-8	Ref2007_AS_03_181219	1	20.3437	422983600	precursor [M+1]	1640968576
MS1_T3R8_K4me1	TKQTAR	382.2286++	H3_3-8	Ref2007_AS_04_181219	1	20.5247	386875400	precursor [M+1]	1501091200
MS1_T3R8_K4me1	TKQTAR	382.2286++	H3_3-8	Ref2007_AS_05_181219	1	20.5447	490929900	precursor [M+1]	1898867584
MS1_T3R8_K4me1	TKQTAR	382.2286++	H3_3-8	Ref2007_AS_06_181219	1	20.4643	328795600	precursor [M+1]	1262871168
MS1_T3R8_K4me1	TKQTAR	382.2286++	H3_3-8	Ref2007_AS_07_181219	1	20.4241	370085200	precursor [M+1]	1441194496
MS1_T3R8_K4me1	TKQTAR	382.2286++	H3_3-8	Ref2007_AS_08_181219	1	20.6051	620032400	precursor [M+1]	2398156032
MS1_T3R8_K4me1	TKQTAR	382.2286++	H3_3-8	Ref2007_AS_09_181219	1	20.5046	414043600	precursor [M+1]	1605299968
MS1_T3R8_K4me1	TKQTAR	382.2286++	H3_3-8	Ref2007_AS_10_181219	1	20.5447	536368200	precursor [M+1]	2057255296
MS1_T3R8_K4me1	TKQTAR	382.2286++	H3_3-8	Ref2007_AS_11_181219	1	20.3638	311807700	precursor [M+1]	1202801280
MS1_T3R8_K4me1	TKQTAR	382.2286++	H3_3-8	Ref2007_AS_12_181219	1	20.6051	438783100	precursor [M+1]	1698234496
MS1_T3R8_K4me1	TKQTAR	382.2286++	H3_3-8	Ref2007_AS_13_181219	1	20.4644	410698100	precursor [M+1]	1586383232
MS1_T3R8_K4me1	TKQTAR	382.2286++	H3_3-8	Ref2007_AS_14_181219	1	20.5045	693457700	precursor [M+1]	2676731648
MS1_T3R8_K4me1	TKQTAR	382.2286++	H3_3-8	Ref2007_AS_15_181219	1	20.5045	590357800	precursor [M+1]	2293193728
MS1_T3R8_K4me1	TKQTAR	382.2286++	H3_3-8	Ref2007_AS_16_181219	1	20.6051	639722700	precursor [M+1]	2463175168
MS1_T3R8_K4me1	TKQTAR	382.2286++	H3_3-8	Ref2007_AS_17_181219	1	20.5649	426193200	precursor [M+1]	1637632256
MS1_T3R8_K4me1	TKQTAR	382.2286++	H3_3-8	Ref2007_AS_18_181219	1	20.5046	328844500	precursor [M+1]	1264539392
MS1_T3R8_K4me1	TKQTAR	382.2286++	H3_3-8	Ref2007_AS_19_181219	1	20.404	267235200	precursor [M+1]	1035332096
MS1_T3R8_K4me1	TKQTAR	382.2286++	H3_3-8	Ref2007_AS_20_181219	1	20.5046	591561800	precursor [M+1]	2289750272
MS1_T3R8_K4me1	TKQTAR	382.2286++	H3_3-8	Ref2007_AS_21_181219	1	20.4242	514216800	precursor [M+1]	1995477632
MS1_T3R8_K4me1	TKQTAR	382.2286++	H3_3-8	Ref2007_AS_22_181219	1	20.5247	283530600	precursor [M+1]	1098873600
MS1_T3R8_K4me1	TKQTAR	382.2286++	H3_3-8	Ref2007_AS_23_181219	1	21.2518	634094300	precursor [M+1]	2448126976
MS1_T3R8_K4me1	TKQTAR	382.2286++	H3_3-8	Ref2007_AS_24_181219	1	20.4844	481094800	precursor [M+1]	1848034688
MS1_T3R8_K4me1	TKQTAR	382.2286++	H3_3-8	Ref2007_AS_25_181219	1	20.6251	421089100	precursor [M+1]	1625401856
MS1_T3R8_K4me1	TKQTAR	382.2286++	H3_3-8	Ref2007_AS_26_181219	1	20.5447	507802600	precursor [M+1]	1963034624
MS1_T3R8_K4me1	TKQTAR	382.2286++	H3_3-8	Ref2007_AS_27_181219	1	20.585	585823000	precursor [M+1]	2260824832
MS1_T3R8_K4me1	TKQTAR	382.2286++	H3_3-8	Ref2007_AS_28_181219	1	20.4041	427726600	precursor [M+1]	1649292032
MS1_T3R8_K4me1	TKQTAR	382.2286++	H3_3-8	Ref2007_AS_29_181219	1	20.384	632936400	precursor [M+1]	2424051712
MS1_T3R8_K4me1	TKQTAR	382.2286++	H3_3-8	Ref2007_AS_30_181219	1	20.5246	587593800	precursor [M+1]	2258464768
MS1_T3R8_K4me1	TKQTAR	382.2286++	H3_3-8	Ref2007_AS_31_181219	1	20.5849	362522100	precursor [M+1]	1395725312
MS1_T3R8_K4me1	TKQTAR	382.2286++	H3_3-8	Ref2007_AS_32_181219	1	20.4844	284471500	precursor [M+1]	1096934016
MS1_T3R8_K4me1	TKQTAR	382.2286++	H3_3-8	Ref2007_AS_33_181219	1	20.6251	363255000	precursor [M+1]	1386101376
MS1_T3R8_K4me1	TKQTAR	382.2286++	H3_3-8	Ref2007_AS_34_181219	1	20.3638	294696100	precursor [M+1]	1140949248
MS1_T3R8_K4me1	TKQTAR	382.2286++	H3_3-8	Ref2007_AS_35_181219	1	20.5246	404129900	precursor [M+1]	1552311808
MS1_T3R8_K4me1	TKQTAR	382.2286++	H3_3-8	Ref2007_AS_QC0_181219	1	20.7256	378492300	precursor [M+1]	1456827904
MS1_T3R8_K4me1	TKQTAR	382.2286++	H3_3-8	Ref2007_AS_QC1_181219	1	20.5447	295263600	precursor [M+1]	1139588992
MS1_T3R8_K4me1	TKQTAR	382.2286++	H3_3-8	Ref2007_AS_QC2_181219	1	20.4241	466495600	precursor [M+1]	1789998976
MS1_T3R8_K4me1	TKQTAR	382.2286++	H3_3-8	Ref2007_AS_QC3_181219	1	20.5045	368285400	precursor [M+1]	1416386176
MS1_T3R8_K4me1	TKQTAR	382.2286++	H3_3-8	Ref2007_AS_QC4_181219	1	20.3437	323843400	precursor [M+1]	1242413056
MS1_T3R8_K4me1	TKQTAR	382.2286++	H3_3-8	Ref2007_AS_QC5_181219	1	20.384	271678800	precursor [M+1]	1053756352
MS1_T3R8_K4me1	TKQTAR	382.2286++	H3_3-8	blank_00	1	59.309	62645	precursor [M+2]	1994694
MS1_T3R8_K4me1	TKQTAR	382.2286++	H3_3-8	blank_01	1	58.8955	8859	precursor [M+2]	425600
MS1_T3R8_K4me1	TKQTAR	382.2286++	H3_3-8	Ref2007_AS_01_181219	1	20.6252	113510800	precursor [M+2]	1807193472
MS1_T3R8_K4me1	TKQTAR	382.2286++	H3_3-8	Ref2007_AS_02_181219	1	20.5648	96099460	precursor [M+2]	1521403008
MS1_T3R8_K4me1	TKQTAR	382.2286++	H3_3-8	Ref2007_AS_03_181219	1	20.3437	107643700	precursor [M+2]	1640968576
MS1_T3R8_K4me1	TKQTAR	382.2286++	H3_3-8	Ref2007_AS_04_181219	1	20.5247	94146620	precursor [M+2]	1501091200
MS1_T3R8_K4me1	TKQTAR	382.2286++	H3_3-8	Ref2007_AS_05_181219	1	20.5447	121344400	precursor [M+2]	1898867584
MS1_T3R8_K4me1	TKQTAR	382.2286++	H3_3-8	Ref2007_AS_06_181219	1	20.4643	79492300	precursor [M+2]	1262871168
MS1_T3R8_K4me1	TKQTAR	382.2286++	H3_3-8	Ref2007_AS_07_181219	1	20.4241	95609830	precursor [M+2]	1441194496
MS1_T3R8_K4me1	TKQTAR	382.2286++	H3_3-8	Ref2007_AS_08_181219	1	20.6051	151536900	precursor [M+2]	2398156032
MS1_T3R8_K4me1	TKQTAR	382.2286++	H3_3-8	Ref2007_AS_09_181219	1	20.5046	100885000	precursor [M+2]	1605299968
MS1_T3R8_K4me1	TKQTAR	382.2286++	H3_3-8	Ref2007_AS_10_181219	1	20.5447	131544200	precursor [M+2]	2057255296
MS1_T3R8_K4me1	TKQTAR	382.2286++	H3_3-8	Ref2007_AS_11_181219	1	20.3638	76846690	precursor [M+2]	1202801280
MS1_T3R8_K4me1	TKQTAR	382.2286++	H3_3-8	Ref2007_AS_12_181219	1	20.6051	106752500	precursor [M+2]	1698234496
MS1_T3R8_K4me1	TKQTAR	382.2286++	H3_3-8	Ref2007_AS_13_181219	1	20.4644	99227820	precursor [M+2]	1586383232
MS1_T3R8_K4me1	TKQTAR	382.2286++	H3_3-8	Ref2007_AS_14_181219	1	20.5045	169913500	precursor [M+2]	2676731648
MS1_T3R8_K4me1	TKQTAR	382.2286++	H3_3-8	Ref2007_AS_15_181219	1	20.5045	142535200	precursor [M+2]	2293193728
MS1_T3R8_K4me1	TKQTAR	382.2286++	H3_3-8	Ref2007_AS_16_181219	1	20.6051	158409300	precursor [M+2]	2463175168
MS1_T3R8_K4me1	TKQTAR	382.2286++	H3_3-8	Ref2007_AS_17_181219	1	20.5649	105300200	precursor [M+2]	1637632256
MS1_T3R8_K4me1	TKQTAR	382.2286++	H3_3-8	Ref2007_AS_18_181219	1	20.5046	81249300	precursor [M+2]	1264539392
MS1_T3R8_K4me1	TKQTAR	382.2286++	H3_3-8	Ref2007_AS_19_181219	1	20.404	67806620	precursor [M+2]	1035332096
MS1_T3R8_K4me1	TKQTAR	382.2286++	H3_3-8	Ref2007_AS_20_181219	1	20.5046	143309100	precursor [M+2]	2289750272
MS1_T3R8_K4me1	TKQTAR	382.2286++	H3_3-8	Ref2007_AS_21_181219	1	20.4242	131101600	precursor [M+2]	1995477632
MS1_T3R8_K4me1	TKQTAR	382.2286++	H3_3-8	Ref2007_AS_22_181219	1	20.5247	69358560	precursor [M+2]	1098873600
MS1_T3R8_K4me1	TKQTAR	382.2286++	H3_3-8	Ref2007_AS_23_181219	1	21.2518	155955000	precursor [M+2]	2448126976
MS1_T3R8_K4me1	TKQTAR	382.2286++	H3_3-8	Ref2007_AS_24_181219	1	20.4844	115707900	precursor [M+2]	1848034688
MS1_T3R8_K4me1	TKQTAR	382.2286++	H3_3-8	Ref2007_AS_25_181219	1	20.6251	101765900	precursor [M+2]	1625401856
MS1_T3R8_K4me1	TKQTAR	382.2286++	H3_3-8	Ref2007_AS_26_181219	1	20.5447	124017700	precursor [M+2]	1963034624
MS1_T3R8_K4me1	TKQTAR	382.2286++	H3_3-8	Ref2007_AS_27_181219	1	20.585	144307800	precursor [M+2]	2260824832
MS1_T3R8_K4me1	TKQTAR	382.2286++	H3_3-8	Ref2007_AS_28_181219	1	20.4041	104922700	precursor [M+2]	1649292032
MS1_T3R8_K4me1	TKQTAR	382.2286++	H3_3-8	Ref2007_AS_29_181219	1	20.384	152419700	precursor [M+2]	2424051712
MS1_T3R8_K4me1	TKQTAR	382.2286++	H3_3-8	Ref2007_AS_30_181219	1	20.5246	142335500	precursor [M+2]	2258464768
MS1_T3R8_K4me1	TKQTAR	382.2286++	H3_3-8	Ref2007_AS_31_181219	1	20.5849	88998260	precursor [M+2]	1395725312
MS1_T3R8_K4me1	TKQTAR	382.2286++	H3_3-8	Ref2007_AS_32_181219	1	20.4844	69770880	precursor [M+2]	1096934016
MS1_T3R8_K4me1	TKQTAR	382.2286++	H3_3-8	Ref2007_AS_33_181219	1	20.6251	88330640	precursor [M+2]	1386101376
MS1_T3R8_K4me1	TKQTAR	382.2286++	H3_3-8	Ref2007_AS_34_181219	1	20.3638	72090260	precursor [M+2]	1140949248
MS1_T3R8_K4me1	TKQTAR	382.2286++	H3_3-8	Ref2007_AS_35_181219	1	20.5246	97033360	precursor [M+2]	1552311808
MS1_T3R8_K4me1	TKQTAR	382.2286++	H3_3-8	Ref2007_AS_QC0_181219	1	20.7256	93427380	precursor [M+2]	1456827904
MS1_T3R8_K4me1	TKQTAR	382.2286++	H3_3-8	Ref2007_AS_QC1_181219	1	20.5447	73208710	precursor [M+2]	1139588992
MS1_T3R8_K4me1	TKQTAR	382.2286++	H3_3-8	Ref2007_AS_QC2_181219	1	20.4241	113893800	precursor [M+2]	1789998976
MS1_T3R8_K4me1	TKQTAR	382.2286++	H3_3-8	Ref2007_AS_QC3_181219	1	20.5045	90749780	precursor [M+2]	1416386176
MS1_T3R8_K4me1	TKQTAR	382.2286++	H3_3-8	Ref2007_AS_QC4_181219	1	20.3437	78740440	precursor [M+2]	1242413056
MS1_T3R8_K4me1	TKQTAR	382.2286++	H3_3-8	Ref2007_AS_QC5_181219	1	20.384	66923730	precursor [M+2]	1053756352
MS1_T3R8_K4me2_do_not_use	TKQTAR	366.7218++	H3_3-8	blank_00	0.666667	49.7444	306907	precursor	583048
MS1_T3R8_K4me2_do_not_use	TKQTAR	366.7218++	H3_3-8	blank_01	0.666667	46.6144	354508	precursor	380071
MS1_T3R8_K4me2_do_not_use	TKQTAR	366.7218++	H3_3-8	Ref2007_AS_01_181219	1	20.0021	785731	precursor	1.03093e+06
MS1_T3R8_K4me2_do_not_use	TKQTAR	366.7218++	H3_3-8	Ref2007_AS_02_181219	1	24.6652	16985200	precursor	24476802
MS1_T3R8_K4me2_do_not_use	TKQTAR	366.7218++	H3_3-8	Ref2007_AS_03_181219	1	31.057	259223700	precursor	388870400
MS1_T3R8_K4me2_do_not_use	TKQTAR	366.7218++	H3_3-8	Ref2007_AS_04_181219	1	33.0068	51857690	precursor	73239632
MS1_T3R8_K4me2_do_not_use	TKQTAR	366.7218++	H3_3-8	Ref2007_AS_05_181219	1	24.7255	16198900	precursor	23114268
MS1_T3R8_K4me2_do_not_use	TKQTAR	366.7218++	H3_3-8	Ref2007_AS_06_181219	1	33.0067	89647660	precursor	125412328
MS1_T3R8_K4me2_do_not_use	TKQTAR	366.7218++	H3_3-8	Ref2007_AS_07_181219	1	24.3034	14406940	precursor	20463402
MS1_T3R8_K4me2_do_not_use	TKQTAR	366.7218++	H3_3-8	Ref2007_AS_08_181219	1	33.9515	464297400	precursor	671370624
MS1_T3R8_K4me2_do_not_use	TKQTAR	366.7218++	H3_3-8	Ref2007_AS_09_181219	1	32.7455	218453000	precursor	319592864
MS1_T3R8_K4me2_do_not_use	TKQTAR	366.7218++	H3_3-8	Ref2007_AS_10_181219	1	32.9665	215621600	precursor	320415872
MS1_T3R8_K4me2_do_not_use	TKQTAR	366.7218++	H3_3-8	Ref2007_AS_11_181219	1	31.7404	183898300	precursor	273824704
MS1_T3R8_K4me2_do_not_use	TKQTAR	366.7218++	H3_3-8	Ref2007_AS_12_181219	1	34.1324	47362350	precursor	70356328
MS1_T3R8_K4me2_do_not_use	TKQTAR	366.7218++	H3_3-8	Ref2007_AS_13_181219	1	24.5447	24464100	precursor	35276468
MS1_T3R8_K4me2_do_not_use	TKQTAR	366.7218++	H3_3-8	Ref2007_AS_14_181219	1	33.4489	135352800	precursor	198289136
MS1_T3R8_K4me2_do_not_use	TKQTAR	366.7218++	H3_3-8	Ref2007_AS_15_181219	1	32.8258	83260990	precursor	116323472
MS1_T3R8_K4me2_do_not_use	TKQTAR	366.7218++	H3_3-8	Ref2007_AS_16_181219	1	25.0271	40418280	precursor	58129956
MS1_T3R8_K4me2_do_not_use	TKQTAR	366.7218++	H3_3-8	Ref2007_AS_17_181219	1	33.5495	41524130	precursor	62713628
MS1_T3R8_K4me2_do_not_use	TKQTAR	366.7218++	H3_3-8	Ref2007_AS_18_181219	1	33.1073	35037920	precursor	51677524
MS1_T3R8_K4me2_do_not_use	TKQTAR	366.7218++	H3_3-8	Ref2007_AS_19_181219	1	24.3436	9734195	precursor	14311260
MS1_T3R8_K4me2_do_not_use	TKQTAR	366.7218++	H3_3-8	Ref2007_AS_20_181219	1	33.7103	325751300	precursor	468554208
MS1_T3R8_K4me2_do_not_use	TKQTAR	366.7218++	H3_3-8	Ref2007_AS_21_181219	1	31.7807	195134300	precursor	290740960
MS1_T3R8_K4me2_do_not_use	TKQTAR	366.7218++	H3_3-8	Ref2007_AS_22_181219	1	22.0724	8119493	precursor	11676015
MS1_T3R8_K4me2_do_not_use	TKQTAR	366.7218++	H3_3-8	Ref2007_AS_23_181219	1	36.3058	213578600	precursor	316289600
MS1_T3R8_K4me2_do_not_use	TKQTAR	366.7218++	H3_3-8	Ref2007_AS_24_181219	1	33.3886	97395900	precursor	140093776
MS1_T3R8_K4me2_do_not_use	TKQTAR	366.7218++	H3_3-8	Ref2007_AS_25_181219	1	25.0069	10583160	precursor	15363362
MS1_T3R8_K4me2_do_not_use	TKQTAR	366.7218++	H3_3-8	Ref2007_AS_26_181219	1	41.8507	4805856	precursor	701255104
MS1_T3R8_K4me2_do_not_use	TKQTAR	366.7218++	H3_3-8	Ref2007_AS_27_181219	1	24.8462	13832980	precursor	19823668
MS1_T3R8_K4me2_do_not_use	TKQTAR	366.7218++	H3_3-8	Ref2007_AS_28_181219	1	32.5847	23463740	precursor	33578512
MS1_T3R8_K4me2_do_not_use	TKQTAR	366.7218++	H3_3-8	Ref2007_AS_29_181219	1	23.5196	1244721	precursor	111004128
MS1_T3R8_K4me2_do_not_use	TKQTAR	366.7218++	H3_3-8	Ref2007_AS_30_181219	1	33.2881	87158300	precursor	126676728
MS1_T3R8_K4me2_do_not_use	TKQTAR	366.7218++	H3_3-8	Ref2007_AS_31_181219	1	33.5494	27267630	precursor	40858284
MS1_T3R8_K4me2_do_not_use	TKQTAR	366.7218++	H3_3-8	Ref2007_AS_32_181219	1	33.3283	28347780	precursor	42145020
MS1_T3R8_K4me2_do_not_use	TKQTAR	366.7218++	H3_3-8	Ref2007_AS_33_181219	1	20.3236	5092492	precursor	7233684
MS1_T3R8_K4me2_do_not_use	TKQTAR	366.7218++	H3_3-8	Ref2007_AS_34_181219	1	31.5796	145129700	precursor	219192432
MS1_T3R8_K4me2_do_not_use	TKQTAR	366.7218++	H3_3-8	Ref2007_AS_35_181219	1	33.7906	112995400	precursor	163388112
MS1_T3R8_K4me2_do_not_use	TKQTAR	366.7218++	H3_3-8	Ref2007_AS_QC0_181219	1	36.0217	130961600	precursor	188976432
MS1_T3R8_K4me2_do_not_use	TKQTAR	366.7218++	H3_3-8	Ref2007_AS_QC1_181219	1	25.1275	9755172	precursor	14148605
MS1_T3R8_K4me2_do_not_use	TKQTAR	366.7218++	H3_3-8	Ref2007_AS_QC2_181219	1	33.1273	74621660	precursor	109553880
MS1_T3R8_K4me2_do_not_use	TKQTAR	366.7218++	H3_3-8	Ref2007_AS_QC3_181219	1	24.9466	11925370	precursor	17257556
MS1_T3R8_K4me2_do_not_use	TKQTAR	366.7218++	H3_3-8	Ref2007_AS_QC4_181219	1	32.062	99983040	precursor	149271840
MS1_T3R8_K4me2_do_not_use	TKQTAR	366.7218++	H3_3-8	Ref2007_AS_QC5_181219	1	23.7206	44623750	precursor	163906240
MS1_T3R8_K4me2_do_not_use	TKQTAR	366.7218++	H3_3-8	blank_00	0.666667	49.7444	276142	precursor [M+1]	583048
MS1_T3R8_K4me2_do_not_use	TKQTAR	366.7218++	H3_3-8	blank_01	0.666667	46.6144	25563	precursor [M+1]	380071
MS1_T3R8_K4me2_do_not_use	TKQTAR	366.7218++	H3_3-8	Ref2007_AS_01_181219	1	20.0021	201063	precursor [M+1]	1.03093e+06
MS1_T3R8_K4me2_do_not_use	TKQTAR	366.7218++	H3_3-8	Ref2007_AS_02_181219	1	24.6652	6135792	precursor [M+1]	24476802
MS1_T3R8_K4me2_do_not_use	TKQTAR	366.7218++	H3_3-8	Ref2007_AS_03_181219	1	31.057	104384200	precursor [M+1]	388870400
MS1_T3R8_K4me2_do_not_use	TKQTAR	366.7218++	H3_3-8	Ref2007_AS_04_181219	1	33.0068	16517650	precursor [M+1]	73239632
MS1_T3R8_K4me2_do_not_use	TKQTAR	366.7218++	H3_3-8	Ref2007_AS_05_181219	1	24.7255	5697873	precursor [M+1]	23114268
MS1_T3R8_K4me2_do_not_use	TKQTAR	366.7218++	H3_3-8	Ref2007_AS_06_181219	1	33.0067	28479620	precursor [M+1]	125412328
MS1_T3R8_K4me2_do_not_use	TKQTAR	366.7218++	H3_3-8	Ref2007_AS_07_181219	1	24.3034	4791191	precursor [M+1]	20463402
MS1_T3R8_K4me2_do_not_use	TKQTAR	366.7218++	H3_3-8	Ref2007_AS_08_181219	1	33.9515	167095900	precursor [M+1]	671370624
MS1_T3R8_K4me2_do_not_use	TKQTAR	366.7218++	H3_3-8	Ref2007_AS_09_181219	1	32.7455	81814910	precursor [M+1]	319592864
MS1_T3R8_K4me2_do_not_use	TKQTAR	366.7218++	H3_3-8	Ref2007_AS_10_181219	1	32.9665	85750260	precursor [M+1]	320415872
MS1_T3R8_K4me2_do_not_use	TKQTAR	366.7218++	H3_3-8	Ref2007_AS_11_181219	1	31.7404	73083350	precursor [M+1]	273824704
MS1_T3R8_K4me2_do_not_use	TKQTAR	366.7218++	H3_3-8	Ref2007_AS_12_181219	1	34.1324	18835780	precursor [M+1]	70356328
MS1_T3R8_K4me2_do_not_use	TKQTAR	366.7218++	H3_3-8	Ref2007_AS_13_181219	1	24.5447	8821951	precursor [M+1]	35276468
MS1_T3R8_K4me2_do_not_use	TKQTAR	366.7218++	H3_3-8	Ref2007_AS_14_181219	1	33.4489	50996390	precursor [M+1]	198289136
MS1_T3R8_K4me2_do_not_use	TKQTAR	366.7218++	H3_3-8	Ref2007_AS_15_181219	1	32.8258	24738320	precursor [M+1]	116323472
MS1_T3R8_K4me2_do_not_use	TKQTAR	366.7218++	H3_3-8	Ref2007_AS_16_181219	1	25.0271	14132400	precursor [M+1]	58129956
MS1_T3R8_K4me2_do_not_use	TKQTAR	366.7218++	H3_3-8	Ref2007_AS_17_181219	1	33.5495	17839370	precursor [M+1]	62713628
MS1_T3R8_K4me2_do_not_use	TKQTAR	366.7218++	H3_3-8	Ref2007_AS_18_181219	1	33.1073	13207160	precursor [M+1]	51677524
MS1_T3R8_K4me2_do_not_use	TKQTAR	366.7218++	H3_3-8	Ref2007_AS_19_181219	1	24.3436	3788920	precursor [M+1]	14311260
MS1_T3R8_K4me2_do_not_use	TKQTAR	366.7218++	H3_3-8	Ref2007_AS_20_181219	1	33.7103	113719300	precursor [M+1]	468554208
MS1_T3R8_K4me2_do_not_use	TKQTAR	366.7218++	H3_3-8	Ref2007_AS_21_181219	1	31.7807	79222220	precursor [M+1]	290740960
MS1_T3R8_K4me2_do_not_use	TKQTAR	366.7218++	H3_3-8	Ref2007_AS_22_181219	1	22.0724	2226109	precursor [M+1]	11676015
MS1_T3R8_K4me2_do_not_use	TKQTAR	366.7218++	H3_3-8	Ref2007_AS_23_181219	1	36.3058	84388980	precursor [M+1]	316289600
MS1_T3R8_K4me2_do_not_use	TKQTAR	366.7218++	H3_3-8	Ref2007_AS_24_181219	1	33.3886	34629620	precursor [M+1]	140093776
MS1_T3R8_K4me2_do_not_use	TKQTAR	366.7218++	H3_3-8	Ref2007_AS_25_181219	1	25.0069	3946746	precursor [M+1]	15363362
MS1_T3R8_K4me2_do_not_use	TKQTAR	366.7218++	H3_3-8	Ref2007_AS_26_181219	1	41.8507	498809900	precursor [M+1]	701255104
MS1_T3R8_K4me2_do_not_use	TKQTAR	366.7218++	H3_3-8	Ref2007_AS_27_181219	1	24.8462	5024501	precursor [M+1]	19823668
MS1_T3R8_K4me2_do_not_use	TKQTAR	366.7218++	H3_3-8	Ref2007_AS_28_181219	1	32.5847	8397260	precursor [M+1]	33578512
MS1_T3R8_K4me2_do_not_use	TKQTAR	366.7218++	H3_3-8	Ref2007_AS_29_181219	1	23.5196	74421620	precursor [M+1]	111004128
MS1_T3R8_K4me2_do_not_use	TKQTAR	366.7218++	H3_3-8	Ref2007_AS_30_181219	1	33.2881	32119960	precursor [M+1]	126676728
MS1_T3R8_K4me2_do_not_use	TKQTAR	366.7218++	H3_3-8	Ref2007_AS_31_181219	1	33.5494	11167220	precursor [M+1]	40858284
MS1_T3R8_K4me2_do_not_use	TKQTAR	366.7218++	H3_3-8	Ref2007_AS_32_181219	1	33.3283	11731020	precursor [M+1]	42145020
MS1_T3R8_K4me2_do_not_use	TKQTAR	366.7218++	H3_3-8	Ref2007_AS_33_181219	1	20.3236	1647678	precursor [M+1]	7233684
MS1_T3R8_K4me2_do_not_use	TKQTAR	366.7218++	H3_3-8	Ref2007_AS_34_181219	1	31.5796	61061990	precursor [M+1]	219192432
MS1_T3R8_K4me2_do_not_use	TKQTAR	366.7218++	H3_3-8	Ref2007_AS_35_181219	1	33.7906	40471470	precursor [M+1]	163388112
MS1_T3R8_K4me2_do_not_use	TKQTAR	366.7218++	H3_3-8	Ref2007_AS_QC0_181219	1	36.0217	47363350	precursor [M+1]	188976432
MS1_T3R8_K4me2_do_not_use	TKQTAR	366.7218++	H3_3-8	Ref2007_AS_QC1_181219	1	25.1275	3575029	precursor [M+1]	14148605
MS1_T3R8_K4me2_do_not_use	TKQTAR	366.7218++	H3_3-8	Ref2007_AS_QC2_181219	1	33.1273	28009260	precursor [M+1]	109553880
MS1_T3R8_K4me2_do_not_use	TKQTAR	366.7218++	H3_3-8	Ref2007_AS_QC3_181219	1	24.9466	4369646	precursor [M+1]	17257556
MS1_T3R8_K4me2_do_not_use	TKQTAR	366.7218++	H3_3-8	Ref2007_AS_QC4_181219	1	32.062	40863040	precursor [M+1]	149271840
MS1_T3R8_K4me2_do_not_use	TKQTAR	366.7218++	H3_3-8	Ref2007_AS_QC5_181219	1	23.7206	79637110	precursor [M+1]	163906240
MS1_T3R8_K4me2_do_not_use	TKQTAR	366.7218++	H3_3-8	blank_00	0.666667	49.7444	0	precursor [M+2]	583048
MS1_T3R8_K4me2_do_not_use	TKQTAR	366.7218++	H3_3-8	blank_01	0.666667	46.6144	0	precursor [M+2]	380071
MS1_T3R8_K4me2_do_not_use	TKQTAR	366.7218++	H3_3-8	Ref2007_AS_01_181219	1	20.0021	44134	precursor [M+2]	1.03093e+06
MS1_T3R8_K4me2_do_not_use	TKQTAR	366.7218++	H3_3-8	Ref2007_AS_02_181219	1	24.6652	1355806	precursor [M+2]	24476802
MS1_T3R8_K4me2_do_not_use	TKQTAR	366.7218++	H3_3-8	Ref2007_AS_03_181219	1	31.057	25262520	precursor [M+2]	388870400
MS1_T3R8_K4me2_do_not_use	TKQTAR	366.7218++	H3_3-8	Ref2007_AS_04_181219	1	33.0068	4864287	precursor [M+2]	73239632
MS1_T3R8_K4me2_do_not_use	TKQTAR	366.7218++	H3_3-8	Ref2007_AS_05_181219	1	24.7255	1217495	precursor [M+2]	23114268
MS1_T3R8_K4me2_do_not_use	TKQTAR	366.7218++	H3_3-8	Ref2007_AS_06_181219	1	33.0067	7285053	precursor [M+2]	125412328
MS1_T3R8_K4me2_do_not_use	TKQTAR	366.7218++	H3_3-8	Ref2007_AS_07_181219	1	24.3034	1265275	precursor [M+2]	20463402
MS1_T3R8_K4me2_do_not_use	TKQTAR	366.7218++	H3_3-8	Ref2007_AS_08_181219	1	33.9515	39977350	precursor [M+2]	671370624
MS1_T3R8_K4me2_do_not_use	TKQTAR	366.7218++	H3_3-8	Ref2007_AS_09_181219	1	32.7455	19324960	precursor [M+2]	319592864
MS1_T3R8_K4me2_do_not_use	TKQTAR	366.7218++	H3_3-8	Ref2007_AS_10_181219	1	32.9665	19043990	precursor [M+2]	320415872
MS1_T3R8_K4me2_do_not_use	TKQTAR	366.7218++	H3_3-8	Ref2007_AS_11_181219	1	31.7404	16843080	precursor [M+2]	273824704
MS1_T3R8_K4me2_do_not_use	TKQTAR	366.7218++	H3_3-8	Ref2007_AS_12_181219	1	34.1324	4158202	precursor [M+2]	70356328
MS1_T3R8_K4me2_do_not_use	TKQTAR	366.7218++	H3_3-8	Ref2007_AS_13_181219	1	24.5447	1990414	precursor [M+2]	35276468
MS1_T3R8_K4me2_do_not_use	TKQTAR	366.7218++	H3_3-8	Ref2007_AS_14_181219	1	33.4489	11940000	precursor [M+2]	198289136
MS1_T3R8_K4me2_do_not_use	TKQTAR	366.7218++	H3_3-8	Ref2007_AS_15_181219	1	32.8258	8324162	precursor [M+2]	116323472
MS1_T3R8_K4me2_do_not_use	TKQTAR	366.7218++	H3_3-8	Ref2007_AS_16_181219	1	25.0271	3579280	precursor [M+2]	58129956
MS1_T3R8_K4me2_do_not_use	TKQTAR	366.7218++	H3_3-8	Ref2007_AS_17_181219	1	33.5495	3350124	precursor [M+2]	62713628
MS1_T3R8_K4me2_do_not_use	TKQTAR	366.7218++	H3_3-8	Ref2007_AS_18_181219	1	33.1073	3432446	precursor [M+2]	51677524
MS1_T3R8_K4me2_do_not_use	TKQTAR	366.7218++	H3_3-8	Ref2007_AS_19_181219	1	24.3436	788145	precursor [M+2]	14311260
MS1_T3R8_K4me2_do_not_use	TKQTAR	366.7218++	H3_3-8	Ref2007_AS_20_181219	1	33.7103	29083570	precursor [M+2]	468554208
MS1_T3R8_K4me2_do_not_use	TKQTAR	366.7218++	H3_3-8	Ref2007_AS_21_181219	1	31.7807	16384490	precursor [M+2]	290740960
MS1_T3R8_K4me2_do_not_use	TKQTAR	366.7218++	H3_3-8	Ref2007_AS_22_181219	1	22.0724	1330413	precursor [M+2]	11676015
MS1_T3R8_K4me2_do_not_use	TKQTAR	366.7218++	H3_3-8	Ref2007_AS_23_181219	1	36.3058	18322020	precursor [M+2]	316289600
MS1_T3R8_K4me2_do_not_use	TKQTAR	366.7218++	H3_3-8	Ref2007_AS_24_181219	1	33.3886	8068253	precursor [M+2]	140093776
MS1_T3R8_K4me2_do_not_use	TKQTAR	366.7218++	H3_3-8	Ref2007_AS_25_181219	1	25.0069	833460	precursor [M+2]	15363362
MS1_T3R8_K4me2_do_not_use	TKQTAR	366.7218++	H3_3-8	Ref2007_AS_26_181219	1	41.8507	197639400	precursor [M+2]	701255104
MS1_T3R8_K4me2_do_not_use	TKQTAR	366.7218++	H3_3-8	Ref2007_AS_27_181219	1	24.8462	966193	precursor [M+2]	19823668
MS1_T3R8_K4me2_do_not_use	TKQTAR	366.7218++	H3_3-8	Ref2007_AS_28_181219	1	32.5847	1717516	precursor [M+2]	33578512
MS1_T3R8_K4me2_do_not_use	TKQTAR	366.7218++	H3_3-8	Ref2007_AS_29_181219	1	23.5196	35337780	precursor [M+2]	111004128
MS1_T3R8_K4me2_do_not_use	TKQTAR	366.7218++	H3_3-8	Ref2007_AS_30_181219	1	33.2881	7398475	precursor [M+2]	126676728
MS1_T3R8_K4me2_do_not_use	TKQTAR	366.7218++	H3_3-8	Ref2007_AS_31_181219	1	33.5494	2423432	precursor [M+2]	40858284
MS1_T3R8_K4me2_do_not_use	TKQTAR	366.7218++	H3_3-8	Ref2007_AS_32_181219	1	33.3283	2066228	precursor [M+2]	42145020
MS1_T3R8_K4me2_do_not_use	TKQTAR	366.7218++	H3_3-8	Ref2007_AS_33_181219	1	20.3236	493514	precursor [M+2]	7233684
MS1_T3R8_K4me2_do_not_use	TKQTAR	366.7218++	H3_3-8	Ref2007_AS_34_181219	1	31.5796	13000760	precursor [M+2]	219192432
MS1_T3R8_K4me2_do_not_use	TKQTAR	366.7218++	H3_3-8	Ref2007_AS_35_181219	1	33.7906	9921273	precursor [M+2]	163388112
MS1_T3R8_K4me2_do_not_use	TKQTAR	366.7218++	H3_3-8	Ref2007_AS_QC0_181219	1	36.0217	10651490	precursor [M+2]	188976432
MS1_T3R8_K4me2_do_not_use	TKQTAR	366.7218++	H3_3-8	Ref2007_AS_QC1_181219	1	25.1275	818404	precursor [M+2]	14148605
MS1_T3R8_K4me2_do_not_use	TKQTAR	366.7218++	H3_3-8	Ref2007_AS_QC2_181219	1	33.1273	6922949	precursor [M+2]	109553880
MS1_T3R8_K4me2_do_not_use	TKQTAR	366.7218++	H3_3-8	Ref2007_AS_QC3_181219	1	24.9466	962542	precursor [M+2]	17257556
MS1_T3R8_K4me2_do_not_use	TKQTAR	366.7218++	H3_3-8	Ref2007_AS_QC4_181219	1	32.062	8425763	precursor [M+2]	149271840
MS1_T3R8_K4me2_do_not_use	TKQTAR	366.7218++	H3_3-8	Ref2007_AS_QC5_181219	1	23.7206	39645380	precursor [M+2]	163906240
MS1_T3R8_K4me3_do_not_use	TKQTAR	373.7296++	H3_3-8	blank_00	1	45.9317	423595	precursor	547274
MS1_T3R8_K4me3_do_not_use	TKQTAR	373.7296++	H3_3-8	blank_01	0.333333	85.1461	0	precursor	9004792
MS1_T3R8_K4me3_do_not_use	TKQTAR	373.7296++	H3_3-8	Ref2007_AS_01_181219	1	36.4238	41933160	precursor	265351024
MS1_T3R8_K4me3_do_not_use	TKQTAR	373.7296++	H3_3-8	Ref2007_AS_02_181219	1	20.7055	49565040	precursor	73583160
MS1_T3R8_K4me3_do_not_use	TKQTAR	373.7296++	H3_3-8	Ref2007_AS_03_181219	1	20.5045	36813270	precursor	53713828
MS1_T3R8_K4me3_do_not_use	TKQTAR	373.7296++	H3_3-8	Ref2007_AS_04_181219	1	20.6453	49775670	precursor	74028808
MS1_T3R8_K4me3_do_not_use	TKQTAR	373.7296++	H3_3-8	Ref2007_AS_05_181219	1	46.6546	73746090	precursor	112886000
MS1_T3R8_K4me3_do_not_use	TKQTAR	373.7296++	H3_3-8	Ref2007_AS_06_181219	1	20.6251	50774780	precursor	75428176
MS1_T3R8_K4me3_do_not_use	TKQTAR	373.7296++	H3_3-8	Ref2007_AS_07_181219	1	20.5648	42814340	precursor	62985556
MS1_T3R8_K4me3_do_not_use	TKQTAR	373.7296++	H3_3-8	Ref2007_AS_08_181219	1	20.7056	63951950	precursor	96220304
MS1_T3R8_K4me3_do_not_use	TKQTAR	373.7296++	H3_3-8	Ref2007_AS_09_181219	1	20.6252	30243680	precursor	45664936
MS1_T3R8_K4me3_do_not_use	TKQTAR	373.7296++	H3_3-8	Ref2007_AS_10_181219	1	20.6854	77007940	precursor	113776280
MS1_T3R8_K4me3_do_not_use	TKQTAR	373.7296++	H3_3-8	Ref2007_AS_11_181219	1	20.5246	35066640	precursor	52357256
MS1_T3R8_K4me3_do_not_use	TKQTAR	373.7296++	H3_3-8	Ref2007_AS_12_181219	1	20.7458	67233020	precursor	101186624
MS1_T3R8_K4me3_do_not_use	TKQTAR	373.7296++	H3_3-8	Ref2007_AS_13_181219	1	20.6051	50239150	precursor	72497152
MS1_T3R8_K4me3_do_not_use	TKQTAR	373.7296++	H3_3-8	Ref2007_AS_14_181219	1	20.6251	71806080	precursor	105868744
MS1_T3R8_K4me3_do_not_use	TKQTAR	373.7296++	H3_3-8	Ref2007_AS_15_181219	1	20.6653	76025400	precursor	113013928
MS1_T3R8_K4me3_do_not_use	TKQTAR	373.7296++	H3_3-8	Ref2007_AS_16_181219	1	20.7659	70840400	precursor	103956968
MS1_T3R8_K4me3_do_not_use	TKQTAR	373.7296++	H3_3-8	Ref2007_AS_17_181219	1	20.6855	62238050	precursor	95649352
MS1_T3R8_K4me3_do_not_use	TKQTAR	373.7296++	H3_3-8	Ref2007_AS_18_181219	1	20.6654	45203160	precursor	69388336
MS1_T3R8_K4me3_do_not_use	TKQTAR	373.7296++	H3_3-8	Ref2007_AS_19_181219	1	20.5648	25616040	precursor	37798484
MS1_T3R8_K4me3_do_not_use	TKQTAR	373.7296++	H3_3-8	Ref2007_AS_20_181219	1	20.6453	51943660	precursor	76690720
MS1_T3R8_K4me3_do_not_use	TKQTAR	373.7296++	H3_3-8	Ref2007_AS_21_181219	1	20.585	39659310	precursor	59416676
MS1_T3R8_K4me3_do_not_use	TKQTAR	373.7296++	H3_3-8	Ref2007_AS_22_181219	1	20.6855	45099220	precursor	69089712
MS1_T3R8_K4me3_do_not_use	TKQTAR	373.7296++	H3_3-8	Ref2007_AS_23_181219	1	21.4255	58157060	precursor	85331384
MS1_T3R8_K4me3_do_not_use	TKQTAR	373.7296++	H3_3-8	Ref2007_AS_24_181219	1	20.6251	74364830	precursor	109819376
MS1_T3R8_K4me3_do_not_use	TKQTAR	373.7296++	H3_3-8	Ref2007_AS_25_181219	1	20.7658	55785860	precursor	84438744
MS1_T3R8_K4me3_do_not_use	TKQTAR	373.7296++	H3_3-8	Ref2007_AS_26_181219	1	20.6653	69546900	precursor	103525288
MS1_T3R8_K4me3_do_not_use	TKQTAR	373.7296++	H3_3-8	Ref2007_AS_27_181219	1	20.7056	69928330	precursor	103584624
MS1_T3R8_K4me3_do_not_use	TKQTAR	373.7296++	H3_3-8	Ref2007_AS_28_181219	1	46.3934	301512200	precursor	460156096
MS1_T3R8_K4me3_do_not_use	TKQTAR	373.7296++	H3_3-8	Ref2007_AS_29_181219	1	20.5046	59122450	precursor	87640840
MS1_T3R8_K4me3_do_not_use	TKQTAR	373.7296++	H3_3-8	Ref2007_AS_30_181219	1	20.6854	60172130	precursor	111593040
MS1_T3R8_K4me3_do_not_use	TKQTAR	373.7296++	H3_3-8	Ref2007_AS_31_181219	1	20.7457	44662380	precursor	69408624
MS1_T3R8_K4me3_do_not_use	TKQTAR	373.7296++	H3_3-8	Ref2007_AS_32_181219	1	20.6452	56663900	precursor	84271752
MS1_T3R8_K4me3_do_not_use	TKQTAR	373.7296++	H3_3-8	Ref2007_AS_33_181219	1	20.7658	49790770	precursor	76529360
MS1_T3R8_K4me3_do_not_use	TKQTAR	373.7296++	H3_3-8	Ref2007_AS_34_181219	1	20.5045	50962160	precursor	75348280
MS1_T3R8_K4me3_do_not_use	TKQTAR	373.7296++	H3_3-8	Ref2007_AS_35_181219	1	20.6653	54325660	precursor	84992544
MS1_T3R8_K4me3_do_not_use	TKQTAR	373.7296++	H3_3-8	Ref2007_AS_QC0_181219	1	20.8462	41133930	precursor	60420644
MS1_T3R8_K4me3_do_not_use	TKQTAR	373.7296++	H3_3-8	Ref2007_AS_QC1_181219	1	20.7055	35793600	precursor	52741896
MS1_T3R8_K4me3_do_not_use	TKQTAR	373.7296++	H3_3-8	Ref2007_AS_QC2_181219	1	20.5447	54926860	precursor	82733136
MS1_T3R8_K4me3_do_not_use	TKQTAR	373.7296++	H3_3-8	Ref2007_AS_QC3_181219	1	20.6452	42242220	precursor	64648088
MS1_T3R8_K4me3_do_not_use	TKQTAR	373.7296++	H3_3-8	Ref2007_AS_QC4_181219	1	20.4643	37348530	precursor	56485136
MS1_T3R8_K4me3_do_not_use	TKQTAR	373.7296++	H3_3-8	Ref2007_AS_QC5_181219	1	13.9922	2589994	precursor	3.5449e+06
MS1_T3R8_K4me3_do_not_use	TKQTAR	373.7296++	H3_3-8	blank_00	1	45.9317	117790	precursor [M+1]	547274
MS1_T3R8_K4me3_do_not_use	TKQTAR	373.7296++	H3_3-8	blank_01	0.333333	85.1461	9004792	precursor [M+1]	9004792
MS1_T3R8_K4me3_do_not_use	TKQTAR	373.7296++	H3_3-8	Ref2007_AS_01_181219	1	36.4238	57158830	precursor [M+1]	265351024
MS1_T3R8_K4me3_do_not_use	TKQTAR	373.7296++	H3_3-8	Ref2007_AS_02_181219	1	20.7055	19832990	precursor [M+1]	73583160
MS1_T3R8_K4me3_do_not_use	TKQTAR	373.7296++	H3_3-8	Ref2007_AS_03_181219	1	20.5045	13606700	precursor [M+1]	53713828
MS1_T3R8_K4me3_do_not_use	TKQTAR	373.7296++	H3_3-8	Ref2007_AS_04_181219	1	20.6453	19768450	precursor [M+1]	74028808
MS1_T3R8_K4me3_do_not_use	TKQTAR	373.7296++	H3_3-8	Ref2007_AS_05_181219	1	46.6546	31690210	precursor [M+1]	112886000
MS1_T3R8_K4me3_do_not_use	TKQTAR	373.7296++	H3_3-8	Ref2007_AS_06_181219	1	20.6251	20257710	precursor [M+1]	75428176
MS1_T3R8_K4me3_do_not_use	TKQTAR	373.7296++	H3_3-8	Ref2007_AS_07_181219	1	20.5648	16341330	precursor [M+1]	62985556
MS1_T3R8_K4me3_do_not_use	TKQTAR	373.7296++	H3_3-8	Ref2007_AS_08_181219	1	20.7056	26633710	precursor [M+1]	96220304
MS1_T3R8_K4me3_do_not_use	TKQTAR	373.7296++	H3_3-8	Ref2007_AS_09_181219	1	20.6252	12845320	precursor [M+1]	45664936
MS1_T3R8_K4me3_do_not_use	TKQTAR	373.7296++	H3_3-8	Ref2007_AS_10_181219	1	20.6854	30512730	precursor [M+1]	113776280
MS1_T3R8_K4me3_do_not_use	TKQTAR	373.7296++	H3_3-8	Ref2007_AS_11_181219	1	20.5246	14248870	precursor [M+1]	52357256
MS1_T3R8_K4me3_do_not_use	TKQTAR	373.7296++	H3_3-8	Ref2007_AS_12_181219	1	20.7458	28224920	precursor [M+1]	101186624
MS1_T3R8_K4me3_do_not_use	TKQTAR	373.7296++	H3_3-8	Ref2007_AS_13_181219	1	20.6051	18455150	precursor [M+1]	72497152
MS1_T3R8_K4me3_do_not_use	TKQTAR	373.7296++	H3_3-8	Ref2007_AS_14_181219	1	20.6251	28226770	precursor [M+1]	105868744
MS1_T3R8_K4me3_do_not_use	TKQTAR	373.7296++	H3_3-8	Ref2007_AS_15_181219	1	20.6653	30524880	precursor [M+1]	113013928
MS1_T3R8_K4me3_do_not_use	TKQTAR	373.7296++	H3_3-8	Ref2007_AS_16_181219	1	20.7659	26998790	precursor [M+1]	103956968
MS1_T3R8_K4me3_do_not_use	TKQTAR	373.7296++	H3_3-8	Ref2007_AS_17_181219	1	20.6855	28105220	precursor [M+1]	95649352
MS1_T3R8_K4me3_do_not_use	TKQTAR	373.7296++	H3_3-8	Ref2007_AS_18_181219	1	20.6654	20432440	precursor [M+1]	69388336
MS1_T3R8_K4me3_do_not_use	TKQTAR	373.7296++	H3_3-8	Ref2007_AS_19_181219	1	20.5648	10028940	precursor [M+1]	37798484
MS1_T3R8_K4me3_do_not_use	TKQTAR	373.7296++	H3_3-8	Ref2007_AS_20_181219	1	20.6453	20660330	precursor [M+1]	76690720
MS1_T3R8_K4me3_do_not_use	TKQTAR	373.7296++	H3_3-8	Ref2007_AS_21_181219	1	20.585	16147140	precursor [M+1]	59416676
MS1_T3R8_K4me3_do_not_use	TKQTAR	373.7296++	H3_3-8	Ref2007_AS_22_181219	1	20.6855	20143820	precursor [M+1]	69089712
MS1_T3R8_K4me3_do_not_use	TKQTAR	373.7296++	H3_3-8	Ref2007_AS_23_181219	1	21.4255	22369630	precursor [M+1]	85331384
MS1_T3R8_K4me3_do_not_use	TKQTAR	373.7296++	H3_3-8	Ref2007_AS_24_181219	1	20.6251	29176500	precursor [M+1]	109819376
MS1_T3R8_K4me3_do_not_use	TKQTAR	373.7296++	H3_3-8	Ref2007_AS_25_181219	1	20.7658	23855830	precursor [M+1]	84438744
MS1_T3R8_K4me3_do_not_use	TKQTAR	373.7296++	H3_3-8	Ref2007_AS_26_181219	1	20.6653	28041110	precursor [M+1]	103525288
MS1_T3R8_K4me3_do_not_use	TKQTAR	373.7296++	H3_3-8	Ref2007_AS_27_181219	1	20.7056	27442180	precursor [M+1]	103584624
MS1_T3R8_K4me3_do_not_use	TKQTAR	373.7296++	H3_3-8	Ref2007_AS_28_181219	1	46.3934	128205500	precursor [M+1]	460156096
MS1_T3R8_K4me3_do_not_use	TKQTAR	373.7296++	H3_3-8	Ref2007_AS_29_181219	1	20.5046	23440340	precursor [M+1]	87640840
MS1_T3R8_K4me3_do_not_use	TKQTAR	373.7296++	H3_3-8	Ref2007_AS_30_181219	1	20.6854	46621150	precursor [M+1]	111593040
MS1_T3R8_K4me3_do_not_use	TKQTAR	373.7296++	H3_3-8	Ref2007_AS_31_181219	1	20.7457	21070870	precursor [M+1]	69408624
MS1_T3R8_K4me3_do_not_use	TKQTAR	373.7296++	H3_3-8	Ref2007_AS_32_181219	1	20.6452	22736140	precursor [M+1]	84271752
MS1_T3R8_K4me3_do_not_use	TKQTAR	373.7296++	H3_3-8	Ref2007_AS_33_181219	1	20.7658	22511320	precursor [M+1]	76529360
MS1_T3R8_K4me3_do_not_use	TKQTAR	373.7296++	H3_3-8	Ref2007_AS_34_181219	1	20.5045	19996360	precursor [M+1]	75348280
MS1_T3R8_K4me3_do_not_use	TKQTAR	373.7296++	H3_3-8	Ref2007_AS_35_181219	1	20.6653	25702870	precursor [M+1]	84992544
MS1_T3R8_K4me3_do_not_use	TKQTAR	373.7296++	H3_3-8	Ref2007_AS_QC0_181219	1	20.8462	15873530	precursor [M+1]	60420644
MS1_T3R8_K4me3_do_not_use	TKQTAR	373.7296++	H3_3-8	Ref2007_AS_QC1_181219	1	20.7055	13848310	precursor [M+1]	52741896
MS1_T3R8_K4me3_do_not_use	TKQTAR	373.7296++	H3_3-8	Ref2007_AS_QC2_181219	1	20.5447	23216450	precursor [M+1]	82733136
MS1_T3R8_K4me3_do_not_use	TKQTAR	373.7296++	H3_3-8	Ref2007_AS_QC3_181219	1	20.6452	19102970	precursor [M+1]	64648088
MS1_T3R8_K4me3_do_not_use	TKQTAR	373.7296++	H3_3-8	Ref2007_AS_QC4_181219	1	20.4643	15978770	precursor [M+1]	56485136
MS1_T3R8_K4me3_do_not_use	TKQTAR	373.7296++	H3_3-8	Ref2007_AS_QC5_181219	1	13.9922	906993	precursor [M+1]	3.5449e+06
MS1_T3R8_K4me3_do_not_use	TKQTAR	373.7296++	H3_3-8	blank_00	1	45.9317	5890	precursor [M+2]	547274
MS1_T3R8_K4me3_do_not_use	TKQTAR	373.7296++	H3_3-8	blank_01	0.333333	85.1461	0	precursor [M+2]	9004792
MS1_T3R8_K4me3_do_not_use	TKQTAR	373.7296++	H3_3-8	Ref2007_AS_01_181219	1	36.4238	166259000	precursor [M+2]	265351024
MS1_T3R8_K4me3_do_not_use	TKQTAR	373.7296++	H3_3-8	Ref2007_AS_02_181219	1	20.7055	4185135	precursor [M+2]	73583160
MS1_T3R8_K4me3_do_not_use	TKQTAR	373.7296++	H3_3-8	Ref2007_AS_03_181219	1	20.5045	3293856	precursor [M+2]	53713828
MS1_T3R8_K4me3_do_not_use	TKQTAR	373.7296++	H3_3-8	Ref2007_AS_04_181219	1	20.6453	4484691	precursor [M+2]	74028808
MS1_T3R8_K4me3_do_not_use	TKQTAR	373.7296++	H3_3-8	Ref2007_AS_05_181219	1	46.6546	7449701	precursor [M+2]	112886000
MS1_T3R8_K4me3_do_not_use	TKQTAR	373.7296++	H3_3-8	Ref2007_AS_06_181219	1	20.6251	4395684	precursor [M+2]	75428176
MS1_T3R8_K4me3_do_not_use	TKQTAR	373.7296++	H3_3-8	Ref2007_AS_07_181219	1	20.5648	3829880	precursor [M+2]	62985556
MS1_T3R8_K4me3_do_not_use	TKQTAR	373.7296++	H3_3-8	Ref2007_AS_08_181219	1	20.7056	5634642	precursor [M+2]	96220304
MS1_T3R8_K4me3_do_not_use	TKQTAR	373.7296++	H3_3-8	Ref2007_AS_09_181219	1	20.6252	2575942	precursor [M+2]	45664936
MS1_T3R8_K4me3_do_not_use	TKQTAR	373.7296++	H3_3-8	Ref2007_AS_10_181219	1	20.6854	6255609	precursor [M+2]	113776280
MS1_T3R8_K4me3_do_not_use	TKQTAR	373.7296++	H3_3-8	Ref2007_AS_11_181219	1	20.5246	3041743	precursor [M+2]	52357256
MS1_T3R8_K4me3_do_not_use	TKQTAR	373.7296++	H3_3-8	Ref2007_AS_12_181219	1	20.7458	5728689	precursor [M+2]	101186624
MS1_T3R8_K4me3_do_not_use	TKQTAR	373.7296++	H3_3-8	Ref2007_AS_13_181219	1	20.6051	3802857	precursor [M+2]	72497152
MS1_T3R8_K4me3_do_not_use	TKQTAR	373.7296++	H3_3-8	Ref2007_AS_14_181219	1	20.6251	5835895	precursor [M+2]	105868744
MS1_T3R8_K4me3_do_not_use	TKQTAR	373.7296++	H3_3-8	Ref2007_AS_15_181219	1	20.6653	6463637	precursor [M+2]	113013928
MS1_T3R8_K4me3_do_not_use	TKQTAR	373.7296++	H3_3-8	Ref2007_AS_16_181219	1	20.7659	6117779	precursor [M+2]	103956968
MS1_T3R8_K4me3_do_not_use	TKQTAR	373.7296++	H3_3-8	Ref2007_AS_17_181219	1	20.6855	5306077	precursor [M+2]	95649352
MS1_T3R8_K4me3_do_not_use	TKQTAR	373.7296++	H3_3-8	Ref2007_AS_18_181219	1	20.6654	3752748	precursor [M+2]	69388336
MS1_T3R8_K4me3_do_not_use	TKQTAR	373.7296++	H3_3-8	Ref2007_AS_19_181219	1	20.5648	2153501	precursor [M+2]	37798484
MS1_T3R8_K4me3_do_not_use	TKQTAR	373.7296++	H3_3-8	Ref2007_AS_20_181219	1	20.6453	4086735	precursor [M+2]	76690720
MS1_T3R8_K4me3_do_not_use	TKQTAR	373.7296++	H3_3-8	Ref2007_AS_21_181219	1	20.585	3610228	precursor [M+2]	59416676
MS1_T3R8_K4me3_do_not_use	TKQTAR	373.7296++	H3_3-8	Ref2007_AS_22_181219	1	20.6855	3846683	precursor [M+2]	69089712
MS1_T3R8_K4me3_do_not_use	TKQTAR	373.7296++	H3_3-8	Ref2007_AS_23_181219	1	21.4255	4804700	precursor [M+2]	85331384
MS1_T3R8_K4me3_do_not_use	TKQTAR	373.7296++	H3_3-8	Ref2007_AS_24_181219	1	20.6251	6278045	precursor [M+2]	109819376
MS1_T3R8_K4me3_do_not_use	TKQTAR	373.7296++	H3_3-8	Ref2007_AS_25_181219	1	20.7658	4797045	precursor [M+2]	84438744
MS1_T3R8_K4me3_do_not_use	TKQTAR	373.7296++	H3_3-8	Ref2007_AS_26_181219	1	20.6653	5937292	precursor [M+2]	103525288
MS1_T3R8_K4me3_do_not_use	TKQTAR	373.7296++	H3_3-8	Ref2007_AS_27_181219	1	20.7056	6214116	precursor [M+2]	103584624
MS1_T3R8_K4me3_do_not_use	TKQTAR	373.7296++	H3_3-8	Ref2007_AS_28_181219	1	46.3934	30438410	precursor [M+2]	460156096
MS1_T3R8_K4me3_do_not_use	TKQTAR	373.7296++	H3_3-8	Ref2007_AS_29_181219	1	20.5046	5078055	precursor [M+2]	87640840
MS1_T3R8_K4me3_do_not_use	TKQTAR	373.7296++	H3_3-8	Ref2007_AS_30_181219	1	20.6854	4799763	precursor [M+2]	111593040
MS1_T3R8_K4me3_do_not_use	TKQTAR	373.7296++	H3_3-8	Ref2007_AS_31_181219	1	20.7457	3675384	precursor [M+2]	69408624
MS1_T3R8_K4me3_do_not_use	TKQTAR	373.7296++	H3_3-8	Ref2007_AS_32_181219	1	20.6452	4871716	precursor [M+2]	84271752
MS1_T3R8_K4me3_do_not_use	TKQTAR	373.7296++	H3_3-8	Ref2007_AS_33_181219	1	20.7658	4227261	precursor [M+2]	76529360
MS1_T3R8_K4me3_do_not_use	TKQTAR	373.7296++	H3_3-8	Ref2007_AS_34_181219	1	20.5045	4389771	precursor [M+2]	75348280
MS1_T3R8_K4me3_do_not_use	TKQTAR	373.7296++	H3_3-8	Ref2007_AS_35_181219	1	20.6653	4964009	precursor [M+2]	84992544
MS1_T3R8_K4me3_do_not_use	TKQTAR	373.7296++	H3_3-8	Ref2007_AS_QC0_181219	1	20.8462	3413179	precursor [M+2]	60420644
MS1_T3R8_K4me3_do_not_use	TKQTAR	373.7296++	H3_3-8	Ref2007_AS_QC1_181219	1	20.7055	3099993	precursor [M+2]	52741896
MS1_T3R8_K4me3_do_not_use	TKQTAR	373.7296++	H3_3-8	Ref2007_AS_QC2_181219	1	20.5447	4589822	precursor [M+2]	82733136
MS1_T3R8_K4me3_do_not_use	TKQTAR	373.7296++	H3_3-8	Ref2007_AS_QC3_181219	1	20.6452	3302902	precursor [M+2]	64648088
MS1_T3R8_K4me3_do_not_use	TKQTAR	373.7296++	H3_3-8	Ref2007_AS_QC4_181219	1	20.4643	3157832	precursor [M+2]	56485136
MS1_T3R8_K4me3_do_not_use	TKQTAR	373.7296++	H3_3-8	Ref2007_AS_QC5_181219	1	13.9922	47909	precursor [M+2]	3.5449e+06
MS1_K9R17_noPTM	KSTGGKAPR	496.2937++	H3_9-17	blank_00	1	46.2956	1603394	precursor	2.68554e+06
MS1_K9R17_noPTM	KSTGGKAPR	496.2937++	H3_9-17	blank_01	1	45.73	1515328	precursor	2.46587e+06
MS1_K9R17_noPTM	KSTGGKAPR	496.2937++	H3_9-17	Ref2007_AS_01_181219	1	26.7155	8469300000	precursor	14043144192
MS1_K9R17_noPTM	KSTGGKAPR	496.2937++	H3_9-17	Ref2007_AS_02_181219	1	26.3335	6132297000	precursor	10171075584
MS1_K9R17_noPTM	KSTGGKAPR	496.2937++	H3_9-17	Ref2007_AS_03_181219	1	25.1275	4890661000	precursor	8113371648
MS1_K9R17_noPTM	KSTGGKAPR	496.2937++	H3_9-17	Ref2007_AS_04_181219	1	26.2934	4626413000	precursor	7678714880
MS1_K9R17_noPTM	KSTGGKAPR	496.2937++	H3_9-17	Ref2007_AS_05_181219	1	26.1928	6220161000	precursor	10326681600
MS1_K9R17_noPTM	KSTGGKAPR	496.2937++	H3_9-17	Ref2007_AS_06_181219	1	25.9315	4553580000	precursor	7537552896
MS1_K9R17_noPTM	KSTGGKAPR	496.2937++	H3_9-17	Ref2007_AS_07_181219	1	25.5496	5148156000	precursor	8513777152
MS1_K9R17_noPTM	KSTGGKAPR	496.2937++	H3_9-17	Ref2007_AS_08_181219	1	26.4944	8997723000	precursor	14923842560
MS1_K9R17_noPTM	KSTGGKAPR	496.2937++	H3_9-17	Ref2007_AS_09_181219	1	25.9115	5456548000	precursor	9037465600
MS1_K9R17_noPTM	KSTGGKAPR	496.2937++	H3_9-17	Ref2007_AS_10_181219	1	26.2933	8328328000	precursor	13808428032
MS1_K9R17_noPTM	KSTGGKAPR	496.2937++	H3_9-17	Ref2007_AS_11_181219	1	25.0672	3872925000	precursor	6424759296
MS1_K9R17_noPTM	KSTGGKAPR	496.2937++	H3_9-17	Ref2007_AS_12_181219	1	26.615	6650203000	precursor	11018219520
MS1_K9R17_noPTM	KSTGGKAPR	496.2937++	H3_9-17	Ref2007_AS_13_181219	1	25.8914	6176093000	precursor	10227786752
MS1_K9R17_noPTM	KSTGGKAPR	496.2937++	H3_9-17	Ref2007_AS_14_181219	1	26.0521	8887784000	precursor	14771858432
MS1_K9R17_noPTM	KSTGGKAPR	496.2937++	H3_9-17	Ref2007_AS_15_181219	1	26.1124	6529127000	precursor	10810399744
MS1_K9R17_noPTM	KSTGGKAPR	496.2937++	H3_9-17	Ref2007_AS_16_181219	1	26.4743	7664069000	precursor	12701441024
MS1_K9R17_noPTM	KSTGGKAPR	496.2937++	H3_9-17	Ref2007_AS_17_181219	1	26.3336	5534687000	precursor	9174277120
MS1_K9R17_noPTM	KSTGGKAPR	496.2937++	H3_9-17	Ref2007_AS_18_181219	1	25.9316	4551147000	precursor	7526448640
MS1_K9R17_noPTM	KSTGGKAPR	496.2937++	H3_9-17	Ref2007_AS_19_181219	1	25.3084	3656113000	precursor	6057871360
MS1_K9R17_noPTM	KSTGGKAPR	496.2937++	H3_9-17	Ref2007_AS_20_181219	1	26.1527	7697029000	precursor	12746599424
MS1_K9R17_noPTM	KSTGGKAPR	496.2937++	H3_9-17	Ref2007_AS_21_181219	1	25.3889	5861247000	precursor	9748647936
MS1_K9R17_noPTM	KSTGGKAPR	496.2937++	H3_9-17	Ref2007_AS_22_181219	1	26.2532	4848275000	precursor	8021140480
MS1_K9R17_noPTM	KSTGGKAPR	496.2937++	H3_9-17	Ref2007_AS_23_181219	1	28.084	7200212000	precursor	11914245120
MS1_K9R17_noPTM	KSTGGKAPR	496.2937++	H3_9-17	Ref2007_AS_24_181219	1	25.9114	10407070000	precursor	17254004736
MS1_K9R17_noPTM	KSTGGKAPR	496.2937++	H3_9-17	Ref2007_AS_25_181219	1	26.5144	8398038000	precursor	13922063360
MS1_K9R17_noPTM	KSTGGKAPR	496.2937++	H3_9-17	Ref2007_AS_26_181219	1	26.2129	9630117000	precursor	15970613248
MS1_K9R17_noPTM	KSTGGKAPR	496.2937++	H3_9-17	Ref2007_AS_27_181219	1	26.1929	12022870000	precursor	19964276736
MS1_K9R17_noPTM	KSTGGKAPR	496.2937++	H3_9-17	Ref2007_AS_28_181219	1	25.4693	7731993000	precursor	12773656576
MS1_K9R17_noPTM	KSTGGKAPR	496.2937++	H3_9-17	Ref2007_AS_29_181219	1	25.1879	12657970000	precursor	21002797056
MS1_K9R17_noPTM	KSTGGKAPR	496.2937++	H3_9-17	Ref2007_AS_30_181219	1	25.7506	11716700000	precursor	19407632384
MS1_K9R17_noPTM	KSTGGKAPR	496.2937++	H3_9-17	Ref2007_AS_31_181219	1	26.2531	8090612000	precursor	13406490624
MS1_K9R17_noPTM	KSTGGKAPR	496.2937++	H3_9-17	Ref2007_AS_32_181219	1	26.032	5502676000	precursor	9119471616
MS1_K9R17_noPTM	KSTGGKAPR	496.2937++	H3_9-17	Ref2007_AS_33_181219	1	26.7757	7645183000	precursor	12655568896
MS1_K9R17_noPTM	KSTGGKAPR	496.2937++	H3_9-17	Ref2007_AS_34_181219	1	25.1074	2722298000	precursor	4555565056
MS1_K9R17_noPTM	KSTGGKAPR	496.2937++	H3_9-17	Ref2007_AS_35_181219	1	26.233	2836127000	precursor	4644654592
MS1_K9R17_noPTM	KSTGGKAPR	496.2937++	H3_9-17	Ref2007_AS_QC0_181219	1	27.5194	5708752000	precursor	9463720960
MS1_K9R17_noPTM	KSTGGKAPR	496.2937++	H3_9-17	Ref2007_AS_QC1_181219	1	26.3938	1788929000	precursor	2990779392
MS1_K9R17_noPTM	KSTGGKAPR	496.2937++	H3_9-17	Ref2007_AS_QC2_181219	1	25.7104	2191711000	precursor	3665755136
MS1_K9R17_noPTM	KSTGGKAPR	496.2937++	H3_9-17	Ref2007_AS_QC3_181219	1	26.434	5340035000	precursor	8848279552
MS1_K9R17_noPTM	KSTGGKAPR	496.2937++	H3_9-17	Ref2007_AS_QC4_181219	1	25.1476	4391848000	precursor	7284644864
MS1_K9R17_noPTM	KSTGGKAPR	496.2937++	H3_9-17	Ref2007_AS_QC5_181219	1	25.7105	1218622000	precursor	1999217920
MS1_K9R17_noPTM	KSTGGKAPR	496.2937++	H3_9-17	blank_00	1	46.2956	884767	precursor [M+1]	2.68554e+06
MS1_K9R17_noPTM	KSTGGKAPR	496.2937++	H3_9-17	blank_01	1	45.73	812600	precursor [M+1]	2.46587e+06
MS1_K9R17_noPTM	KSTGGKAPR	496.2937++	H3_9-17	Ref2007_AS_01_181219	1	26.7155	4226661000	precursor [M+1]	14043144192
MS1_K9R17_noPTM	KSTGGKAPR	496.2937++	H3_9-17	Ref2007_AS_02_181219	1	26.3335	3061340000	precursor [M+1]	10171075584
MS1_K9R17_noPTM	KSTGGKAPR	496.2937++	H3_9-17	Ref2007_AS_03_181219	1	25.1275	2453235000	precursor [M+1]	8113371648
MS1_K9R17_noPTM	KSTGGKAPR	496.2937++	H3_9-17	Ref2007_AS_04_181219	1	26.2934	2321851000	precursor [M+1]	7678714880
MS1_K9R17_noPTM	KSTGGKAPR	496.2937++	H3_9-17	Ref2007_AS_05_181219	1	26.1928	3132585000	precursor [M+1]	10326681600
MS1_K9R17_noPTM	KSTGGKAPR	496.2937++	H3_9-17	Ref2007_AS_06_181219	1	25.9315	2271742000	precursor [M+1]	7537552896
MS1_K9R17_noPTM	KSTGGKAPR	496.2937++	H3_9-17	Ref2007_AS_07_181219	1	25.5496	2565950000	precursor [M+1]	8513777152
MS1_K9R17_noPTM	KSTGGKAPR	496.2937++	H3_9-17	Ref2007_AS_08_181219	1	26.4944	4516316000	precursor [M+1]	14923842560
MS1_K9R17_noPTM	KSTGGKAPR	496.2937++	H3_9-17	Ref2007_AS_09_181219	1	25.9115	2732516000	precursor [M+1]	9037465600
MS1_K9R17_noPTM	KSTGGKAPR	496.2937++	H3_9-17	Ref2007_AS_10_181219	1	26.2933	4167434000	precursor [M+1]	13808428032
MS1_K9R17_noPTM	KSTGGKAPR	496.2937++	H3_9-17	Ref2007_AS_11_181219	1	25.0672	1935228000	precursor [M+1]	6424759296
MS1_K9R17_noPTM	KSTGGKAPR	496.2937++	H3_9-17	Ref2007_AS_12_181219	1	26.615	3316430000	precursor [M+1]	11018219520
MS1_K9R17_noPTM	KSTGGKAPR	496.2937++	H3_9-17	Ref2007_AS_13_181219	1	25.8914	3085022000	precursor [M+1]	10227786752
MS1_K9R17_noPTM	KSTGGKAPR	496.2937++	H3_9-17	Ref2007_AS_14_181219	1	26.0521	4458298000	precursor [M+1]	14771858432
MS1_K9R17_noPTM	KSTGGKAPR	496.2937++	H3_9-17	Ref2007_AS_15_181219	1	26.1124	3265536000	precursor [M+1]	10810399744
MS1_K9R17_noPTM	KSTGGKAPR	496.2937++	H3_9-17	Ref2007_AS_16_181219	1	26.4743	3822288000	precursor [M+1]	12701441024
MS1_K9R17_noPTM	KSTGGKAPR	496.2937++	H3_9-17	Ref2007_AS_17_181219	1	26.3336	2762760000	precursor [M+1]	9174277120
MS1_K9R17_noPTM	KSTGGKAPR	496.2937++	H3_9-17	Ref2007_AS_18_181219	1	25.9316	2254949000	precursor [M+1]	7526448640
MS1_K9R17_noPTM	KSTGGKAPR	496.2937++	H3_9-17	Ref2007_AS_19_181219	1	25.3084	1829660000	precursor [M+1]	6057871360
MS1_K9R17_noPTM	KSTGGKAPR	496.2937++	H3_9-17	Ref2007_AS_20_181219	1	26.1527	3859621000	precursor [M+1]	12746599424
MS1_K9R17_noPTM	KSTGGKAPR	496.2937++	H3_9-17	Ref2007_AS_21_181219	1	25.3889	2958316000	precursor [M+1]	9748647936
MS1_K9R17_noPTM	KSTGGKAPR	496.2937++	H3_9-17	Ref2007_AS_22_181219	1	26.2532	2416870000	precursor [M+1]	8021140480
MS1_K9R17_noPTM	KSTGGKAPR	496.2937++	H3_9-17	Ref2007_AS_23_181219	1	28.084	3576919000	precursor [M+1]	11914245120
MS1_K9R17_noPTM	KSTGGKAPR	496.2937++	H3_9-17	Ref2007_AS_24_181219	1	25.9114	5206051000	precursor [M+1]	17254004736
MS1_K9R17_noPTM	KSTGGKAPR	496.2937++	H3_9-17	Ref2007_AS_25_181219	1	26.5144	4203675000	precursor [M+1]	13922063360
MS1_K9R17_noPTM	KSTGGKAPR	496.2937++	H3_9-17	Ref2007_AS_26_181219	1	26.2129	4807842000	precursor [M+1]	15970613248
MS1_K9R17_noPTM	KSTGGKAPR	496.2937++	H3_9-17	Ref2007_AS_27_181219	1	26.1929	6025869000	precursor [M+1]	19964276736
MS1_K9R17_noPTM	KSTGGKAPR	496.2937++	H3_9-17	Ref2007_AS_28_181219	1	25.4693	3830566000	precursor [M+1]	12773656576
MS1_K9R17_noPTM	KSTGGKAPR	496.2937++	H3_9-17	Ref2007_AS_29_181219	1	25.1879	6335280000	precursor [M+1]	21002797056
MS1_K9R17_noPTM	KSTGGKAPR	496.2937++	H3_9-17	Ref2007_AS_30_181219	1	25.7506	5834879000	precursor [M+1]	19407632384
MS1_K9R17_noPTM	KSTGGKAPR	496.2937++	H3_9-17	Ref2007_AS_31_181219	1	26.2531	4042774000	precursor [M+1]	13406490624
MS1_K9R17_noPTM	KSTGGKAPR	496.2937++	H3_9-17	Ref2007_AS_32_181219	1	26.032	2749763000	precursor [M+1]	9119471616
MS1_K9R17_noPTM	KSTGGKAPR	496.2937++	H3_9-17	Ref2007_AS_33_181219	1	26.7757	3814557000	precursor [M+1]	12655568896
MS1_K9R17_noPTM	KSTGGKAPR	496.2937++	H3_9-17	Ref2007_AS_34_181219	1	25.1074	1390727000	precursor [M+1]	4555565056
MS1_K9R17_noPTM	KSTGGKAPR	496.2937++	H3_9-17	Ref2007_AS_35_181219	1	26.233	1375487000	precursor [M+1]	4644654592
MS1_K9R17_noPTM	KSTGGKAPR	496.2937++	H3_9-17	Ref2007_AS_QC0_181219	1	27.5194	2852096000	precursor [M+1]	9463720960
MS1_K9R17_noPTM	KSTGGKAPR	496.2937++	H3_9-17	Ref2007_AS_QC1_181219	1	26.3938	910459700	precursor [M+1]	2990779392
MS1_K9R17_noPTM	KSTGGKAPR	496.2937++	H3_9-17	Ref2007_AS_QC2_181219	1	25.7104	1117804000	precursor [M+1]	3665755136
MS1_K9R17_noPTM	KSTGGKAPR	496.2937++	H3_9-17	Ref2007_AS_QC3_181219	1	26.434	2661218000	precursor [M+1]	8848279552
MS1_K9R17_noPTM	KSTGGKAPR	496.2937++	H3_9-17	Ref2007_AS_QC4_181219	1	25.1476	2196108000	precursor [M+1]	7284644864
MS1_K9R17_noPTM	KSTGGKAPR	496.2937++	H3_9-17	Ref2007_AS_QC5_181219	1	25.7105	594776500	precursor [M+1]	1999217920
MS1_K9R17_noPTM	KSTGGKAPR	496.2937++	H3_9-17	blank_00	1	46.2956	197384	precursor [M+2]	2.68554e+06
MS1_K9R17_noPTM	KSTGGKAPR	496.2937++	H3_9-17	blank_01	1	45.73	137941	precursor [M+2]	2.46587e+06
MS1_K9R17_noPTM	KSTGGKAPR	496.2937++	H3_9-17	Ref2007_AS_01_181219	1	26.7155	1347182000	precursor [M+2]	14043144192
MS1_K9R17_noPTM	KSTGGKAPR	496.2937++	H3_9-17	Ref2007_AS_02_181219	1	26.3335	977439100	precursor [M+2]	10171075584
MS1_K9R17_noPTM	KSTGGKAPR	496.2937++	H3_9-17	Ref2007_AS_03_181219	1	25.1275	769475500	precursor [M+2]	8113371648
MS1_K9R17_noPTM	KSTGGKAPR	496.2937++	H3_9-17	Ref2007_AS_04_181219	1	26.2934	730450900	precursor [M+2]	7678714880
MS1_K9R17_noPTM	KSTGGKAPR	496.2937++	H3_9-17	Ref2007_AS_05_181219	1	26.1928	973936900	precursor [M+2]	10326681600
MS1_K9R17_noPTM	KSTGGKAPR	496.2937++	H3_9-17	Ref2007_AS_06_181219	1	25.9315	712231200	precursor [M+2]	7537552896
MS1_K9R17_noPTM	KSTGGKAPR	496.2937++	H3_9-17	Ref2007_AS_07_181219	1	25.5496	799671000	precursor [M+2]	8513777152
MS1_K9R17_noPTM	KSTGGKAPR	496.2937++	H3_9-17	Ref2007_AS_08_181219	1	26.4944	1409804000	precursor [M+2]	14923842560
MS1_K9R17_noPTM	KSTGGKAPR	496.2937++	H3_9-17	Ref2007_AS_09_181219	1	25.9115	848401300	precursor [M+2]	9037465600
MS1_K9R17_noPTM	KSTGGKAPR	496.2937++	H3_9-17	Ref2007_AS_10_181219	1	26.2933	1312667000	precursor [M+2]	13808428032
MS1_K9R17_noPTM	KSTGGKAPR	496.2937++	H3_9-17	Ref2007_AS_11_181219	1	25.0672	616606100	precursor [M+2]	6424759296
MS1_K9R17_noPTM	KSTGGKAPR	496.2937++	H3_9-17	Ref2007_AS_12_181219	1	26.615	1051586000	precursor [M+2]	11018219520
MS1_K9R17_noPTM	KSTGGKAPR	496.2937++	H3_9-17	Ref2007_AS_13_181219	1	25.8914	966671800	precursor [M+2]	10227786752
MS1_K9R17_noPTM	KSTGGKAPR	496.2937++	H3_9-17	Ref2007_AS_14_181219	1	26.0521	1425775000	precursor [M+2]	14771858432
MS1_K9R17_noPTM	KSTGGKAPR	496.2937++	H3_9-17	Ref2007_AS_15_181219	1	26.1124	1015736000	precursor [M+2]	10810399744
MS1_K9R17_noPTM	KSTGGKAPR	496.2937++	H3_9-17	Ref2007_AS_16_181219	1	26.4743	1215084000	precursor [M+2]	12701441024
MS1_K9R17_noPTM	KSTGGKAPR	496.2937++	H3_9-17	Ref2007_AS_17_181219	1	26.3336	876829400	precursor [M+2]	9174277120
MS1_K9R17_noPTM	KSTGGKAPR	496.2937++	H3_9-17	Ref2007_AS_18_181219	1	25.9316	720352400	precursor [M+2]	7526448640
MS1_K9R17_noPTM	KSTGGKAPR	496.2937++	H3_9-17	Ref2007_AS_19_181219	1	25.3084	572097900	precursor [M+2]	6057871360
MS1_K9R17_noPTM	KSTGGKAPR	496.2937++	H3_9-17	Ref2007_AS_20_181219	1	26.1527	1189950000	precursor [M+2]	12746599424
MS1_K9R17_noPTM	KSTGGKAPR	496.2937++	H3_9-17	Ref2007_AS_21_181219	1	25.3889	929083900	precursor [M+2]	9748647936
MS1_K9R17_noPTM	KSTGGKAPR	496.2937++	H3_9-17	Ref2007_AS_22_181219	1	26.2532	755995700	precursor [M+2]	8021140480
MS1_K9R17_noPTM	KSTGGKAPR	496.2937++	H3_9-17	Ref2007_AS_23_181219	1	28.084	1137114000	precursor [M+2]	11914245120
MS1_K9R17_noPTM	KSTGGKAPR	496.2937++	H3_9-17	Ref2007_AS_24_181219	1	25.9114	1640879000	precursor [M+2]	17254004736
MS1_K9R17_noPTM	KSTGGKAPR	496.2937++	H3_9-17	Ref2007_AS_25_181219	1	26.5144	1320351000	precursor [M+2]	13922063360
MS1_K9R17_noPTM	KSTGGKAPR	496.2937++	H3_9-17	Ref2007_AS_26_181219	1	26.2129	1532654000	precursor [M+2]	15970613248
MS1_K9R17_noPTM	KSTGGKAPR	496.2937++	H3_9-17	Ref2007_AS_27_181219	1	26.1929	1915539000	precursor [M+2]	19964276736
MS1_K9R17_noPTM	KSTGGKAPR	496.2937++	H3_9-17	Ref2007_AS_28_181219	1	25.4693	1211097000	precursor [M+2]	12773656576
MS1_K9R17_noPTM	KSTGGKAPR	496.2937++	H3_9-17	Ref2007_AS_29_181219	1	25.1879	2009550000	precursor [M+2]	21002797056
MS1_K9R17_noPTM	KSTGGKAPR	496.2937++	H3_9-17	Ref2007_AS_30_181219	1	25.7506	1856052000	precursor [M+2]	19407632384
MS1_K9R17_noPTM	KSTGGKAPR	496.2937++	H3_9-17	Ref2007_AS_31_181219	1	26.2531	1273105000	precursor [M+2]	13406490624
MS1_K9R17_noPTM	KSTGGKAPR	496.2937++	H3_9-17	Ref2007_AS_32_181219	1	26.032	867032200	precursor [M+2]	9119471616
MS1_K9R17_noPTM	KSTGGKAPR	496.2937++	H3_9-17	Ref2007_AS_33_181219	1	26.7757	1195828000	precursor [M+2]	12655568896
MS1_K9R17_noPTM	KSTGGKAPR	496.2937++	H3_9-17	Ref2007_AS_34_181219	1	25.1074	442540500	precursor [M+2]	4555565056
MS1_K9R17_noPTM	KSTGGKAPR	496.2937++	H3_9-17	Ref2007_AS_35_181219	1	26.233	433040300	precursor [M+2]	4644654592
MS1_K9R17_noPTM	KSTGGKAPR	496.2937++	H3_9-17	Ref2007_AS_QC0_181219	1	27.5194	902872800	precursor [M+2]	9463720960
MS1_K9R17_noPTM	KSTGGKAPR	496.2937++	H3_9-17	Ref2007_AS_QC1_181219	1	26.3938	291390600	precursor [M+2]	2990779392
MS1_K9R17_noPTM	KSTGGKAPR	496.2937++	H3_9-17	Ref2007_AS_QC2_181219	1	25.7104	356240100	precursor [M+2]	3665755136
MS1_K9R17_noPTM	KSTGGKAPR	496.2937++	H3_9-17	Ref2007_AS_QC3_181219	1	26.434	847026400	precursor [M+2]	8848279552
MS1_K9R17_noPTM	KSTGGKAPR	496.2937++	H3_9-17	Ref2007_AS_QC4_181219	1	25.1476	696688800	precursor [M+2]	7284644864
MS1_K9R17_noPTM	KSTGGKAPR	496.2937++	H3_9-17	Ref2007_AS_QC5_181219	1	25.7105	185819300	precursor [M+2]	1999217920
MS1_K9R17_1Ac	KSTGGKAPR	495.2882++	H3_9-17	blank_00	0	#N/A	0	precursor [M-1]	0
MS1_K9R17_1Ac	KSTGGKAPR	495.2882++	H3_9-17	blank_01	1	27.1428	537479	precursor [M-1]	679874
MS1_K9R17_1Ac	KSTGGKAPR	495.2882++	H3_9-17	Ref2007_AS_01_181219	1	26.9978	5561544000	precursor [M-1]	9386618880
MS1_K9R17_1Ac	KSTGGKAPR	495.2882++	H3_9-17	Ref2007_AS_02_181219	1	26.7408	3450756000	precursor [M-1]	5853142528
MS1_K9R17_1Ac	KSTGGKAPR	495.2882++	H3_9-17	Ref2007_AS_03_181219	1	25.3294	2902712000	precursor [M-1]	4915555328
MS1_K9R17_1Ac	KSTGGKAPR	495.2882++	H3_9-17	Ref2007_AS_04_181219	1	26.4796	2693592000	precursor [M-1]	4566041088
MS1_K9R17_1Ac	KSTGGKAPR	495.2882++	H3_9-17	Ref2007_AS_05_181219	1	26.58	3459685000	precursor [M-1]	5873606656
MS1_K9R17_1Ac	KSTGGKAPR	495.2882++	H3_9-17	Ref2007_AS_06_181219	1	26.1177	2946076000	precursor [M-1]	4976215040
MS1_K9R17_1Ac	KSTGGKAPR	495.2882++	H3_9-17	Ref2007_AS_07_181219	1	25.7157	2901311000	precursor [M-1]	4907773440
MS1_K9R17_1Ac	KSTGGKAPR	495.2882++	H3_9-17	Ref2007_AS_08_181219	1	26.761	4330542000	precursor [M-1]	7370698752
MS1_K9R17_1Ac	KSTGGKAPR	495.2882++	H3_9-17	Ref2007_AS_09_181219	1	26.0977	2648452000	precursor [M-1]	4518791168
MS1_K9R17_1Ac	KSTGGKAPR	495.2882++	H3_9-17	Ref2007_AS_10_181219	1	26.5398	5088435000	precursor [M-1]	8620791808
MS1_K9R17_1Ac	KSTGGKAPR	495.2882++	H3_9-17	Ref2007_AS_11_181219	1	25.5304	2077650000	precursor [M-1]	3518080768
MS1_K9R17_1Ac	KSTGGKAPR	495.2882++	H3_9-17	Ref2007_AS_12_181219	1	26.8012	4402109000	precursor [M-1]	7433563648
MS1_K9R17_1Ac	KSTGGKAPR	495.2882++	H3_9-17	Ref2007_AS_13_181219	1	26.254	3547477000	precursor [M-1]	6027992064
MS1_K9R17_1Ac	KSTGGKAPR	495.2882++	H3_9-17	Ref2007_AS_14_181219	1	26.3589	5347523000	precursor [M-1]	9032820736
MS1_K9R17_1Ac	KSTGGKAPR	495.2882++	H3_9-17	Ref2007_AS_15_181219	1	26.3991	3997914000	precursor [M-1]	6775584256
MS1_K9R17_1Ac	KSTGGKAPR	495.2882++	H3_9-17	Ref2007_AS_16_181219	1	26.7409	4062831000	precursor [M-1]	6901485568
MS1_K9R17_1Ac	KSTGGKAPR	495.2882++	H3_9-17	Ref2007_AS_17_181219	1	26.5197	3324005000	precursor [M-1]	5634264064
MS1_K9R17_1Ac	KSTGGKAPR	495.2882++	H3_9-17	Ref2007_AS_18_181219	1	26.2742	3310113000	precursor [M-1]	5586225664
MS1_K9R17_1Ac	KSTGGKAPR	495.2882++	H3_9-17	Ref2007_AS_19_181219	1	25.7313	2096622000	precursor [M-1]	3547086080
MS1_K9R17_1Ac	KSTGGKAPR	495.2882++	H3_9-17	Ref2007_AS_20_181219	1	26.4595	4182250000	precursor [M-1]	7109937664
MS1_K9R17_1Ac	KSTGGKAPR	495.2882++	H3_9-17	Ref2007_AS_21_181219	1	25.5751	2849065000	precursor [M-1]	4842681856
MS1_K9R17_1Ac	KSTGGKAPR	495.2882++	H3_9-17	Ref2007_AS_22_181219	1	26.5198	2841165000	precursor [M-1]	4821569536
MS1_K9R17_1Ac	KSTGGKAPR	495.2882++	H3_9-17	Ref2007_AS_23_181219	1	28.263	4415208000	precursor [M-1]	7487925760
MS1_K9R17_1Ac	KSTGGKAPR	495.2882++	H3_9-17	Ref2007_AS_24_181219	1	26.0775	5623085000	precursor [M-1]	9554040832
MS1_K9R17_1Ac	KSTGGKAPR	495.2882++	H3_9-17	Ref2007_AS_25_181219	1	26.9217	4452934000	precursor [M-1]	7544721408
MS1_K9R17_1Ac	KSTGGKAPR	495.2882++	H3_9-17	Ref2007_AS_26_181219	1	26.4795	5058011000	precursor [M-1]	8602019840
MS1_K9R17_1Ac	KSTGGKAPR	495.2882++	H3_9-17	Ref2007_AS_27_181219	1	26.5354	6666314000	precursor [M-1]	11318064128
MS1_K9R17_1Ac	KSTGGKAPR	495.2882++	H3_9-17	Ref2007_AS_28_181219	1	25.6354	4505543000	precursor [M-1]	7632988160
MS1_K9R17_1Ac	KSTGGKAPR	495.2882++	H3_9-17	Ref2007_AS_29_181219	1	25.4545	7414583000	precursor [M-1]	12539344896
MS1_K9R17_1Ac	KSTGGKAPR	495.2882++	H3_9-17	Ref2007_AS_30_181219	1	26.1579	6461810000	precursor [M-1]	10971658240
MS1_K9R17_1Ac	KSTGGKAPR	495.2882++	H3_9-17	Ref2007_AS_31_181219	1	26.4192	4344486000	precursor [M-1]	7390160384
MS1_K9R17_1Ac	KSTGGKAPR	495.2882++	H3_9-17	Ref2007_AS_32_181219	1	26.2584	3311725000	precursor [M-1]	5614931456
MS1_K9R17_1Ac	KSTGGKAPR	495.2882++	H3_9-17	Ref2007_AS_33_181219	1	26.9016	4471545000	precursor [M-1]	7572812288
MS1_K9R17_1Ac	KSTGGKAPR	495.2882++	H3_9-17	Ref2007_AS_34_181219	1	25.4701	3720010000	precursor [M-1]	6291375104
MS1_K9R17_1Ac	KSTGGKAPR	495.2882++	H3_9-17	Ref2007_AS_35_181219	1	26.2383	5046329000	precursor [M-1]	8562675200
MS1_K9R17_1Ac	KSTGGKAPR	495.2882++	H3_9-17	Ref2007_AS_QC0_181219	1	27.6811	3167882000	precursor [M-1]	5358021120
MS1_K9R17_1Ac	KSTGGKAPR	495.2882++	H3_9-17	Ref2007_AS_QC1_181219	1	26.6805	2432849000	precursor [M-1]	4121076992
MS1_K9R17_1Ac	KSTGGKAPR	495.2882++	H3_9-17	Ref2007_AS_QC2_181219	1	25.9368	3501251000	precursor [M-1]	5961086976
MS1_K9R17_1Ac	KSTGGKAPR	495.2882++	H3_9-17	Ref2007_AS_QC3_181219	1	26.7408	3074306000	precursor [M-1]	5211686912
MS1_K9R17_1Ac	KSTGGKAPR	495.2882++	H3_9-17	Ref2007_AS_QC4_181219	1	25.5951	2589379000	precursor [M-1]	4387758592
MS1_K9R17_1Ac	KSTGGKAPR	495.2882++	H3_9-17	Ref2007_AS_QC5_181219	1	25.7717	2216241000	precursor [M-1]	3748593152
MS1_K9R17_1Ac	KSTGGKAPR	495.2882++	H3_9-17	blank_00	0	#N/A	0	precursor	0
MS1_K9R17_1Ac	KSTGGKAPR	495.2882++	H3_9-17	blank_01	1	27.1428	133000	precursor	679874
MS1_K9R17_1Ac	KSTGGKAPR	495.2882++	H3_9-17	Ref2007_AS_01_181219	1	26.9978	2818551000	precursor	9386618880
MS1_K9R17_1Ac	KSTGGKAPR	495.2882++	H3_9-17	Ref2007_AS_02_181219	1	26.7408	1758811000	precursor	5853142528
MS1_K9R17_1Ac	KSTGGKAPR	495.2882++	H3_9-17	Ref2007_AS_03_181219	1	25.3294	1475441000	precursor	4915555328
MS1_K9R17_1Ac	KSTGGKAPR	495.2882++	H3_9-17	Ref2007_AS_04_181219	1	26.4796	1369195000	precursor	4566041088
MS1_K9R17_1Ac	KSTGGKAPR	495.2882++	H3_9-17	Ref2007_AS_05_181219	1	26.58	1758768000	precursor	5873606656
MS1_K9R17_1Ac	KSTGGKAPR	495.2882++	H3_9-17	Ref2007_AS_06_181219	1	26.1177	1494899000	precursor	4976215040
MS1_K9R17_1Ac	KSTGGKAPR	495.2882++	H3_9-17	Ref2007_AS_07_181219	1	25.7157	1472339000	precursor	4907773440
MS1_K9R17_1Ac	KSTGGKAPR	495.2882++	H3_9-17	Ref2007_AS_08_181219	1	26.761	2207553000	precursor	7370698752
MS1_K9R17_1Ac	KSTGGKAPR	495.2882++	H3_9-17	Ref2007_AS_09_181219	1	26.0977	1355701000	precursor	4518791168
MS1_K9R17_1Ac	KSTGGKAPR	495.2882++	H3_9-17	Ref2007_AS_10_181219	1	26.5398	2588275000	precursor	8620791808
MS1_K9R17_1Ac	KSTGGKAPR	495.2882++	H3_9-17	Ref2007_AS_11_181219	1	25.5304	1054455000	precursor	3518080768
MS1_K9R17_1Ac	KSTGGKAPR	495.2882++	H3_9-17	Ref2007_AS_12_181219	1	26.8012	2233758000	precursor	7433563648
MS1_K9R17_1Ac	KSTGGKAPR	495.2882++	H3_9-17	Ref2007_AS_13_181219	1	26.254	1819352000	precursor	6027992064
MS1_K9R17_1Ac	KSTGGKAPR	495.2882++	H3_9-17	Ref2007_AS_14_181219	1	26.3589	2704442000	precursor	9032820736
MS1_K9R17_1Ac	KSTGGKAPR	495.2882++	H3_9-17	Ref2007_AS_15_181219	1	26.3991	2037015000	precursor	6775584256
MS1_K9R17_1Ac	KSTGGKAPR	495.2882++	H3_9-17	Ref2007_AS_16_181219	1	26.7409	2069995000	precursor	6901485568
MS1_K9R17_1Ac	KSTGGKAPR	495.2882++	H3_9-17	Ref2007_AS_17_181219	1	26.5197	1695978000	precursor	5634264064
MS1_K9R17_1Ac	KSTGGKAPR	495.2882++	H3_9-17	Ref2007_AS_18_181219	1	26.2742	1683081000	precursor	5586225664
MS1_K9R17_1Ac	KSTGGKAPR	495.2882++	H3_9-17	Ref2007_AS_19_181219	1	25.7313	1060800000	precursor	3547086080
MS1_K9R17_1Ac	KSTGGKAPR	495.2882++	H3_9-17	Ref2007_AS_20_181219	1	26.4595	2133285000	precursor	7109937664
MS1_K9R17_1Ac	KSTGGKAPR	495.2882++	H3_9-17	Ref2007_AS_21_181219	1	25.5751	1448350000	precursor	4842681856
MS1_K9R17_1Ac	KSTGGKAPR	495.2882++	H3_9-17	Ref2007_AS_22_181219	1	26.5198	1448655000	precursor	4821569536
MS1_K9R17_1Ac	KSTGGKAPR	495.2882++	H3_9-17	Ref2007_AS_23_181219	1	28.263	2252087000	precursor	7487925760
MS1_K9R17_1Ac	KSTGGKAPR	495.2882++	H3_9-17	Ref2007_AS_24_181219	1	26.0775	2869746000	precursor	9554040832
MS1_K9R17_1Ac	KSTGGKAPR	495.2882++	H3_9-17	Ref2007_AS_25_181219	1	26.9217	2253879000	precursor	7544721408
MS1_K9R17_1Ac	KSTGGKAPR	495.2882++	H3_9-17	Ref2007_AS_26_181219	1	26.4795	2584379000	precursor	8602019840
MS1_K9R17_1Ac	KSTGGKAPR	495.2882++	H3_9-17	Ref2007_AS_27_181219	1	26.5354	3406611000	precursor	11318064128
MS1_K9R17_1Ac	KSTGGKAPR	495.2882++	H3_9-17	Ref2007_AS_28_181219	1	25.6354	2282872000	precursor	7632988160
MS1_K9R17_1Ac	KSTGGKAPR	495.2882++	H3_9-17	Ref2007_AS_29_181219	1	25.4545	3753751000	precursor	12539344896
MS1_K9R17_1Ac	KSTGGKAPR	495.2882++	H3_9-17	Ref2007_AS_30_181219	1	26.1579	3281225000	precursor	10971658240
MS1_K9R17_1Ac	KSTGGKAPR	495.2882++	H3_9-17	Ref2007_AS_31_181219	1	26.4192	2214353000	precursor	7390160384
MS1_K9R17_1Ac	KSTGGKAPR	495.2882++	H3_9-17	Ref2007_AS_32_181219	1	26.2584	1688282000	precursor	5614931456
MS1_K9R17_1Ac	KSTGGKAPR	495.2882++	H3_9-17	Ref2007_AS_33_181219	1	26.9016	2272080000	precursor	7572812288
MS1_K9R17_1Ac	KSTGGKAPR	495.2882++	H3_9-17	Ref2007_AS_34_181219	1	25.4701	1887794000	precursor	6291375104
MS1_K9R17_1Ac	KSTGGKAPR	495.2882++	H3_9-17	Ref2007_AS_35_181219	1	26.2383	2571200000	precursor	8562675200
MS1_K9R17_1Ac	KSTGGKAPR	495.2882++	H3_9-17	Ref2007_AS_QC0_181219	1	27.6811	1598828000	precursor	5358021120
MS1_K9R17_1Ac	KSTGGKAPR	495.2882++	H3_9-17	Ref2007_AS_QC1_181219	1	26.6805	1242419000	precursor	4121076992
MS1_K9R17_1Ac	KSTGGKAPR	495.2882++	H3_9-17	Ref2007_AS_QC2_181219	1	25.9368	1796918000	precursor	5961086976
MS1_K9R17_1Ac	KSTGGKAPR	495.2882++	H3_9-17	Ref2007_AS_QC3_181219	1	26.7408	1565663000	precursor	5211686912
MS1_K9R17_1Ac	KSTGGKAPR	495.2882++	H3_9-17	Ref2007_AS_QC4_181219	1	25.5951	1318027000	precursor	4387758592
MS1_K9R17_1Ac	KSTGGKAPR	495.2882++	H3_9-17	Ref2007_AS_QC5_181219	1	25.7717	1123524000	precursor	3748593152
MS1_K9R17_1Ac	KSTGGKAPR	495.2882++	H3_9-17	blank_00	0	#N/A	0	precursor [M+1]	0
MS1_K9R17_1Ac	KSTGGKAPR	495.2882++	H3_9-17	blank_01	1	27.1428	9396	precursor [M+1]	679874
MS1_K9R17_1Ac	KSTGGKAPR	495.2882++	H3_9-17	Ref2007_AS_01_181219	1	26.9978	1006525000	precursor [M+1]	9386618880
MS1_K9R17_1Ac	KSTGGKAPR	495.2882++	H3_9-17	Ref2007_AS_02_181219	1	26.7408	643575100	precursor [M+1]	5853142528
MS1_K9R17_1Ac	KSTGGKAPR	495.2882++	H3_9-17	Ref2007_AS_03_181219	1	25.3294	537402600	precursor [M+1]	4915555328
MS1_K9R17_1Ac	KSTGGKAPR	495.2882++	H3_9-17	Ref2007_AS_04_181219	1	26.4796	503253900	precursor [M+1]	4566041088
MS1_K9R17_1Ac	KSTGGKAPR	495.2882++	H3_9-17	Ref2007_AS_05_181219	1	26.58	655154000	precursor [M+1]	5873606656
MS1_K9R17_1Ac	KSTGGKAPR	495.2882++	H3_9-17	Ref2007_AS_06_181219	1	26.1177	535239900	precursor [M+1]	4976215040
MS1_K9R17_1Ac	KSTGGKAPR	495.2882++	H3_9-17	Ref2007_AS_07_181219	1	25.7157	534124000	precursor [M+1]	4907773440
MS1_K9R17_1Ac	KSTGGKAPR	495.2882++	H3_9-17	Ref2007_AS_08_181219	1	26.761	832604100	precursor [M+1]	7370698752
MS1_K9R17_1Ac	KSTGGKAPR	495.2882++	H3_9-17	Ref2007_AS_09_181219	1	26.0977	514637800	precursor [M+1]	4518791168
MS1_K9R17_1Ac	KSTGGKAPR	495.2882++	H3_9-17	Ref2007_AS_10_181219	1	26.5398	944081000	precursor [M+1]	8620791808
MS1_K9R17_1Ac	KSTGGKAPR	495.2882++	H3_9-17	Ref2007_AS_11_181219	1	25.5304	385976400	precursor [M+1]	3518080768
MS1_K9R17_1Ac	KSTGGKAPR	495.2882++	H3_9-17	Ref2007_AS_12_181219	1	26.8012	797695300	precursor [M+1]	7433563648
MS1_K9R17_1Ac	KSTGGKAPR	495.2882++	H3_9-17	Ref2007_AS_13_181219	1	26.254	661163100	precursor [M+1]	6027992064
MS1_K9R17_1Ac	KSTGGKAPR	495.2882++	H3_9-17	Ref2007_AS_14_181219	1	26.3589	980855700	precursor [M+1]	9032820736
MS1_K9R17_1Ac	KSTGGKAPR	495.2882++	H3_9-17	Ref2007_AS_15_181219	1	26.3991	740655600	precursor [M+1]	6775584256
MS1_K9R17_1Ac	KSTGGKAPR	495.2882++	H3_9-17	Ref2007_AS_16_181219	1	26.7409	768660200	precursor [M+1]	6901485568
MS1_K9R17_1Ac	KSTGGKAPR	495.2882++	H3_9-17	Ref2007_AS_17_181219	1	26.5197	614281800	precursor [M+1]	5634264064
MS1_K9R17_1Ac	KSTGGKAPR	495.2882++	H3_9-17	Ref2007_AS_18_181219	1	26.2742	593031500	precursor [M+1]	5586225664
MS1_K9R17_1Ac	KSTGGKAPR	495.2882++	H3_9-17	Ref2007_AS_19_181219	1	25.7313	389663900	precursor [M+1]	3547086080
MS1_K9R17_1Ac	KSTGGKAPR	495.2882++	H3_9-17	Ref2007_AS_20_181219	1	26.4595	794402400	precursor [M+1]	7109937664
MS1_K9R17_1Ac	KSTGGKAPR	495.2882++	H3_9-17	Ref2007_AS_21_181219	1	25.5751	545267200	precursor [M+1]	4842681856
MS1_K9R17_1Ac	KSTGGKAPR	495.2882++	H3_9-17	Ref2007_AS_22_181219	1	26.5198	531749600	precursor [M+1]	4821569536
MS1_K9R17_1Ac	KSTGGKAPR	495.2882++	H3_9-17	Ref2007_AS_23_181219	1	28.263	820629800	precursor [M+1]	7487925760
MS1_K9R17_1Ac	KSTGGKAPR	495.2882++	H3_9-17	Ref2007_AS_24_181219	1	26.0775	1061210000	precursor [M+1]	9554040832
MS1_K9R17_1Ac	KSTGGKAPR	495.2882++	H3_9-17	Ref2007_AS_25_181219	1	26.9217	837908500	precursor [M+1]	7544721408
MS1_K9R17_1Ac	KSTGGKAPR	495.2882++	H3_9-17	Ref2007_AS_26_181219	1	26.4795	959630100	precursor [M+1]	8602019840
MS1_K9R17_1Ac	KSTGGKAPR	495.2882++	H3_9-17	Ref2007_AS_27_181219	1	26.5354	1245139000	precursor [M+1]	11318064128
MS1_K9R17_1Ac	KSTGGKAPR	495.2882++	H3_9-17	Ref2007_AS_28_181219	1	25.6354	844572700	precursor [M+1]	7632988160
MS1_K9R17_1Ac	KSTGGKAPR	495.2882++	H3_9-17	Ref2007_AS_29_181219	1	25.4545	1371011000	precursor [M+1]	12539344896
MS1_K9R17_1Ac	KSTGGKAPR	495.2882++	H3_9-17	Ref2007_AS_30_181219	1	26.1579	1228623000	precursor [M+1]	10971658240
MS1_K9R17_1Ac	KSTGGKAPR	495.2882++	H3_9-17	Ref2007_AS_31_181219	1	26.4192	831320500	precursor [M+1]	7390160384
MS1_K9R17_1Ac	KSTGGKAPR	495.2882++	H3_9-17	Ref2007_AS_32_181219	1	26.2584	614925200	precursor [M+1]	5614931456
MS1_K9R17_1Ac	KSTGGKAPR	495.2882++	H3_9-17	Ref2007_AS_33_181219	1	26.9016	829187500	precursor [M+1]	7572812288
MS1_K9R17_1Ac	KSTGGKAPR	495.2882++	H3_9-17	Ref2007_AS_34_181219	1	25.4701	683570900	precursor [M+1]	6291375104
MS1_K9R17_1Ac	KSTGGKAPR	495.2882++	H3_9-17	Ref2007_AS_35_181219	1	26.2383	945145700	precursor [M+1]	8562675200
MS1_K9R17_1Ac	KSTGGKAPR	495.2882++	H3_9-17	Ref2007_AS_QC0_181219	1	27.6811	591311200	precursor [M+1]	5358021120
MS1_K9R17_1Ac	KSTGGKAPR	495.2882++	H3_9-17	Ref2007_AS_QC1_181219	1	26.6805	445809500	precursor [M+1]	4121076992
MS1_K9R17_1Ac	KSTGGKAPR	495.2882++	H3_9-17	Ref2007_AS_QC2_181219	1	25.9368	662918000	precursor [M+1]	5961086976
MS1_K9R17_1Ac	KSTGGKAPR	495.2882++	H3_9-17	Ref2007_AS_QC3_181219	1	26.7408	571718500	precursor [M+1]	5211686912
MS1_K9R17_1Ac	KSTGGKAPR	495.2882++	H3_9-17	Ref2007_AS_QC4_181219	1	25.5951	480352900	precursor [M+1]	4387758592
MS1_K9R17_1Ac	KSTGGKAPR	495.2882++	H3_9-17	Ref2007_AS_QC5_181219	1	25.7717	408828400	precursor [M+1]	3748593152
MS2_K9R17_y7_K14ac_728	KSTGGKAPR	495.2882++	H3_9-17	blank_00	0.5	54.5549	0	precursor [M-1]	4235.7
MS2_K9R17_y7_K14ac_728	KSTGGKAPR	495.2882++	H3_9-17	blank_01	0.25	20.2284	0	precursor [M-1]	0
MS2_K9R17_y7_K14ac_728	KSTGGKAPR	495.2882++	H3_9-17	Ref2007_AS_01_181219	1	26.9978	5558716000	precursor [M-1]	9383756800
MS2_K9R17_y7_K14ac_728	KSTGGKAPR	495.2882++	H3_9-17	Ref2007_AS_02_181219	1	26.7408	3448342000	precursor [M-1]	5850478592
MS2_K9R17_y7_K14ac_728	KSTGGKAPR	495.2882++	H3_9-17	Ref2007_AS_03_181219	1	25.3294	2894515000	precursor [M-1]	4891929600
MS2_K9R17_y7_K14ac_728	KSTGGKAPR	495.2882++	H3_9-17	Ref2007_AS_04_181219	1	26.4796	2677000000	precursor [M-1]	4529763840
MS2_K9R17_y7_K14ac_728	KSTGGKAPR	495.2882++	H3_9-17	Ref2007_AS_05_181219	1	26.58	3431294000	precursor [M-1]	5811407872
MS2_K9R17_y7_K14ac_728	KSTGGKAPR	495.2882++	H3_9-17	Ref2007_AS_06_181219	1	26.1177	2945313000	precursor [M-1]	4975397376
MS2_K9R17_y7_K14ac_728	KSTGGKAPR	495.2882++	H3_9-17	Ref2007_AS_07_181219	1	25.7157	2889731000	precursor [M-1]	4888178688
MS2_K9R17_y7_K14ac_728	KSTGGKAPR	495.2882++	H3_9-17	Ref2007_AS_08_181219	1	26.761	4329733000	precursor [M-1]	7369690112
MS2_K9R17_y7_K14ac_728	KSTGGKAPR	495.2882++	H3_9-17	Ref2007_AS_09_181219	1	26.0977	2647306000	precursor [M-1]	4517193216
MS2_K9R17_y7_K14ac_728	KSTGGKAPR	495.2882++	H3_9-17	Ref2007_AS_10_181219	1	26.5398	5038607000	precursor [M-1]	8516975616
MS2_K9R17_y7_K14ac_728	KSTGGKAPR	495.2882++	H3_9-17	Ref2007_AS_11_181219	1	25.5304	2077514000	precursor [M-1]	3518042624
MS2_K9R17_y7_K14ac_728	KSTGGKAPR	495.2882++	H3_9-17	Ref2007_AS_12_181219	1	26.8012	4370582000	precursor [M-1]	7371027968
MS2_K9R17_y7_K14ac_728	KSTGGKAPR	495.2882++	H3_9-17	Ref2007_AS_13_181219	1	26.254	3515094000	precursor [M-1]	5962088960
MS2_K9R17_y7_K14ac_728	KSTGGKAPR	495.2882++	H3_9-17	Ref2007_AS_14_181219	1	26.3589	5298620000	precursor [M-1]	8936728576
MS2_K9R17_y7_K14ac_728	KSTGGKAPR	495.2882++	H3_9-17	Ref2007_AS_15_181219	1	26.3991	3996888000	precursor [M-1]	6774517760
MS2_K9R17_y7_K14ac_728	KSTGGKAPR	495.2882++	H3_9-17	Ref2007_AS_16_181219	1	26.7409	4087134000	precursor [M-1]	6931636224
MS2_K9R17_y7_K14ac_728	KSTGGKAPR	495.2882++	H3_9-17	Ref2007_AS_17_181219	1	26.5197	3323121000	precursor [M-1]	5633209344
MS2_K9R17_y7_K14ac_728	KSTGGKAPR	495.2882++	H3_9-17	Ref2007_AS_18_181219	1	26.2742	3308687000	precursor [M-1]	5584014848
MS2_K9R17_y7_K14ac_728	KSTGGKAPR	495.2882++	H3_9-17	Ref2007_AS_19_181219	1	25.7313	2096108000	precursor [M-1]	3546623232
MS2_K9R17_y7_K14ac_728	KSTGGKAPR	495.2882++	H3_9-17	Ref2007_AS_20_181219	1	26.4595	4149896000	precursor [M-1]	7042369024
MS2_K9R17_y7_K14ac_728	KSTGGKAPR	495.2882++	H3_9-17	Ref2007_AS_21_181219	1	25.5751	2822794000	precursor [M-1]	4785369088
MS2_K9R17_y7_K14ac_728	KSTGGKAPR	495.2882++	H3_9-17	Ref2007_AS_22_181219	1	26.5198	2827913000	precursor [M-1]	4790523904
MS2_K9R17_y7_K14ac_728	KSTGGKAPR	495.2882++	H3_9-17	Ref2007_AS_23_181219	1	28.263	4447522000	precursor [M-1]	7539985408
MS2_K9R17_y7_K14ac_728	KSTGGKAPR	495.2882++	H3_9-17	Ref2007_AS_24_181219	1	26.0775	5572663000	precursor [M-1]	9438672896
MS2_K9R17_y7_K14ac_728	KSTGGKAPR	495.2882++	H3_9-17	Ref2007_AS_25_181219	1	26.9217	4416460000	precursor [M-1]	7471808000
MS2_K9R17_y7_K14ac_728	KSTGGKAPR	495.2882++	H3_9-17	Ref2007_AS_26_181219	1	26.4795	5010633000	precursor [M-1]	8500144128
MS2_K9R17_y7_K14ac_728	KSTGGKAPR	495.2882++	H3_9-17	Ref2007_AS_27_181219	1	26.5354	6661695000	precursor [M-1]	11311654912
MS2_K9R17_y7_K14ac_728	KSTGGKAPR	495.2882++	H3_9-17	Ref2007_AS_28_181219	1	25.6354	4502116000	precursor [M-1]	7627148288
MS2_K9R17_y7_K14ac_728	KSTGGKAPR	495.2882++	H3_9-17	Ref2007_AS_29_181219	1	25.4545	7413442000	precursor [M-1]	12533628928
MS2_K9R17_y7_K14ac_728	KSTGGKAPR	495.2882++	H3_9-17	Ref2007_AS_30_181219	1	26.1579	6459360000	precursor [M-1]	10969778176
MS2_K9R17_y7_K14ac_728	KSTGGKAPR	495.2882++	H3_9-17	Ref2007_AS_31_181219	1	26.4192	4321741000	precursor [M-1]	7335502336
MS2_K9R17_y7_K14ac_728	KSTGGKAPR	495.2882++	H3_9-17	Ref2007_AS_32_181219	1	26.2584	3311063000	precursor [M-1]	5614150656
MS2_K9R17_y7_K14ac_728	KSTGGKAPR	495.2882++	H3_9-17	Ref2007_AS_33_181219	1	26.9016	4425674000	precursor [M-1]	7478945280
MS2_K9R17_y7_K14ac_728	KSTGGKAPR	495.2882++	H3_9-17	Ref2007_AS_34_181219	1	25.4701	3707016000	precursor [M-1]	6263916032
MS2_K9R17_y7_K14ac_728	KSTGGKAPR	495.2882++	H3_9-17	Ref2007_AS_35_181219	1	26.2383	5043853000	precursor [M-1]	8559000576
MS2_K9R17_y7_K14ac_728	KSTGGKAPR	495.2882++	H3_9-17	Ref2007_AS_QC0_181219	1	27.6811	3264574000	precursor [M-1]	5532412928
MS2_K9R17_y7_K14ac_728	KSTGGKAPR	495.2882++	H3_9-17	Ref2007_AS_QC1_181219	1	26.6805	2434185000	precursor [M-1]	4122326528
MS2_K9R17_y7_K14ac_728	KSTGGKAPR	495.2882++	H3_9-17	Ref2007_AS_QC2_181219	1	25.9368	3502778000	precursor [M-1]	5962114048
MS2_K9R17_y7_K14ac_728	KSTGGKAPR	495.2882++	H3_9-17	Ref2007_AS_QC3_181219	1	26.7408	3073908000	precursor [M-1]	5211259904
MS2_K9R17_y7_K14ac_728	KSTGGKAPR	495.2882++	H3_9-17	Ref2007_AS_QC4_181219	1	25.5951	2591132000	precursor [M-1]	4389500928
MS2_K9R17_y7_K14ac_728	KSTGGKAPR	495.2882++	H3_9-17	Ref2007_AS_QC5_181219	1	25.7717	2217962000	precursor [M-1]	3750129152
MS2_K9R17_y7_K14ac_728	KSTGGKAPR	495.2882++	H3_9-17	blank_00	0.5	54.5549	4236	precursor	4235.7
MS2_K9R17_y7_K14ac_728	KSTGGKAPR	495.2882++	H3_9-17	blank_01	0.25	20.2284	0	precursor	0
MS2_K9R17_y7_K14ac_728	KSTGGKAPR	495.2882++	H3_9-17	Ref2007_AS_01_181219	1	26.9978	2818516000	precursor	9383756800
MS2_K9R17_y7_K14ac_728	KSTGGKAPR	495.2882++	H3_9-17	Ref2007_AS_02_181219	1	26.7408	1758630000	precursor	5850478592
MS2_K9R17_y7_K14ac_728	KSTGGKAPR	495.2882++	H3_9-17	Ref2007_AS_03_181219	1	25.3294	1464824000	precursor	4891929600
MS2_K9R17_y7_K14ac_728	KSTGGKAPR	495.2882++	H3_9-17	Ref2007_AS_04_181219	1	26.4796	1356110000	precursor	4529763840
MS2_K9R17_y7_K14ac_728	KSTGGKAPR	495.2882++	H3_9-17	Ref2007_AS_05_181219	1	26.58	1736554000	precursor	5811407872
MS2_K9R17_y7_K14ac_728	KSTGGKAPR	495.2882++	H3_9-17	Ref2007_AS_06_181219	1	26.1177	1494845000	precursor	4975397376
MS2_K9R17_y7_K14ac_728	KSTGGKAPR	495.2882++	H3_9-17	Ref2007_AS_07_181219	1	25.7157	1466993000	precursor	4888178688
MS2_K9R17_y7_K14ac_728	KSTGGKAPR	495.2882++	H3_9-17	Ref2007_AS_08_181219	1	26.761	2207367000	precursor	7369690112
MS2_K9R17_y7_K14ac_728	KSTGGKAPR	495.2882++	H3_9-17	Ref2007_AS_09_181219	1	26.0977	1355261000	precursor	4517193216
MS2_K9R17_y7_K14ac_728	KSTGGKAPR	495.2882++	H3_9-17	Ref2007_AS_10_181219	1	26.5398	2551786000	precursor	8516975616
MS2_K9R17_y7_K14ac_728	KSTGGKAPR	495.2882++	H3_9-17	Ref2007_AS_11_181219	1	25.5304	1054520000	precursor	3518042624
MS2_K9R17_y7_K14ac_728	KSTGGKAPR	495.2882++	H3_9-17	Ref2007_AS_12_181219	1	26.8012	2211906000	precursor	7371027968
MS2_K9R17_y7_K14ac_728	KSTGGKAPR	495.2882++	H3_9-17	Ref2007_AS_13_181219	1	26.254	1796379000	precursor	5962088960
MS2_K9R17_y7_K14ac_728	KSTGGKAPR	495.2882++	H3_9-17	Ref2007_AS_14_181219	1	26.3589	2670754000	precursor	8936728576
MS2_K9R17_y7_K14ac_728	KSTGGKAPR	495.2882++	H3_9-17	Ref2007_AS_15_181219	1	26.3991	2036975000	precursor	6774517760
MS2_K9R17_y7_K14ac_728	KSTGGKAPR	495.2882++	H3_9-17	Ref2007_AS_16_181219	1	26.7409	2077842000	precursor	6931636224
MS2_K9R17_y7_K14ac_728	KSTGGKAPR	495.2882++	H3_9-17	Ref2007_AS_17_181219	1	26.5197	1695807000	precursor	5633209344
MS2_K9R17_y7_K14ac_728	KSTGGKAPR	495.2882++	H3_9-17	Ref2007_AS_18_181219	1	26.2742	1682423000	precursor	5584014848
MS2_K9R17_y7_K14ac_728	KSTGGKAPR	495.2882++	H3_9-17	Ref2007_AS_19_181219	1	25.7313	1060851000	precursor	3546623232
MS2_K9R17_y7_K14ac_728	KSTGGKAPR	495.2882++	H3_9-17	Ref2007_AS_20_181219	1	26.4595	2110086000	precursor	7042369024
MS2_K9R17_y7_K14ac_728	KSTGGKAPR	495.2882++	H3_9-17	Ref2007_AS_21_181219	1	25.5751	1427262000	precursor	4785369088
MS2_K9R17_y7_K14ac_728	KSTGGKAPR	495.2882++	H3_9-17	Ref2007_AS_22_181219	1	26.5198	1436396000	precursor	4790523904
MS2_K9R17_y7_K14ac_728	KSTGGKAPR	495.2882++	H3_9-17	Ref2007_AS_23_181219	1	28.263	2267010000	precursor	7539985408
MS2_K9R17_y7_K14ac_728	KSTGGKAPR	495.2882++	H3_9-17	Ref2007_AS_24_181219	1	26.0775	2822997000	precursor	9438672896
MS2_K9R17_y7_K14ac_728	KSTGGKAPR	495.2882++	H3_9-17	Ref2007_AS_25_181219	1	26.9217	2229733000	precursor	7471808000
MS2_K9R17_y7_K14ac_728	KSTGGKAPR	495.2882++	H3_9-17	Ref2007_AS_26_181219	1	26.4795	2547689000	precursor	8500144128
MS2_K9R17_y7_K14ac_728	KSTGGKAPR	495.2882++	H3_9-17	Ref2007_AS_27_181219	1	26.5354	3404958000	precursor	11311654912
MS2_K9R17_y7_K14ac_728	KSTGGKAPR	495.2882++	H3_9-17	Ref2007_AS_28_181219	1	25.6354	2280562000	precursor	7627148288
MS2_K9R17_y7_K14ac_728	KSTGGKAPR	495.2882++	H3_9-17	Ref2007_AS_29_181219	1	25.4545	3749230000	precursor	12533628928
MS2_K9R17_y7_K14ac_728	KSTGGKAPR	495.2882++	H3_9-17	Ref2007_AS_30_181219	1	26.1579	3282018000	precursor	10969778176
MS2_K9R17_y7_K14ac_728	KSTGGKAPR	495.2882++	H3_9-17	Ref2007_AS_31_181219	1	26.4192	2193277000	precursor	7335502336
MS2_K9R17_y7_K14ac_728	KSTGGKAPR	495.2882++	H3_9-17	Ref2007_AS_32_181219	1	26.2584	1688132000	precursor	5614150656
MS2_K9R17_y7_K14ac_728	KSTGGKAPR	495.2882++	H3_9-17	Ref2007_AS_33_181219	1	26.9016	2239521000	precursor	7478945280
MS2_K9R17_y7_K14ac_728	KSTGGKAPR	495.2882++	H3_9-17	Ref2007_AS_34_181219	1	25.4701	1878141000	precursor	6263916032
MS2_K9R17_y7_K14ac_728	KSTGGKAPR	495.2882++	H3_9-17	Ref2007_AS_35_181219	1	26.2383	2570147000	precursor	8559000576
MS2_K9R17_y7_K14ac_728	KSTGGKAPR	495.2882++	H3_9-17	Ref2007_AS_QC0_181219	1	27.6811	1657963000	precursor	5532412928
MS2_K9R17_y7_K14ac_728	KSTGGKAPR	495.2882++	H3_9-17	Ref2007_AS_QC1_181219	1	26.6805	1242365000	precursor	4122326528
MS2_K9R17_y7_K14ac_728	KSTGGKAPR	495.2882++	H3_9-17	Ref2007_AS_QC2_181219	1	25.9368	1796505000	precursor	5962114048
MS2_K9R17_y7_K14ac_728	KSTGGKAPR	495.2882++	H3_9-17	Ref2007_AS_QC3_181219	1	26.7408	1565663000	precursor	5211259904
MS2_K9R17_y7_K14ac_728	KSTGGKAPR	495.2882++	H3_9-17	Ref2007_AS_QC4_181219	1	25.5951	1317979000	precursor	4389500928
MS2_K9R17_y7_K14ac_728	KSTGGKAPR	495.2882++	H3_9-17	Ref2007_AS_QC5_181219	1	25.7717	1123343000	precursor	3750129152
MS2_K9R17_y7_K14ac_728	KSTGGKAPR	495.2882++	H3_9-17	blank_00	0.5	54.5549	0	precursor [M+1]	4235.7
MS2_K9R17_y7_K14ac_728	KSTGGKAPR	495.2882++	H3_9-17	blank_01	0.25	20.2284	0	precursor [M+1]	0
MS2_K9R17_y7_K14ac_728	KSTGGKAPR	495.2882++	H3_9-17	Ref2007_AS_01_181219	1	26.9978	1006525000	precursor [M+1]	9383756800
MS2_K9R17_y7_K14ac_728	KSTGGKAPR	495.2882++	H3_9-17	Ref2007_AS_02_181219	1	26.7408	643506400	precursor [M+1]	5850478592
MS2_K9R17_y7_K14ac_728	KSTGGKAPR	495.2882++	H3_9-17	Ref2007_AS_03_181219	1	25.3294	532590300	precursor [M+1]	4891929600
MS2_K9R17_y7_K14ac_728	KSTGGKAPR	495.2882++	H3_9-17	Ref2007_AS_04_181219	1	26.4796	496653200	precursor [M+1]	4529763840
MS2_K9R17_y7_K14ac_728	KSTGGKAPR	495.2882++	H3_9-17	Ref2007_AS_05_181219	1	26.58	643560200	precursor [M+1]	5811407872
MS2_K9R17_y7_K14ac_728	KSTGGKAPR	495.2882++	H3_9-17	Ref2007_AS_06_181219	1	26.1177	535239900	precursor [M+1]	4975397376
MS2_K9R17_y7_K14ac_728	KSTGGKAPR	495.2882++	H3_9-17	Ref2007_AS_07_181219	1	25.7157	531453900	precursor [M+1]	4888178688
MS2_K9R17_y7_K14ac_728	KSTGGKAPR	495.2882++	H3_9-17	Ref2007_AS_08_181219	1	26.761	832589600	precursor [M+1]	7369690112
MS2_K9R17_y7_K14ac_728	KSTGGKAPR	495.2882++	H3_9-17	Ref2007_AS_09_181219	1	26.0977	514626600	precursor [M+1]	4517193216
MS2_K9R17_y7_K14ac_728	KSTGGKAPR	495.2882++	H3_9-17	Ref2007_AS_10_181219	1	26.5398	926582600	precursor [M+1]	8516975616
MS2_K9R17_y7_K14ac_728	KSTGGKAPR	495.2882++	H3_9-17	Ref2007_AS_11_181219	1	25.5304	386008600	precursor [M+1]	3518042624
MS2_K9R17_y7_K14ac_728	KSTGGKAPR	495.2882++	H3_9-17	Ref2007_AS_12_181219	1	26.8012	788539900	precursor [M+1]	7371027968
MS2_K9R17_y7_K14ac_728	KSTGGKAPR	495.2882++	H3_9-17	Ref2007_AS_13_181219	1	26.254	650616300	precursor [M+1]	5962088960
MS2_K9R17_y7_K14ac_728	KSTGGKAPR	495.2882++	H3_9-17	Ref2007_AS_14_181219	1	26.3589	967354300	precursor [M+1]	8936728576
MS2_K9R17_y7_K14ac_728	KSTGGKAPR	495.2882++	H3_9-17	Ref2007_AS_15_181219	1	26.3991	740655600	precursor [M+1]	6774517760
MS2_K9R17_y7_K14ac_728	KSTGGKAPR	495.2882++	H3_9-17	Ref2007_AS_16_181219	1	26.7409	766660200	precursor [M+1]	6931636224
MS2_K9R17_y7_K14ac_728	KSTGGKAPR	495.2882++	H3_9-17	Ref2007_AS_17_181219	1	26.5197	614281800	precursor [M+1]	5633209344
MS2_K9R17_y7_K14ac_728	KSTGGKAPR	495.2882++	H3_9-17	Ref2007_AS_18_181219	1	26.2742	592904600	precursor [M+1]	5584014848
MS2_K9R17_y7_K14ac_728	KSTGGKAPR	495.2882++	H3_9-17	Ref2007_AS_19_181219	1	25.7313	389664700	precursor [M+1]	3546623232
MS2_K9R17_y7_K14ac_728	KSTGGKAPR	495.2882++	H3_9-17	Ref2007_AS_20_181219	1	26.4595	782387900	precursor [M+1]	7042369024
MS2_K9R17_y7_K14ac_728	KSTGGKAPR	495.2882++	H3_9-17	Ref2007_AS_21_181219	1	25.5751	535313500	precursor [M+1]	4785369088
MS2_K9R17_y7_K14ac_728	KSTGGKAPR	495.2882++	H3_9-17	Ref2007_AS_22_181219	1	26.5198	526215700	precursor [M+1]	4790523904
MS2_K9R17_y7_K14ac_728	KSTGGKAPR	495.2882++	H3_9-17	Ref2007_AS_23_181219	1	28.263	825452400	precursor [M+1]	7539985408
MS2_K9R17_y7_K14ac_728	KSTGGKAPR	495.2882++	H3_9-17	Ref2007_AS_24_181219	1	26.0775	1043013000	precursor [M+1]	9438672896
MS2_K9R17_y7_K14ac_728	KSTGGKAPR	495.2882++	H3_9-17	Ref2007_AS_25_181219	1	26.9217	825615000	precursor [M+1]	7471808000
MS2_K9R17_y7_K14ac_728	KSTGGKAPR	495.2882++	H3_9-17	Ref2007_AS_26_181219	1	26.4795	941822100	precursor [M+1]	8500144128
MS2_K9R17_y7_K14ac_728	KSTGGKAPR	495.2882++	H3_9-17	Ref2007_AS_27_181219	1	26.5354	1245002000	precursor [M+1]	11311654912
MS2_K9R17_y7_K14ac_728	KSTGGKAPR	495.2882++	H3_9-17	Ref2007_AS_28_181219	1	25.6354	844471000	precursor [M+1]	7627148288
MS2_K9R17_y7_K14ac_728	KSTGGKAPR	495.2882++	H3_9-17	Ref2007_AS_29_181219	1	25.4545	1370958000	precursor [M+1]	12533628928
MS2_K9R17_y7_K14ac_728	KSTGGKAPR	495.2882++	H3_9-17	Ref2007_AS_30_181219	1	26.1579	1228401000	precursor [M+1]	10969778176
MS2_K9R17_y7_K14ac_728	KSTGGKAPR	495.2882++	H3_9-17	Ref2007_AS_31_181219	1	26.4192	820484200	precursor [M+1]	7335502336
MS2_K9R17_y7_K14ac_728	KSTGGKAPR	495.2882++	H3_9-17	Ref2007_AS_32_181219	1	26.2584	614956000	precursor [M+1]	5614150656
MS2_K9R17_y7_K14ac_728	KSTGGKAPR	495.2882++	H3_9-17	Ref2007_AS_33_181219	1	26.9016	813750500	precursor [M+1]	7478945280
MS2_K9R17_y7_K14ac_728	KSTGGKAPR	495.2882++	H3_9-17	Ref2007_AS_34_181219	1	25.4701	678759300	precursor [M+1]	6263916032
MS2_K9R17_y7_K14ac_728	KSTGGKAPR	495.2882++	H3_9-17	Ref2007_AS_35_181219	1	26.2383	945000900	precursor [M+1]	8559000576
MS2_K9R17_y7_K14ac_728	KSTGGKAPR	495.2882++	H3_9-17	Ref2007_AS_QC0_181219	1	27.6811	609875300	precursor [M+1]	5532412928
MS2_K9R17_y7_K14ac_728	KSTGGKAPR	495.2882++	H3_9-17	Ref2007_AS_QC1_181219	1	26.6805	445777000	precursor [M+1]	4122326528
MS2_K9R17_y7_K14ac_728	KSTGGKAPR	495.2882++	H3_9-17	Ref2007_AS_QC2_181219	1	25.9368	662830200	precursor [M+1]	5962114048
MS2_K9R17_y7_K14ac_728	KSTGGKAPR	495.2882++	H3_9-17	Ref2007_AS_QC3_181219	1	26.7408	571689100	precursor [M+1]	5211259904
MS2_K9R17_y7_K14ac_728	KSTGGKAPR	495.2882++	H3_9-17	Ref2007_AS_QC4_181219	1	25.5951	480390100	precursor [M+1]	4389500928
MS2_K9R17_y7_K14ac_728	KSTGGKAPR	495.2882++	H3_9-17	Ref2007_AS_QC5_181219	1	25.7717	408824400	precursor [M+1]	3750129152
MS2_K9R17_y7_K14ac_728	KSTGGKAPR	495.2882++	H3_9-17	blank_00	0.5	54.5549	16046	y7	4235.7
MS2_K9R17_y7_K14ac_728	KSTGGKAPR	495.2882++	H3_9-17	blank_01	0.25	20.2284	18135	y7	0
MS2_K9R17_y7_K14ac_728	KSTGGKAPR	495.2882++	H3_9-17	Ref2007_AS_01_181219	1	26.9978	467398700	y7	9383756800
MS2_K9R17_y7_K14ac_728	KSTGGKAPR	495.2882++	H3_9-17	Ref2007_AS_02_181219	1	26.7408	300333700	y7	5850478592
MS2_K9R17_y7_K14ac_728	KSTGGKAPR	495.2882++	H3_9-17	Ref2007_AS_03_181219	1	25.3294	244649200	y7	4891929600
MS2_K9R17_y7_K14ac_728	KSTGGKAPR	495.2882++	H3_9-17	Ref2007_AS_04_181219	1	26.4796	226120300	y7	4529763840
MS2_K9R17_y7_K14ac_728	KSTGGKAPR	495.2882++	H3_9-17	Ref2007_AS_05_181219	1	26.58	306940400	y7	5811407872
MS2_K9R17_y7_K14ac_728	KSTGGKAPR	495.2882++	H3_9-17	Ref2007_AS_06_181219	1	26.1177	257704500	y7	4975397376
MS2_K9R17_y7_K14ac_728	KSTGGKAPR	495.2882++	H3_9-17	Ref2007_AS_07_181219	1	25.7157	242778000	y7	4888178688
MS2_K9R17_y7_K14ac_728	KSTGGKAPR	495.2882++	H3_9-17	Ref2007_AS_08_181219	1	26.761	394320200	y7	7369690112
MS2_K9R17_y7_K14ac_728	KSTGGKAPR	495.2882++	H3_9-17	Ref2007_AS_09_181219	1	26.0977	221532200	y7	4517193216
MS2_K9R17_y7_K14ac_728	KSTGGKAPR	495.2882++	H3_9-17	Ref2007_AS_10_181219	1	26.5398	440053400	y7	8516975616
MS2_K9R17_y7_K14ac_728	KSTGGKAPR	495.2882++	H3_9-17	Ref2007_AS_11_181219	1	25.5304	160369400	y7	3518042624
MS2_K9R17_y7_K14ac_728	KSTGGKAPR	495.2882++	H3_9-17	Ref2007_AS_12_181219	1	26.8012	377414600	y7	7371027968
MS2_K9R17_y7_K14ac_728	KSTGGKAPR	495.2882++	H3_9-17	Ref2007_AS_13_181219	1	26.254	295828000	y7	5962088960
MS2_K9R17_y7_K14ac_728	KSTGGKAPR	495.2882++	H3_9-17	Ref2007_AS_14_181219	1	26.3589	467986900	y7	8936728576
MS2_K9R17_y7_K14ac_728	KSTGGKAPR	495.2882++	H3_9-17	Ref2007_AS_15_181219	1	26.3991	356891000	y7	6774517760
MS2_K9R17_y7_K14ac_728	KSTGGKAPR	495.2882++	H3_9-17	Ref2007_AS_16_181219	1	26.7409	348721300	y7	6931636224
MS2_K9R17_y7_K14ac_728	KSTGGKAPR	495.2882++	H3_9-17	Ref2007_AS_17_181219	1	26.5197	282616200	y7	5633209344
MS2_K9R17_y7_K14ac_728	KSTGGKAPR	495.2882++	H3_9-17	Ref2007_AS_18_181219	1	26.2742	275035000	y7	5584014848
MS2_K9R17_y7_K14ac_728	KSTGGKAPR	495.2882++	H3_9-17	Ref2007_AS_19_181219	1	25.7313	170684400	y7	3546623232
MS2_K9R17_y7_K14ac_728	KSTGGKAPR	495.2882++	H3_9-17	Ref2007_AS_20_181219	1	26.4595	364870200	y7	7042369024
MS2_K9R17_y7_K14ac_728	KSTGGKAPR	495.2882++	H3_9-17	Ref2007_AS_21_181219	1	25.5751	236184400	y7	4785369088
MS2_K9R17_y7_K14ac_728	KSTGGKAPR	495.2882++	H3_9-17	Ref2007_AS_22_181219	1	26.5198	242760700	y7	4790523904
MS2_K9R17_y7_K14ac_728	KSTGGKAPR	495.2882++	H3_9-17	Ref2007_AS_23_181219	1	28.263	392475800	y7	7539985408
MS2_K9R17_y7_K14ac_728	KSTGGKAPR	495.2882++	H3_9-17	Ref2007_AS_24_181219	1	26.0775	493749000	y7	9438672896
MS2_K9R17_y7_K14ac_728	KSTGGKAPR	495.2882++	H3_9-17	Ref2007_AS_25_181219	1	26.9217	405842000	y7	7471808000
MS2_K9R17_y7_K14ac_728	KSTGGKAPR	495.2882++	H3_9-17	Ref2007_AS_26_181219	1	26.4795	452343400	y7	8500144128
MS2_K9R17_y7_K14ac_728	KSTGGKAPR	495.2882++	H3_9-17	Ref2007_AS_27_181219	1	26.5354	597286900	y7	11311654912
MS2_K9R17_y7_K14ac_728	KSTGGKAPR	495.2882++	H3_9-17	Ref2007_AS_28_181219	1	25.6354	392578600	y7	7627148288
MS2_K9R17_y7_K14ac_728	KSTGGKAPR	495.2882++	H3_9-17	Ref2007_AS_29_181219	1	25.4545	658203500	y7	12533628928
MS2_K9R17_y7_K14ac_728	KSTGGKAPR	495.2882++	H3_9-17	Ref2007_AS_30_181219	1	26.1579	546435200	y7	10969778176
MS2_K9R17_y7_K14ac_728	KSTGGKAPR	495.2882++	H3_9-17	Ref2007_AS_31_181219	1	26.4192	375570200	y7	7335502336
MS2_K9R17_y7_K14ac_728	KSTGGKAPR	495.2882++	H3_9-17	Ref2007_AS_32_181219	1	26.2584	287284600	y7	5614150656
MS2_K9R17_y7_K14ac_728	KSTGGKAPR	495.2882++	H3_9-17	Ref2007_AS_33_181219	1	26.9016	387470900	y7	7478945280
MS2_K9R17_y7_K14ac_728	KSTGGKAPR	495.2882++	H3_9-17	Ref2007_AS_34_181219	1	25.4701	298875600	y7	6263916032
MS2_K9R17_y7_K14ac_728	KSTGGKAPR	495.2882++	H3_9-17	Ref2007_AS_35_181219	1	26.2383	429460600	y7	8559000576
MS2_K9R17_y7_K14ac_728	KSTGGKAPR	495.2882++	H3_9-17	Ref2007_AS_QC0_181219	1	27.6811	263089200	y7	5532412928
MS2_K9R17_y7_K14ac_728	KSTGGKAPR	495.2882++	H3_9-17	Ref2007_AS_QC1_181219	1	26.6805	204390200	y7	4122326528
MS2_K9R17_y7_K14ac_728	KSTGGKAPR	495.2882++	H3_9-17	Ref2007_AS_QC2_181219	1	25.9368	307782700	y7	5962114048
MS2_K9R17_y7_K14ac_728	KSTGGKAPR	495.2882++	H3_9-17	Ref2007_AS_QC3_181219	1	26.7408	263076300	y7	5211259904
MS2_K9R17_y7_K14ac_728	KSTGGKAPR	495.2882++	H3_9-17	Ref2007_AS_QC4_181219	1	25.5951	208417300	y7	4389500928
MS2_K9R17_y7_K14ac_728	KSTGGKAPR	495.2882++	H3_9-17	Ref2007_AS_QC5_181219	1	25.7717	178658200	y7	3750129152
MS1_K9R17_2Ac	KSTGGKAPR	493.2749++	H3_9-17	blank_00	0.666667	49.7645	110276	precursor	117249
MS1_K9R17_2Ac	KSTGGKAPR	493.2749++	H3_9-17	blank_01	0.666667	53.8504	751680	precursor	792315
MS1_K9R17_2Ac	KSTGGKAPR	493.2749++	H3_9-17	Ref2007_AS_01_181219	1	27.218	247406800	precursor	463211200
MS1_K9R17_2Ac	KSTGGKAPR	493.2749++	H3_9-17	Ref2007_AS_02_181219	1	26.9566	149046300	precursor	281814048
MS1_K9R17_2Ac	KSTGGKAPR	493.2749++	H3_9-17	Ref2007_AS_03_181219	1	25.6099	122288200	precursor	232318368
MS1_K9R17_2Ac	KSTGGKAPR	493.2749++	H3_9-17	Ref2007_AS_04_181219	1	26.6552	106920700	precursor	204599632
MS1_K9R17_2Ac	KSTGGKAPR	493.2749++	H3_9-17	Ref2007_AS_05_181219	1	26.5747	140178200	precursor	265964064
MS1_K9R17_2Ac	KSTGGKAPR	493.2749++	H3_9-17	Ref2007_AS_06_181219	1	26.4742	121775000	precursor	228873040
MS1_K9R17_2Ac	KSTGGKAPR	493.2749++	H3_9-17	Ref2007_AS_07_181219	1	26.1124	62852220	precursor	113834784
MS1_K9R17_2Ac	KSTGGKAPR	493.2749++	H3_9-17	Ref2007_AS_08_181219	1	26.9969	170513500	precursor	324237536
MS1_K9R17_2Ac	KSTGGKAPR	493.2749++	H3_9-17	Ref2007_AS_09_181219	1	26.3738	92983580	precursor	180963792
MS1_K9R17_2Ac	KSTGGKAPR	493.2749++	H3_9-17	Ref2007_AS_10_181219	1	26.8159	218382600	precursor	412693504
MS1_K9R17_2Ac	KSTGGKAPR	493.2749++	H3_9-17	Ref2007_AS_11_181219	1	25.7305	73714220	precursor	144099776
MS1_K9R17_2Ac	KSTGGKAPR	493.2749++	H3_9-17	Ref2007_AS_12_181219	1	27.0773	195671700	precursor	367951712
MS1_K9R17_2Ac	KSTGGKAPR	493.2749++	H3_9-17	Ref2007_AS_13_181219	1	26.3939	156578300	precursor	294219360
MS1_K9R17_2Ac	KSTGGKAPR	493.2749++	H3_9-17	Ref2007_AS_14_181219	1	26.5747	225868200	precursor	426725536
MS1_K9R17_2Ac	KSTGGKAPR	493.2749++	H3_9-17	Ref2007_AS_15_181219	1	26.5948	80509830	precursor	156403968
MS1_K9R17_2Ac	KSTGGKAPR	493.2749++	H3_9-17	Ref2007_AS_16_181219	1	27.1376	204367300	precursor	379238528
MS1_K9R17_2Ac	KSTGGKAPR	493.2749++	H3_9-17	Ref2007_AS_17_181219	1	26.7557	134763800	precursor	259334432
MS1_K9R17_2Ac	KSTGGKAPR	493.2749++	H3_9-17	Ref2007_AS_18_181219	1	26.4542	156751900	precursor	296602304
MS1_K9R17_2Ac	KSTGGKAPR	493.2749++	H3_9-17	Ref2007_AS_19_181219	1	25.9717	95321490	precursor	180986464
MS1_K9R17_2Ac	KSTGGKAPR	493.2749++	H3_9-17	Ref2007_AS_20_181219	1	26.4542	174154300	precursor	328323520
MS1_K9R17_2Ac	KSTGGKAPR	493.2749++	H3_9-17	Ref2007_AS_21_181219	1	25.8512	55272040	precursor	114664856
MS1_K9R17_2Ac	KSTGGKAPR	493.2749++	H3_9-17	Ref2007_AS_22_181219	1	26.7155	127164900	precursor	239949232
MS1_K9R17_2Ac	KSTGGKAPR	493.2749++	H3_9-17	Ref2007_AS_23_181219	1	28.5665	201114500	precursor	375618560
MS1_K9R17_2Ac	KSTGGKAPR	493.2749++	H3_9-17	Ref2007_AS_24_181219	1	26.4742	189626100	precursor	368948480
MS1_K9R17_2Ac	KSTGGKAPR	493.2749++	H3_9-17	Ref2007_AS_25_181219	1	27.1174	158675200	precursor	308578560
MS1_K9R17_2Ac	KSTGGKAPR	493.2749++	H3_9-17	Ref2007_AS_26_181219	1	26.6149	170666100	precursor	334434464
MS1_K9R17_2Ac	KSTGGKAPR	493.2749++	H3_9-17	Ref2007_AS_27_181219	1	26.9165	229650600	precursor	438936832
MS1_K9R17_2Ac	KSTGGKAPR	493.2749++	H3_9-17	Ref2007_AS_28_181219	1	26.012	73299420	precursor	132928928
MS1_K9R17_2Ac	KSTGGKAPR	493.2749++	H3_9-17	Ref2007_AS_29_181219	1	25.8914	83025780	precursor	146729312
MS1_K9R17_2Ac	KSTGGKAPR	493.2749++	H3_9-17	Ref2007_AS_30_181219	1	26.5144	168840200	precursor	316117184
MS1_K9R17_2Ac	KSTGGKAPR	493.2749++	H3_9-17	Ref2007_AS_31_181219	1	26.7556	149003500	precursor	290011616
MS1_K9R17_2Ac	KSTGGKAPR	493.2749++	H3_9-17	Ref2007_AS_32_181219	1	26.4541	121938800	precursor	231337728
MS1_K9R17_2Ac	KSTGGKAPR	493.2749++	H3_9-17	Ref2007_AS_33_181219	1	26.9968	37548980	precursor	84002432
MS1_K9R17_2Ac	KSTGGKAPR	493.2749++	H3_9-17	Ref2007_AS_34_181219	1	25.7908	115119400	precursor	227669520
MS1_K9R17_2Ac	KSTGGKAPR	493.2749++	H3_9-17	Ref2007_AS_35_181219	1	26.5546	82357020	precursor	150206080
MS1_K9R17_2Ac	KSTGGKAPR	493.2749++	H3_9-17	Ref2007_AS_QC0_181219	1	27.9616	127525800	precursor	239341280
MS1_K9R17_2Ac	KSTGGKAPR	493.2749++	H3_9-17	Ref2007_AS_QC1_181219	1	27.0169	91167050	precursor	177340736
MS1_K9R17_2Ac	KSTGGKAPR	493.2749++	H3_9-17	Ref2007_AS_QC2_181219	1	26.2531	131637400	precursor	252476816
MS1_K9R17_2Ac	KSTGGKAPR	493.2749++	H3_9-17	Ref2007_AS_QC3_181219	1	26.9968	119006900	precursor	226085056
MS1_K9R17_2Ac	KSTGGKAPR	493.2749++	H3_9-17	Ref2007_AS_QC4_181219	1	25.7908	97290170	precursor	188859168
MS1_K9R17_2Ac	KSTGGKAPR	493.2749++	H3_9-17	Ref2007_AS_QC5_181219	1	25.9517	86135220	precursor	166083232
MS1_K9R17_2Ac	KSTGGKAPR	493.2749++	H3_9-17	blank_00	0.666667	49.7645	0	precursor [M+1]	117249
MS1_K9R17_2Ac	KSTGGKAPR	493.2749++	H3_9-17	blank_01	0.666667	53.8504	0	precursor [M+1]	792315
MS1_K9R17_2Ac	KSTGGKAPR	493.2749++	H3_9-17	Ref2007_AS_01_181219	1	27.218	125930800	precursor [M+1]	463211200
MS1_K9R17_2Ac	KSTGGKAPR	493.2749++	H3_9-17	Ref2007_AS_02_181219	1	26.9566	76187060	precursor [M+1]	281814048
MS1_K9R17_2Ac	KSTGGKAPR	493.2749++	H3_9-17	Ref2007_AS_03_181219	1	25.6099	63036350	precursor [M+1]	232318368
MS1_K9R17_2Ac	KSTGGKAPR	493.2749++	H3_9-17	Ref2007_AS_04_181219	1	26.6552	54967970	precursor [M+1]	204599632
MS1_K9R17_2Ac	KSTGGKAPR	493.2749++	H3_9-17	Ref2007_AS_05_181219	1	26.5747	70392250	precursor [M+1]	265964064
MS1_K9R17_2Ac	KSTGGKAPR	493.2749++	H3_9-17	Ref2007_AS_06_181219	1	26.4742	61077400	precursor [M+1]	228873040
MS1_K9R17_2Ac	KSTGGKAPR	493.2749++	H3_9-17	Ref2007_AS_07_181219	1	26.1124	31723560	precursor [M+1]	113834784
MS1_K9R17_2Ac	KSTGGKAPR	493.2749++	H3_9-17	Ref2007_AS_08_181219	1	26.9969	86950040	precursor [M+1]	324237536
MS1_K9R17_2Ac	KSTGGKAPR	493.2749++	H3_9-17	Ref2007_AS_09_181219	1	26.3738	47622190	precursor [M+1]	180963792
MS1_K9R17_2Ac	KSTGGKAPR	493.2749++	H3_9-17	Ref2007_AS_10_181219	1	26.8159	111597700	precursor [M+1]	412693504
MS1_K9R17_2Ac	KSTGGKAPR	493.2749++	H3_9-17	Ref2007_AS_11_181219	1	25.7305	38438160	precursor [M+1]	144099776
MS1_K9R17_2Ac	KSTGGKAPR	493.2749++	H3_9-17	Ref2007_AS_12_181219	1	27.0773	100395800	precursor [M+1]	367951712
MS1_K9R17_2Ac	KSTGGKAPR	493.2749++	H3_9-17	Ref2007_AS_13_181219	1	26.3939	80149190	precursor [M+1]	294219360
MS1_K9R17_2Ac	KSTGGKAPR	493.2749++	H3_9-17	Ref2007_AS_14_181219	1	26.5747	115999700	precursor [M+1]	426725536
MS1_K9R17_2Ac	KSTGGKAPR	493.2749++	H3_9-17	Ref2007_AS_15_181219	1	26.5948	41458550	precursor [M+1]	156403968
MS1_K9R17_2Ac	KSTGGKAPR	493.2749++	H3_9-17	Ref2007_AS_16_181219	1	27.1376	104057800	precursor [M+1]	379238528
MS1_K9R17_2Ac	KSTGGKAPR	493.2749++	H3_9-17	Ref2007_AS_17_181219	1	26.7557	69688450	precursor [M+1]	259334432
MS1_K9R17_2Ac	KSTGGKAPR	493.2749++	H3_9-17	Ref2007_AS_18_181219	1	26.4542	82567310	precursor [M+1]	296602304
MS1_K9R17_2Ac	KSTGGKAPR	493.2749++	H3_9-17	Ref2007_AS_19_181219	1	25.9717	49307200	precursor [M+1]	180986464
MS1_K9R17_2Ac	KSTGGKAPR	493.2749++	H3_9-17	Ref2007_AS_20_181219	1	26.4542	88489670	precursor [M+1]	328323520
MS1_K9R17_2Ac	KSTGGKAPR	493.2749++	H3_9-17	Ref2007_AS_21_181219	1	25.8512	30797190	precursor [M+1]	114664856
MS1_K9R17_2Ac	KSTGGKAPR	493.2749++	H3_9-17	Ref2007_AS_22_181219	1	26.7155	66055030	precursor [M+1]	239949232
MS1_K9R17_2Ac	KSTGGKAPR	493.2749++	H3_9-17	Ref2007_AS_23_181219	1	28.5665	100834300	precursor [M+1]	375618560
MS1_K9R17_2Ac	KSTGGKAPR	493.2749++	H3_9-17	Ref2007_AS_24_181219	1	26.4742	95320500	precursor [M+1]	368948480
MS1_K9R17_2Ac	KSTGGKAPR	493.2749++	H3_9-17	Ref2007_AS_25_181219	1	27.1174	82612500	precursor [M+1]	308578560
MS1_K9R17_2Ac	KSTGGKAPR	493.2749++	H3_9-17	Ref2007_AS_26_181219	1	26.6149	87660470	precursor [M+1]	334434464
MS1_K9R17_2Ac	KSTGGKAPR	493.2749++	H3_9-17	Ref2007_AS_27_181219	1	26.9165	116353400	precursor [M+1]	438936832
MS1_K9R17_2Ac	KSTGGKAPR	493.2749++	H3_9-17	Ref2007_AS_28_181219	1	26.012	35750280	precursor [M+1]	132928928
MS1_K9R17_2Ac	KSTGGKAPR	493.2749++	H3_9-17	Ref2007_AS_29_181219	1	25.8914	40230890	precursor [M+1]	146729312
MS1_K9R17_2Ac	KSTGGKAPR	493.2749++	H3_9-17	Ref2007_AS_30_181219	1	26.5144	87378460	precursor [M+1]	316117184
MS1_K9R17_2Ac	KSTGGKAPR	493.2749++	H3_9-17	Ref2007_AS_31_181219	1	26.7556	75658020	precursor [M+1]	290011616
MS1_K9R17_2Ac	KSTGGKAPR	493.2749++	H3_9-17	Ref2007_AS_32_181219	1	26.4541	62270190	precursor [M+1]	231337728
MS1_K9R17_2Ac	KSTGGKAPR	493.2749++	H3_9-17	Ref2007_AS_33_181219	1	26.9968	21739940	precursor [M+1]	84002432
MS1_K9R17_2Ac	KSTGGKAPR	493.2749++	H3_9-17	Ref2007_AS_34_181219	1	25.7908	59373750	precursor [M+1]	227669520
MS1_K9R17_2Ac	KSTGGKAPR	493.2749++	H3_9-17	Ref2007_AS_35_181219	1	26.5546	42972770	precursor [M+1]	150206080
MS1_K9R17_2Ac	KSTGGKAPR	493.2749++	H3_9-17	Ref2007_AS_QC0_181219	1	27.9616	61971190	precursor [M+1]	239341280
MS1_K9R17_2Ac	KSTGGKAPR	493.2749++	H3_9-17	Ref2007_AS_QC1_181219	1	27.0169	47353090	precursor [M+1]	177340736
MS1_K9R17_2Ac	KSTGGKAPR	493.2749++	H3_9-17	Ref2007_AS_QC2_181219	1	26.2531	67809270	precursor [M+1]	252476816
MS1_K9R17_2Ac	KSTGGKAPR	493.2749++	H3_9-17	Ref2007_AS_QC3_181219	1	26.9968	59713680	precursor [M+1]	226085056
MS1_K9R17_2Ac	KSTGGKAPR	493.2749++	H3_9-17	Ref2007_AS_QC4_181219	1	25.7908	50356850	precursor [M+1]	188859168
MS1_K9R17_2Ac	KSTGGKAPR	493.2749++	H3_9-17	Ref2007_AS_QC5_181219	1	25.9517	43081770	precursor [M+1]	166083232
MS1_K9R17_2Ac	KSTGGKAPR	493.2749++	H3_9-17	blank_00	0.666667	49.7645	6972	precursor [M+2]	117249
MS1_K9R17_2Ac	KSTGGKAPR	493.2749++	H3_9-17	blank_01	0.666667	53.8504	40635	precursor [M+2]	792315
MS1_K9R17_2Ac	KSTGGKAPR	493.2749++	H3_9-17	Ref2007_AS_01_181219	1	27.218	89873540	precursor [M+2]	463211200
MS1_K9R17_2Ac	KSTGGKAPR	493.2749++	H3_9-17	Ref2007_AS_02_181219	1	26.9566	56580670	precursor [M+2]	281814048
MS1_K9R17_2Ac	KSTGGKAPR	493.2749++	H3_9-17	Ref2007_AS_03_181219	1	25.6099	46993860	precursor [M+2]	232318368
MS1_K9R17_2Ac	KSTGGKAPR	493.2749++	H3_9-17	Ref2007_AS_04_181219	1	26.6552	42710980	precursor [M+2]	204599632
MS1_K9R17_2Ac	KSTGGKAPR	493.2749++	H3_9-17	Ref2007_AS_05_181219	1	26.5747	55393570	precursor [M+2]	265964064
MS1_K9R17_2Ac	KSTGGKAPR	493.2749++	H3_9-17	Ref2007_AS_06_181219	1	26.4742	46020590	precursor [M+2]	228873040
MS1_K9R17_2Ac	KSTGGKAPR	493.2749++	H3_9-17	Ref2007_AS_07_181219	1	26.1124	19259010	precursor [M+2]	113834784
MS1_K9R17_2Ac	KSTGGKAPR	493.2749++	H3_9-17	Ref2007_AS_08_181219	1	26.9969	66774000	precursor [M+2]	324237536
MS1_K9R17_2Ac	KSTGGKAPR	493.2749++	H3_9-17	Ref2007_AS_09_181219	1	26.3738	40358020	precursor [M+2]	180963792
MS1_K9R17_2Ac	KSTGGKAPR	493.2749++	H3_9-17	Ref2007_AS_10_181219	1	26.8159	82713220	precursor [M+2]	412693504
MS1_K9R17_2Ac	KSTGGKAPR	493.2749++	H3_9-17	Ref2007_AS_11_181219	1	25.7305	31947390	precursor [M+2]	144099776
MS1_K9R17_2Ac	KSTGGKAPR	493.2749++	H3_9-17	Ref2007_AS_12_181219	1	27.0773	71884140	precursor [M+2]	367951712
MS1_K9R17_2Ac	KSTGGKAPR	493.2749++	H3_9-17	Ref2007_AS_13_181219	1	26.3939	57491830	precursor [M+2]	294219360
MS1_K9R17_2Ac	KSTGGKAPR	493.2749++	H3_9-17	Ref2007_AS_14_181219	1	26.5747	84857660	precursor [M+2]	426725536
MS1_K9R17_2Ac	KSTGGKAPR	493.2749++	H3_9-17	Ref2007_AS_15_181219	1	26.5948	34435590	precursor [M+2]	156403968
MS1_K9R17_2Ac	KSTGGKAPR	493.2749++	H3_9-17	Ref2007_AS_16_181219	1	27.1376	70813390	precursor [M+2]	379238528
MS1_K9R17_2Ac	KSTGGKAPR	493.2749++	H3_9-17	Ref2007_AS_17_181219	1	26.7557	54882140	precursor [M+2]	259334432
MS1_K9R17_2Ac	KSTGGKAPR	493.2749++	H3_9-17	Ref2007_AS_18_181219	1	26.4542	57283090	precursor [M+2]	296602304
MS1_K9R17_2Ac	KSTGGKAPR	493.2749++	H3_9-17	Ref2007_AS_19_181219	1	25.9717	36357780	precursor [M+2]	180986464
MS1_K9R17_2Ac	KSTGGKAPR	493.2749++	H3_9-17	Ref2007_AS_20_181219	1	26.4542	65679540	precursor [M+2]	328323520
MS1_K9R17_2Ac	KSTGGKAPR	493.2749++	H3_9-17	Ref2007_AS_21_181219	1	25.8512	28595620	precursor [M+2]	114664856
MS1_K9R17_2Ac	KSTGGKAPR	493.2749++	H3_9-17	Ref2007_AS_22_181219	1	26.7155	46729300	precursor [M+2]	239949232
MS1_K9R17_2Ac	KSTGGKAPR	493.2749++	H3_9-17	Ref2007_AS_23_181219	1	28.5665	73669650	precursor [M+2]	375618560
MS1_K9R17_2Ac	KSTGGKAPR	493.2749++	H3_9-17	Ref2007_AS_24_181219	1	26.4742	84001930	precursor [M+2]	368948480
MS1_K9R17_2Ac	KSTGGKAPR	493.2749++	H3_9-17	Ref2007_AS_25_181219	1	27.1174	67290850	precursor [M+2]	308578560
MS1_K9R17_2Ac	KSTGGKAPR	493.2749++	H3_9-17	Ref2007_AS_26_181219	1	26.6149	76107850	precursor [M+2]	334434464
MS1_K9R17_2Ac	KSTGGKAPR	493.2749++	H3_9-17	Ref2007_AS_27_181219	1	26.9165	92932900	precursor [M+2]	438936832
MS1_K9R17_2Ac	KSTGGKAPR	493.2749++	H3_9-17	Ref2007_AS_28_181219	1	26.012	23879230	precursor [M+2]	132928928
MS1_K9R17_2Ac	KSTGGKAPR	493.2749++	H3_9-17	Ref2007_AS_29_181219	1	25.8914	23472650	precursor [M+2]	146729312
MS1_K9R17_2Ac	KSTGGKAPR	493.2749++	H3_9-17	Ref2007_AS_30_181219	1	26.5144	59898540	precursor [M+2]	316117184
MS1_K9R17_2Ac	KSTGGKAPR	493.2749++	H3_9-17	Ref2007_AS_31_181219	1	26.7556	65350120	precursor [M+2]	290011616
MS1_K9R17_2Ac	KSTGGKAPR	493.2749++	H3_9-17	Ref2007_AS_32_181219	1	26.4541	47128720	precursor [M+2]	231337728
MS1_K9R17_2Ac	KSTGGKAPR	493.2749++	H3_9-17	Ref2007_AS_33_181219	1	26.9968	24713510	precursor [M+2]	84002432
MS1_K9R17_2Ac	KSTGGKAPR	493.2749++	H3_9-17	Ref2007_AS_34_181219	1	25.7908	53176370	precursor [M+2]	227669520
MS1_K9R17_2Ac	KSTGGKAPR	493.2749++	H3_9-17	Ref2007_AS_35_181219	1	26.5546	24876280	precursor [M+2]	150206080
MS1_K9R17_2Ac	KSTGGKAPR	493.2749++	H3_9-17	Ref2007_AS_QC0_181219	1	27.9616	49844330	precursor [M+2]	239341280
MS1_K9R17_2Ac	KSTGGKAPR	493.2749++	H3_9-17	Ref2007_AS_QC1_181219	1	27.0169	38820600	precursor [M+2]	177340736
MS1_K9R17_2Ac	KSTGGKAPR	493.2749++	H3_9-17	Ref2007_AS_QC2_181219	1	26.2531	53030130	precursor [M+2]	252476816
MS1_K9R17_2Ac	KSTGGKAPR	493.2749++	H3_9-17	Ref2007_AS_QC3_181219	1	26.9968	47364480	precursor [M+2]	226085056
MS1_K9R17_2Ac	KSTGGKAPR	493.2749++	H3_9-17	Ref2007_AS_QC4_181219	1	25.7908	41212160	precursor [M+2]	188859168
MS1_K9R17_2Ac	KSTGGKAPR	493.2749++	H3_9-17	Ref2007_AS_QC5_181219	1	25.9517	36866240	precursor [M+2]	166083232
MS1_K9R17_K9me1	KSTGGKAPR	503.3016++	H3_9-17	blank_00	0.666667	53.089	27212230	precursor	33301536
MS1_K9R17_K9me1	KSTGGKAPR	503.3016++	H3_9-17	blank_01	0.666667	52.5841	23089060	precursor	28503750
MS1_K9R17_K9me1	KSTGGKAPR	503.3016++	H3_9-17	Ref2007_AS_01_181219	1	37.5494	1696556000	precursor	2845695488
MS1_K9R17_K9me1	KSTGGKAPR	503.3016++	H3_9-17	Ref2007_AS_02_181219	1	37.5292	1119180000	precursor	1867089920
MS1_K9R17_K9me1	KSTGGKAPR	503.3016++	H3_9-17	Ref2007_AS_03_181219	1	36.082	1174465000	precursor	1982863744
MS1_K9R17_K9me1	KSTGGKAPR	503.3016++	H3_9-17	Ref2007_AS_04_181219	1	37.2881	985552600	precursor	1643273984
MS1_K9R17_K9me1	KSTGGKAPR	503.3016++	H3_9-17	Ref2007_AS_05_181219	1	37.3282	1422321000	precursor	2370652160
MS1_K9R17_K9me1	KSTGGKAPR	503.3016++	H3_9-17	Ref2007_AS_06_181219	1	37.0468	938025300	precursor	1567629312
MS1_K9R17_K9me1	KSTGGKAPR	503.3016++	H3_9-17	Ref2007_AS_07_181219	1	36.5644	1124168000	precursor	1893612416
MS1_K9R17_K9me1	KSTGGKAPR	503.3016++	H3_9-17	Ref2007_AS_08_181219	1	37.4489	1807726000	precursor	3031535872
MS1_K9R17_K9me1	KSTGGKAPR	503.3016++	H3_9-17	Ref2007_AS_09_181219	1	36.9464	1402762000	precursor	2344044288
MS1_K9R17_K9me1	KSTGGKAPR	503.3016++	H3_9-17	Ref2007_AS_10_181219	1	37.2478	1556970000	precursor	2596065280
MS1_K9R17_K9me1	KSTGGKAPR	503.3016++	H3_9-17	Ref2007_AS_11_181219	1	36.3634	948394000	precursor	1598118656
MS1_K9R17_K9me1	KSTGGKAPR	503.3016++	H3_9-17	Ref2007_AS_12_181219	1	37.6298	1286992000	precursor	2145728896
MS1_K9R17_K9me1	KSTGGKAPR	503.3016++	H3_9-17	Ref2007_AS_13_181219	1	37.1876	1168749000	precursor	1956573184
MS1_K9R17_K9me1	KSTGGKAPR	503.3016++	H3_9-17	Ref2007_AS_14_181219	1	37.2679	1926194000	precursor	3212911104
MS1_K9R17_K9me1	KSTGGKAPR	503.3016++	H3_9-17	Ref2007_AS_15_181219	1	37.1071	1531887000	precursor	2553622016
MS1_K9R17_K9me1	KSTGGKAPR	503.3016++	H3_9-17	Ref2007_AS_16_181219	1	37.5092	1551579000	precursor	2593164288
MS1_K9R17_K9me1	KSTGGKAPR	503.3016++	H3_9-17	Ref2007_AS_17_181219	1	37.3886	1169899000	precursor	1944737280
MS1_K9R17_K9me1	KSTGGKAPR	503.3016++	H3_9-17	Ref2007_AS_18_181219	1	37.1474	915752300	precursor	1524979840
MS1_K9R17_K9me1	KSTGGKAPR	503.3016++	H3_9-17	Ref2007_AS_19_181219	1	36.5845	747105800	precursor	1255723648
MS1_K9R17_K9me1	KSTGGKAPR	503.3016++	H3_9-17	Ref2007_AS_20_181219	1	37.2881	1540198000	precursor	2569002752
MS1_K9R17_K9me1	KSTGGKAPR	503.3016++	H3_9-17	Ref2007_AS_21_181219	1	36.4238	1614801000	precursor	2708207872
MS1_K9R17_K9me1	KSTGGKAPR	503.3016++	H3_9-17	Ref2007_AS_22_181219	1	37.3685	938383100	precursor	1564036864
MS1_K9R17_K9me1	KSTGGKAPR	503.3016++	H3_9-17	Ref2007_AS_23_181219	1	38.0814	1559086000	precursor	2603185152
MS1_K9R17_K9me1	KSTGGKAPR	503.3016++	H3_9-17	Ref2007_AS_24_181219	1	37.1272	1743390000	precursor	2905695488
MS1_K9R17_K9me1	KSTGGKAPR	503.3016++	H3_9-17	Ref2007_AS_25_181219	1	37.5493	1577654000	precursor	2637403648
MS1_K9R17_K9me1	KSTGGKAPR	503.3016++	H3_9-17	Ref2007_AS_26_181219	1	37.3483	1871972000	precursor	3117310976
MS1_K9R17_K9me1	KSTGGKAPR	503.3016++	H3_9-17	Ref2007_AS_27_181219	1	37.4489	2217058000	precursor	3704524800
MS1_K9R17_K9me1	KSTGGKAPR	503.3016++	H3_9-17	Ref2007_AS_28_181219	1	36.665	958440600	precursor	1595725952
MS1_K9R17_K9me1	KSTGGKAPR	503.3016++	H3_9-17	Ref2007_AS_29_181219	1	36.4439	2331439000	precursor	3886506752
MS1_K9R17_K9me1	KSTGGKAPR	503.3016++	H3_9-17	Ref2007_AS_30_181219	1	37.1875	2029944000	precursor	3399132160
MS1_K9R17_K9me1	KSTGGKAPR	503.3016++	H3_9-17	Ref2007_AS_31_181219	1	37.4086	1500554000	precursor	2501298688
MS1_K9R17_K9me1	KSTGGKAPR	503.3016++	H3_9-17	Ref2007_AS_32_181219	1	37.2478	1033262000	precursor	1720909184
MS1_K9R17_K9me1	KSTGGKAPR	503.3016++	H3_9-17	Ref2007_AS_33_181219	1	37.6498	1408756000	precursor	2352577280
MS1_K9R17_K9me1	KSTGGKAPR	503.3016++	H3_9-17	Ref2007_AS_34_181219	1	36.4036	1123304000	precursor	1872306176
MS1_K9R17_K9me1	KSTGGKAPR	503.3016++	H3_9-17	Ref2007_AS_35_181219	1	37.2277	1465876000	precursor	2439679232
MS1_K9R17_K9me1	KSTGGKAPR	503.3016++	H3_9-17	Ref2007_AS_QC0_181219	1	38.0518	1043964000	precursor	1737191168
MS1_K9R17_K9me1	KSTGGKAPR	503.3016++	H3_9-17	Ref2007_AS_QC1_181219	1	37.6096	877888900	precursor	1462049920
MS1_K9R17_K9me1	KSTGGKAPR	503.3016++	H3_9-17	Ref2007_AS_QC2_181219	1	37.1674	903263200	precursor	1507749632
MS1_K9R17_K9me1	KSTGGKAPR	503.3016++	H3_9-17	Ref2007_AS_QC3_181219	1	37.489	1075843000	precursor	1794797312
MS1_K9R17_K9me1	KSTGGKAPR	503.3016++	H3_9-17	Ref2007_AS_QC4_181219	1	36.6247	772977700	precursor	1292575744
MS1_K9R17_K9me1	KSTGGKAPR	503.3016++	H3_9-17	Ref2007_AS_QC5_181219	1	36.665	749588800	precursor	1260094208
MS1_K9R17_K9me1	KSTGGKAPR	503.3016++	H3_9-17	blank_00	0.666667	53.089	0	precursor [M+1]	33301536
MS1_K9R17_K9me1	KSTGGKAPR	503.3016++	H3_9-17	blank_01	0.666667	52.5841	0	precursor [M+1]	28503750
MS1_K9R17_K9me1	KSTGGKAPR	503.3016++	H3_9-17	Ref2007_AS_01_181219	1	37.5494	875145700	precursor [M+1]	2845695488
MS1_K9R17_K9me1	KSTGGKAPR	503.3016++	H3_9-17	Ref2007_AS_02_181219	1	37.5292	567073600	precursor [M+1]	1867089920
MS1_K9R17_K9me1	KSTGGKAPR	503.3016++	H3_9-17	Ref2007_AS_03_181219	1	36.082	618121300	precursor [M+1]	1982863744
MS1_K9R17_K9me1	KSTGGKAPR	503.3016++	H3_9-17	Ref2007_AS_04_181219	1	37.2881	496378500	precursor [M+1]	1643273984
MS1_K9R17_K9me1	KSTGGKAPR	503.3016++	H3_9-17	Ref2007_AS_05_181219	1	37.3282	718674000	precursor [M+1]	2370652160
MS1_K9R17_K9me1	KSTGGKAPR	503.3016++	H3_9-17	Ref2007_AS_06_181219	1	37.0468	478781200	precursor [M+1]	1567629312
MS1_K9R17_K9me1	KSTGGKAPR	503.3016++	H3_9-17	Ref2007_AS_07_181219	1	36.5644	589489000	precursor [M+1]	1893612416
MS1_K9R17_K9me1	KSTGGKAPR	503.3016++	H3_9-17	Ref2007_AS_08_181219	1	37.4489	929243600	precursor [M+1]	3031535872
MS1_K9R17_K9me1	KSTGGKAPR	503.3016++	H3_9-17	Ref2007_AS_09_181219	1	36.9464	710654000	precursor [M+1]	2344044288
MS1_K9R17_K9me1	KSTGGKAPR	503.3016++	H3_9-17	Ref2007_AS_10_181219	1	37.2478	788409200	precursor [M+1]	2596065280
MS1_K9R17_K9me1	KSTGGKAPR	503.3016++	H3_9-17	Ref2007_AS_11_181219	1	36.3634	493024600	precursor [M+1]	1598118656
MS1_K9R17_K9me1	KSTGGKAPR	503.3016++	H3_9-17	Ref2007_AS_12_181219	1	37.6298	651345000	precursor [M+1]	2145728896
MS1_K9R17_K9me1	KSTGGKAPR	503.3016++	H3_9-17	Ref2007_AS_13_181219	1	37.1876	598533800	precursor [M+1]	1956573184
MS1_K9R17_K9me1	KSTGGKAPR	503.3016++	H3_9-17	Ref2007_AS_14_181219	1	37.2679	973884400	precursor [M+1]	3212911104
MS1_K9R17_K9me1	KSTGGKAPR	503.3016++	H3_9-17	Ref2007_AS_15_181219	1	37.1071	774367000	precursor [M+1]	2553622016
MS1_K9R17_K9me1	KSTGGKAPR	503.3016++	H3_9-17	Ref2007_AS_16_181219	1	37.5092	789804500	precursor [M+1]	2593164288
MS1_K9R17_K9me1	KSTGGKAPR	503.3016++	H3_9-17	Ref2007_AS_17_181219	1	37.3886	586791500	precursor [M+1]	1944737280
MS1_K9R17_K9me1	KSTGGKAPR	503.3016++	H3_9-17	Ref2007_AS_18_181219	1	37.1474	461604400	precursor [M+1]	1524979840
MS1_K9R17_K9me1	KSTGGKAPR	503.3016++	H3_9-17	Ref2007_AS_19_181219	1	36.5845	387812000	precursor [M+1]	1255723648
MS1_K9R17_K9me1	KSTGGKAPR	503.3016++	H3_9-17	Ref2007_AS_20_181219	1	37.2881	778781600	precursor [M+1]	2569002752
MS1_K9R17_K9me1	KSTGGKAPR	503.3016++	H3_9-17	Ref2007_AS_21_181219	1	36.4238	835121400	precursor [M+1]	2708207872
MS1_K9R17_K9me1	KSTGGKAPR	503.3016++	H3_9-17	Ref2007_AS_22_181219	1	37.3685	475964600	precursor [M+1]	1564036864
MS1_K9R17_K9me1	KSTGGKAPR	503.3016++	H3_9-17	Ref2007_AS_23_181219	1	38.0814	797893700	precursor [M+1]	2603185152
MS1_K9R17_K9me1	KSTGGKAPR	503.3016++	H3_9-17	Ref2007_AS_24_181219	1	37.1272	883795100	precursor [M+1]	2905695488
MS1_K9R17_K9me1	KSTGGKAPR	503.3016++	H3_9-17	Ref2007_AS_25_181219	1	37.5493	806767100	precursor [M+1]	2637403648
MS1_K9R17_K9me1	KSTGGKAPR	503.3016++	H3_9-17	Ref2007_AS_26_181219	1	37.3483	944836700	precursor [M+1]	3117310976
MS1_K9R17_K9me1	KSTGGKAPR	503.3016++	H3_9-17	Ref2007_AS_27_181219	1	37.4489	1127851000	precursor [M+1]	3704524800
MS1_K9R17_K9me1	KSTGGKAPR	503.3016++	H3_9-17	Ref2007_AS_28_181219	1	36.665	483001900	precursor [M+1]	1595725952
MS1_K9R17_K9me1	KSTGGKAPR	503.3016++	H3_9-17	Ref2007_AS_29_181219	1	36.4439	1179153000	precursor [M+1]	3886506752
MS1_K9R17_K9me1	KSTGGKAPR	503.3016++	H3_9-17	Ref2007_AS_30_181219	1	37.1875	1038569000	precursor [M+1]	3399132160
MS1_K9R17_K9me1	KSTGGKAPR	503.3016++	H3_9-17	Ref2007_AS_31_181219	1	37.4086	759355600	precursor [M+1]	2501298688
MS1_K9R17_K9me1	KSTGGKAPR	503.3016++	H3_9-17	Ref2007_AS_32_181219	1	37.2478	522594700	precursor [M+1]	1720909184
MS1_K9R17_K9me1	KSTGGKAPR	503.3016++	H3_9-17	Ref2007_AS_33_181219	1	37.6498	718986300	precursor [M+1]	2352577280
MS1_K9R17_K9me1	KSTGGKAPR	503.3016++	H3_9-17	Ref2007_AS_34_181219	1	36.4036	568196600	precursor [M+1]	1872306176
MS1_K9R17_K9me1	KSTGGKAPR	503.3016++	H3_9-17	Ref2007_AS_35_181219	1	37.2277	738827500	precursor [M+1]	2439679232
MS1_K9R17_K9me1	KSTGGKAPR	503.3016++	H3_9-17	Ref2007_AS_QC0_181219	1	38.0518	525333500	precursor [M+1]	1737191168
MS1_K9R17_K9me1	KSTGGKAPR	503.3016++	H3_9-17	Ref2007_AS_QC1_181219	1	37.6096	441586700	precursor [M+1]	1462049920
MS1_K9R17_K9me1	KSTGGKAPR	503.3016++	H3_9-17	Ref2007_AS_QC2_181219	1	37.1674	459491300	precursor [M+1]	1507749632
MS1_K9R17_K9me1	KSTGGKAPR	503.3016++	H3_9-17	Ref2007_AS_QC3_181219	1	37.489	544689500	precursor [M+1]	1794797312
MS1_K9R17_K9me1	KSTGGKAPR	503.3016++	H3_9-17	Ref2007_AS_QC4_181219	1	36.6247	394683400	precursor [M+1]	1292575744
MS1_K9R17_K9me1	KSTGGKAPR	503.3016++	H3_9-17	Ref2007_AS_QC5_181219	1	36.665	388402200	precursor [M+1]	1260094208
MS1_K9R17_K9me1	KSTGGKAPR	503.3016++	H3_9-17	blank_00	0.666667	53.089	6089308	precursor [M+2]	33301536
MS1_K9R17_K9me1	KSTGGKAPR	503.3016++	H3_9-17	blank_01	0.666667	52.5841	5414690	precursor [M+2]	28503750
MS1_K9R17_K9me1	KSTGGKAPR	503.3016++	H3_9-17	Ref2007_AS_01_181219	1	37.5494	273993200	precursor [M+2]	2845695488
MS1_K9R17_K9me1	KSTGGKAPR	503.3016++	H3_9-17	Ref2007_AS_02_181219	1	37.5292	180836800	precursor [M+2]	1867089920
MS1_K9R17_K9me1	KSTGGKAPR	503.3016++	H3_9-17	Ref2007_AS_03_181219	1	36.082	190277100	precursor [M+2]	1982863744
MS1_K9R17_K9me1	KSTGGKAPR	503.3016++	H3_9-17	Ref2007_AS_04_181219	1	37.2881	161343000	precursor [M+2]	1643273984
MS1_K9R17_K9me1	KSTGGKAPR	503.3016++	H3_9-17	Ref2007_AS_05_181219	1	37.3282	229657300	precursor [M+2]	2370652160
MS1_K9R17_K9me1	KSTGGKAPR	503.3016++	H3_9-17	Ref2007_AS_06_181219	1	37.0468	150822700	precursor [M+2]	1567629312
MS1_K9R17_K9me1	KSTGGKAPR	503.3016++	H3_9-17	Ref2007_AS_07_181219	1	36.5644	179955200	precursor [M+2]	1893612416
MS1_K9R17_K9me1	KSTGGKAPR	503.3016++	H3_9-17	Ref2007_AS_08_181219	1	37.4489	294566800	precursor [M+2]	3031535872
MS1_K9R17_K9me1	KSTGGKAPR	503.3016++	H3_9-17	Ref2007_AS_09_181219	1	36.9464	230628200	precursor [M+2]	2344044288
MS1_K9R17_K9me1	KSTGGKAPR	503.3016++	H3_9-17	Ref2007_AS_10_181219	1	37.2478	250686300	precursor [M+2]	2596065280
MS1_K9R17_K9me1	KSTGGKAPR	503.3016++	H3_9-17	Ref2007_AS_11_181219	1	36.3634	156700000	precursor [M+2]	1598118656
MS1_K9R17_K9me1	KSTGGKAPR	503.3016++	H3_9-17	Ref2007_AS_12_181219	1	37.6298	207391600	precursor [M+2]	2145728896
MS1_K9R17_K9me1	KSTGGKAPR	503.3016++	H3_9-17	Ref2007_AS_13_181219	1	37.1876	189290800	precursor [M+2]	1956573184
MS1_K9R17_K9me1	KSTGGKAPR	503.3016++	H3_9-17	Ref2007_AS_14_181219	1	37.2679	312832400	precursor [M+2]	3212911104
MS1_K9R17_K9me1	KSTGGKAPR	503.3016++	H3_9-17	Ref2007_AS_15_181219	1	37.1071	247367600	precursor [M+2]	2553622016
MS1_K9R17_K9me1	KSTGGKAPR	503.3016++	H3_9-17	Ref2007_AS_16_181219	1	37.5092	251780700	precursor [M+2]	2593164288
MS1_K9R17_K9me1	KSTGGKAPR	503.3016++	H3_9-17	Ref2007_AS_17_181219	1	37.3886	188047100	precursor [M+2]	1944737280
MS1_K9R17_K9me1	KSTGGKAPR	503.3016++	H3_9-17	Ref2007_AS_18_181219	1	37.1474	147623000	precursor [M+2]	1524979840
MS1_K9R17_K9me1	KSTGGKAPR	503.3016++	H3_9-17	Ref2007_AS_19_181219	1	36.5845	120805700	precursor [M+2]	1255723648
MS1_K9R17_K9me1	KSTGGKAPR	503.3016++	H3_9-17	Ref2007_AS_20_181219	1	37.2881	250022600	precursor [M+2]	2569002752
MS1_K9R17_K9me1	KSTGGKAPR	503.3016++	H3_9-17	Ref2007_AS_21_181219	1	36.4238	258285900	precursor [M+2]	2708207872
MS1_K9R17_K9me1	KSTGGKAPR	503.3016++	H3_9-17	Ref2007_AS_22_181219	1	37.3685	149689100	precursor [M+2]	1564036864
MS1_K9R17_K9me1	KSTGGKAPR	503.3016++	H3_9-17	Ref2007_AS_23_181219	1	38.0814	246204800	precursor [M+2]	2603185152
MS1_K9R17_K9me1	KSTGGKAPR	503.3016++	H3_9-17	Ref2007_AS_24_181219	1	37.1272	278509700	precursor [M+2]	2905695488
MS1_K9R17_K9me1	KSTGGKAPR	503.3016++	H3_9-17	Ref2007_AS_25_181219	1	37.5493	252982900	precursor [M+2]	2637403648
MS1_K9R17_K9me1	KSTGGKAPR	503.3016++	H3_9-17	Ref2007_AS_26_181219	1	37.3483	300502000	precursor [M+2]	3117310976
MS1_K9R17_K9me1	KSTGGKAPR	503.3016++	H3_9-17	Ref2007_AS_27_181219	1	37.4489	359616000	precursor [M+2]	3704524800
MS1_K9R17_K9me1	KSTGGKAPR	503.3016++	H3_9-17	Ref2007_AS_28_181219	1	36.665	154283400	precursor [M+2]	1595725952
MS1_K9R17_K9me1	KSTGGKAPR	503.3016++	H3_9-17	Ref2007_AS_29_181219	1	36.4439	375914300	precursor [M+2]	3886506752
MS1_K9R17_K9me1	KSTGGKAPR	503.3016++	H3_9-17	Ref2007_AS_30_181219	1	37.1875	330619100	precursor [M+2]	3399132160
MS1_K9R17_K9me1	KSTGGKAPR	503.3016++	H3_9-17	Ref2007_AS_31_181219	1	37.4086	241389100	precursor [M+2]	2501298688
MS1_K9R17_K9me1	KSTGGKAPR	503.3016++	H3_9-17	Ref2007_AS_32_181219	1	37.2478	165052300	precursor [M+2]	1720909184
MS1_K9R17_K9me1	KSTGGKAPR	503.3016++	H3_9-17	Ref2007_AS_33_181219	1	37.6498	224834700	precursor [M+2]	2352577280
MS1_K9R17_K9me1	KSTGGKAPR	503.3016++	H3_9-17	Ref2007_AS_34_181219	1	36.4036	180805400	precursor [M+2]	1872306176
MS1_K9R17_K9me1	KSTGGKAPR	503.3016++	H3_9-17	Ref2007_AS_35_181219	1	37.2277	234976000	precursor [M+2]	2439679232
MS1_K9R17_K9me1	KSTGGKAPR	503.3016++	H3_9-17	Ref2007_AS_QC0_181219	1	38.0518	167894100	precursor [M+2]	1737191168
MS1_K9R17_K9me1	KSTGGKAPR	503.3016++	H3_9-17	Ref2007_AS_QC1_181219	1	37.6096	142574400	precursor [M+2]	1462049920
MS1_K9R17_K9me1	KSTGGKAPR	503.3016++	H3_9-17	Ref2007_AS_QC2_181219	1	37.1674	144995300	precursor [M+2]	1507749632
MS1_K9R17_K9me1	KSTGGKAPR	503.3016++	H3_9-17	Ref2007_AS_QC3_181219	1	37.489	174265200	precursor [M+2]	1794797312
MS1_K9R17_K9me1	KSTGGKAPR	503.3016++	H3_9-17	Ref2007_AS_QC4_181219	1	36.6247	124914600	precursor [M+2]	1292575744
MS1_K9R17_K9me1	KSTGGKAPR	503.3016++	H3_9-17	Ref2007_AS_QC5_181219	1	36.665	122103200	precursor [M+2]	1260094208
MS1_K9R17_K9me1_K14ac	KSTGGKAPR	501.7921++	H3_9-17	blank_00	0.666667	63.8842	53720	precursor	1.48105e+06
MS1_K9R17_K9me1_K14ac	KSTGGKAPR	501.7921++	H3_9-17	blank_01	0.333333	61.4482	0	precursor	6.1189e+06
MS1_K9R17_K9me1_K14ac	KSTGGKAPR	501.7921++	H3_9-17	Ref2007_AS_01_181219	1	37.5896	939790500	precursor	1609832704
MS1_K9R17_K9me1_K14ac	KSTGGKAPR	501.7921++	H3_9-17	Ref2007_AS_02_181219	1	37.5292	544760400	precursor	927870144
MS1_K9R17_K9me1_K14ac	KSTGGKAPR	501.7921++	H3_9-17	Ref2007_AS_03_181219	1	36.2227	585348200	precursor	1007191168
MS1_K9R17_K9me1_K14ac	KSTGGKAPR	501.7921++	H3_9-17	Ref2007_AS_04_181219	1	37.3082	510524800	precursor	873148288
MS1_K9R17_K9me1_K14ac	KSTGGKAPR	501.7921++	H3_9-17	Ref2007_AS_05_181219	1	37.4086	709205600	precursor	1217245440
MS1_K9R17_K9me1_K14ac	KSTGGKAPR	501.7921++	H3_9-17	Ref2007_AS_06_181219	1	37.1272	502095100	precursor	862636736
MS1_K9R17_K9me1_K14ac	KSTGGKAPR	501.7921++	H3_9-17	Ref2007_AS_07_181219	1	36.6448	526898900	precursor	901664960
MS1_K9R17_K9me1_K14ac	KSTGGKAPR	501.7921++	H3_9-17	Ref2007_AS_08_181219	1	37.5293	791771100	precursor	1367099264
MS1_K9R17_K9me1_K14ac	KSTGGKAPR	501.7921++	H3_9-17	Ref2007_AS_09_181219	1	37.0268	597628500	precursor	1027392064
MS1_K9R17_K9me1_K14ac	KSTGGKAPR	501.7921++	H3_9-17	Ref2007_AS_10_181219	1	37.2478	785244400	precursor	1348417792
MS1_K9R17_K9me1_K14ac	KSTGGKAPR	501.7921++	H3_9-17	Ref2007_AS_11_181219	1	36.5041	426868400	precursor	733180032
MS1_K9R17_K9me1_K14ac	KSTGGKAPR	501.7921++	H3_9-17	Ref2007_AS_12_181219	1	37.6499	705502500	precursor	1204901504
MS1_K9R17_K9me1_K14ac	KSTGGKAPR	501.7921++	H3_9-17	Ref2007_AS_13_181219	1	37.1876	572030100	precursor	983034944
MS1_K9R17_K9me1_K14ac	KSTGGKAPR	501.7921++	H3_9-17	Ref2007_AS_14_181219	1	37.3282	1034595000	precursor	1774404736
MS1_K9R17_K9me1_K14ac	KSTGGKAPR	501.7921++	H3_9-17	Ref2007_AS_15_181219	1	37.1674	813569200	precursor	1398256128
MS1_K9R17_K9me1_K14ac	KSTGGKAPR	501.7921++	H3_9-17	Ref2007_AS_16_181219	1	37.6097	821613100	precursor	1402221312
MS1_K9R17_K9me1_K14ac	KSTGGKAPR	501.7921++	H3_9-17	Ref2007_AS_17_181219	1	37.4489	616771800	precursor	1054518272
MS1_K9R17_K9me1_K14ac	KSTGGKAPR	501.7921++	H3_9-17	Ref2007_AS_18_181219	1	37.2077	548939900	precursor	936829568
MS1_K9R17_K9me1_K14ac	KSTGGKAPR	501.7921++	H3_9-17	Ref2007_AS_19_181219	1	36.5845	356945700	precursor	616950656
MS1_K9R17_K9me1_K14ac	KSTGGKAPR	501.7921++	H3_9-17	Ref2007_AS_20_181219	1	37.2881	729908200	precursor	1253063424
MS1_K9R17_K9me1_K14ac	KSTGGKAPR	501.7921++	H3_9-17	Ref2007_AS_21_181219	1	36.6047	655358300	precursor	1138058752
MS1_K9R17_K9me1_K14ac	KSTGGKAPR	501.7921++	H3_9-17	Ref2007_AS_22_181219	1	37.4087	457781800	precursor	783640960
MS1_K9R17_K9me1_K14ac	KSTGGKAPR	501.7921++	H3_9-17	Ref2007_AS_23_181219	1	38.1393	785612700	precursor	1339053312
MS1_K9R17_K9me1_K14ac	KSTGGKAPR	501.7921++	H3_9-17	Ref2007_AS_24_181219	1	37.1875	736294800	precursor	1271518592
MS1_K9R17_K9me1_K14ac	KSTGGKAPR	501.7921++	H3_9-17	Ref2007_AS_25_181219	1	37.5895	684796900	precursor	1180724480
MS1_K9R17_K9me1_K14ac	KSTGGKAPR	501.7921++	H3_9-17	Ref2007_AS_26_181219	1	37.3885	794213400	precursor	1367804160
MS1_K9R17_K9me1_K14ac	KSTGGKAPR	501.7921++	H3_9-17	Ref2007_AS_27_181219	1	37.469	980892000	precursor	1687521024
MS1_K9R17_K9me1_K14ac	KSTGGKAPR	501.7921++	H3_9-17	Ref2007_AS_28_181219	1	36.7856	443194800	precursor	762567040
MS1_K9R17_K9me1_K14ac	KSTGGKAPR	501.7921++	H3_9-17	Ref2007_AS_29_181219	1	36.5243	1096141000	precursor	1877674240
MS1_K9R17_K9me1_K14ac	KSTGGKAPR	501.7921++	H3_9-17	Ref2007_AS_30_181219	1	37.2277	883130200	precursor	1528044032
MS1_K9R17_K9me1_K14ac	KSTGGKAPR	501.7921++	H3_9-17	Ref2007_AS_31_181219	1	37.4086	643773600	precursor	1108173056
MS1_K9R17_K9me1_K14ac	KSTGGKAPR	501.7921++	H3_9-17	Ref2007_AS_32_181219	1	37.3483	493199200	precursor	846644992
MS1_K9R17_K9me1_K14ac	KSTGGKAPR	501.7921++	H3_9-17	Ref2007_AS_33_181219	1	37.6498	636890700	precursor	1093183232
MS1_K9R17_K9me1_K14ac	KSTGGKAPR	501.7921++	H3_9-17	Ref2007_AS_34_181219	1	36.5242	495562700	precursor	849566720
MS1_K9R17_K9me1_K14ac	KSTGGKAPR	501.7921++	H3_9-17	Ref2007_AS_35_181219	1	37.2277	665831900	precursor	1149370368
MS1_K9R17_K9me1_K14ac	KSTGGKAPR	501.7921++	H3_9-17	Ref2007_AS_QC0_181219	1	38.0719	504935600	precursor	865150208
MS1_K9R17_K9me1_K14ac	KSTGGKAPR	501.7921++	H3_9-17	Ref2007_AS_QC1_181219	1	37.6297	419911500	precursor	718486528
MS1_K9R17_K9me1_K14ac	KSTGGKAPR	501.7921++	H3_9-17	Ref2007_AS_QC2_181219	1	37.1674	430122000	precursor	739202112
MS1_K9R17_K9me1_K14ac	KSTGGKAPR	501.7921++	H3_9-17	Ref2007_AS_QC3_181219	1	37.5091	512101000	precursor	878138176
MS1_K9R17_K9me1_K14ac	KSTGGKAPR	501.7921++	H3_9-17	Ref2007_AS_QC4_181219	1	36.7252	363199000	precursor	623625088
MS1_K9R17_K9me1_K14ac	KSTGGKAPR	501.7921++	H3_9-17	Ref2007_AS_QC5_181219	1	36.7253	348813400	precursor	600200576
MS1_K9R17_K9me1_K14ac	KSTGGKAPR	501.7921++	H3_9-17	blank_00	0.666667	63.8842	1427334	precursor [M+1]	1.48105e+06
MS1_K9R17_K9me1_K14ac	KSTGGKAPR	501.7921++	H3_9-17	blank_01	0.333333	61.4482	6118904	precursor [M+1]	6.1189e+06
MS1_K9R17_K9me1_K14ac	KSTGGKAPR	501.7921++	H3_9-17	Ref2007_AS_01_181219	1	37.5896	486651900	precursor [M+1]	1609832704
MS1_K9R17_K9me1_K14ac	KSTGGKAPR	501.7921++	H3_9-17	Ref2007_AS_02_181219	1	37.5292	278079500	precursor [M+1]	927870144
MS1_K9R17_K9me1_K14ac	KSTGGKAPR	501.7921++	H3_9-17	Ref2007_AS_03_181219	1	36.2227	304810100	precursor [M+1]	1007191168
MS1_K9R17_K9me1_K14ac	KSTGGKAPR	501.7921++	H3_9-17	Ref2007_AS_04_181219	1	37.3082	262003500	precursor [M+1]	873148288
MS1_K9R17_K9me1_K14ac	KSTGGKAPR	501.7921++	H3_9-17	Ref2007_AS_05_181219	1	37.4086	365115100	precursor [M+1]	1217245440
MS1_K9R17_K9me1_K14ac	KSTGGKAPR	501.7921++	H3_9-17	Ref2007_AS_06_181219	1	37.1272	261155800	precursor [M+1]	862636736
MS1_K9R17_K9me1_K14ac	KSTGGKAPR	501.7921++	H3_9-17	Ref2007_AS_07_181219	1	36.6448	269661600	precursor [M+1]	901664960
MS1_K9R17_K9me1_K14ac	KSTGGKAPR	501.7921++	H3_9-17	Ref2007_AS_08_181219	1	37.5293	409830200	precursor [M+1]	1367099264
MS1_K9R17_K9me1_K14ac	KSTGGKAPR	501.7921++	H3_9-17	Ref2007_AS_09_181219	1	37.0268	308002000	precursor [M+1]	1027392064
MS1_K9R17_K9me1_K14ac	KSTGGKAPR	501.7921++	H3_9-17	Ref2007_AS_10_181219	1	37.2478	408495900	precursor [M+1]	1348417792
MS1_K9R17_K9me1_K14ac	KSTGGKAPR	501.7921++	H3_9-17	Ref2007_AS_11_181219	1	36.5041	222034200	precursor [M+1]	733180032
MS1_K9R17_K9me1_K14ac	KSTGGKAPR	501.7921++	H3_9-17	Ref2007_AS_12_181219	1	37.6499	363365400	precursor [M+1]	1204901504
MS1_K9R17_K9me1_K14ac	KSTGGKAPR	501.7921++	H3_9-17	Ref2007_AS_13_181219	1	37.1876	296476700	precursor [M+1]	983034944
MS1_K9R17_K9me1_K14ac	KSTGGKAPR	501.7921++	H3_9-17	Ref2007_AS_14_181219	1	37.3282	536271200	precursor [M+1]	1774404736
MS1_K9R17_K9me1_K14ac	KSTGGKAPR	501.7921++	H3_9-17	Ref2007_AS_15_181219	1	37.1674	420524900	precursor [M+1]	1398256128
MS1_K9R17_K9me1_K14ac	KSTGGKAPR	501.7921++	H3_9-17	Ref2007_AS_16_181219	1	37.6097	422066900	precursor [M+1]	1402221312
MS1_K9R17_K9me1_K14ac	KSTGGKAPR	501.7921++	H3_9-17	Ref2007_AS_17_181219	1	37.4489	318025700	precursor [M+1]	1054518272
MS1_K9R17_K9me1_K14ac	KSTGGKAPR	501.7921++	H3_9-17	Ref2007_AS_18_181219	1	37.2077	282799000	precursor [M+1]	936829568
MS1_K9R17_K9me1_K14ac	KSTGGKAPR	501.7921++	H3_9-17	Ref2007_AS_19_181219	1	36.5845	189714000	precursor [M+1]	616950656
MS1_K9R17_K9me1_K14ac	KSTGGKAPR	501.7921++	H3_9-17	Ref2007_AS_20_181219	1	37.2881	372157400	precursor [M+1]	1253063424
MS1_K9R17_K9me1_K14ac	KSTGGKAPR	501.7921++	H3_9-17	Ref2007_AS_21_181219	1	36.6047	348052000	precursor [M+1]	1138058752
MS1_K9R17_K9me1_K14ac	KSTGGKAPR	501.7921++	H3_9-17	Ref2007_AS_22_181219	1	37.4087	233238400	precursor [M+1]	783640960
MS1_K9R17_K9me1_K14ac	KSTGGKAPR	501.7921++	H3_9-17	Ref2007_AS_23_181219	1	38.1393	403437600	precursor [M+1]	1339053312
MS1_K9R17_K9me1_K14ac	KSTGGKAPR	501.7921++	H3_9-17	Ref2007_AS_24_181219	1	37.1875	385596000	precursor [M+1]	1271518592
MS1_K9R17_K9me1_K14ac	KSTGGKAPR	501.7921++	H3_9-17	Ref2007_AS_25_181219	1	37.5895	352567500	precursor [M+1]	1180724480
MS1_K9R17_K9me1_K14ac	KSTGGKAPR	501.7921++	H3_9-17	Ref2007_AS_26_181219	1	37.3885	411103800	precursor [M+1]	1367804160
MS1_K9R17_K9me1_K14ac	KSTGGKAPR	501.7921++	H3_9-17	Ref2007_AS_27_181219	1	37.469	508357200	precursor [M+1]	1687521024
MS1_K9R17_K9me1_K14ac	KSTGGKAPR	501.7921++	H3_9-17	Ref2007_AS_28_181219	1	36.7856	230229300	precursor [M+1]	762567040
MS1_K9R17_K9me1_K14ac	KSTGGKAPR	501.7921++	H3_9-17	Ref2007_AS_29_181219	1	36.5243	564640100	precursor [M+1]	1877674240
MS1_K9R17_K9me1_K14ac	KSTGGKAPR	501.7921++	H3_9-17	Ref2007_AS_30_181219	1	37.2277	463384100	precursor [M+1]	1528044032
MS1_K9R17_K9me1_K14ac	KSTGGKAPR	501.7921++	H3_9-17	Ref2007_AS_31_181219	1	37.4086	333466400	precursor [M+1]	1108173056
MS1_K9R17_K9me1_K14ac	KSTGGKAPR	501.7921++	H3_9-17	Ref2007_AS_32_181219	1	37.3483	254550500	precursor [M+1]	846644992
MS1_K9R17_K9me1_K14ac	KSTGGKAPR	501.7921++	H3_9-17	Ref2007_AS_33_181219	1	37.6498	325179600	precursor [M+1]	1093183232
MS1_K9R17_K9me1_K14ac	KSTGGKAPR	501.7921++	H3_9-17	Ref2007_AS_34_181219	1	36.5242	255194500	precursor [M+1]	849566720
MS1_K9R17_K9me1_K14ac	KSTGGKAPR	501.7921++	H3_9-17	Ref2007_AS_35_181219	1	37.2277	346936700	precursor [M+1]	1149370368
MS1_K9R17_K9me1_K14ac	KSTGGKAPR	501.7921++	H3_9-17	Ref2007_AS_QC0_181219	1	38.0719	260547700	precursor [M+1]	865150208
MS1_K9R17_K9me1_K14ac	KSTGGKAPR	501.7921++	H3_9-17	Ref2007_AS_QC1_181219	1	37.6297	216242600	precursor [M+1]	718486528
MS1_K9R17_K9me1_K14ac	KSTGGKAPR	501.7921++	H3_9-17	Ref2007_AS_QC2_181219	1	37.1674	224360700	precursor [M+1]	739202112
MS1_K9R17_K9me1_K14ac	KSTGGKAPR	501.7921++	H3_9-17	Ref2007_AS_QC3_181219	1	37.5091	265025100	precursor [M+1]	878138176
MS1_K9R17_K9me1_K14ac	KSTGGKAPR	501.7921++	H3_9-17	Ref2007_AS_QC4_181219	1	36.7252	187712200	precursor [M+1]	623625088
MS1_K9R17_K9me1_K14ac	KSTGGKAPR	501.7921++	H3_9-17	Ref2007_AS_QC5_181219	1	36.7253	181671800	precursor [M+1]	600200576
MS1_K9R17_K9me1_K14ac	KSTGGKAPR	501.7921++	H3_9-17	blank_00	0.666667	63.8842	0	precursor [M+2]	1.48105e+06
MS1_K9R17_K9me1_K14ac	KSTGGKAPR	501.7921++	H3_9-17	blank_01	0.333333	61.4482	0	precursor [M+2]	6.1189e+06
MS1_K9R17_K9me1_K14ac	KSTGGKAPR	501.7921++	H3_9-17	Ref2007_AS_01_181219	1	37.5896	183390300	precursor [M+2]	1609832704
MS1_K9R17_K9me1_K14ac	KSTGGKAPR	501.7921++	H3_9-17	Ref2007_AS_02_181219	1	37.5292	105030200	precursor [M+2]	927870144
MS1_K9R17_K9me1_K14ac	KSTGGKAPR	501.7921++	H3_9-17	Ref2007_AS_03_181219	1	36.2227	117032900	precursor [M+2]	1007191168
MS1_K9R17_K9me1_K14ac	KSTGGKAPR	501.7921++	H3_9-17	Ref2007_AS_04_181219	1	37.3082	100620000	precursor [M+2]	873148288
MS1_K9R17_K9me1_K14ac	KSTGGKAPR	501.7921++	H3_9-17	Ref2007_AS_05_181219	1	37.4086	142924800	precursor [M+2]	1217245440
MS1_K9R17_K9me1_K14ac	KSTGGKAPR	501.7921++	H3_9-17	Ref2007_AS_06_181219	1	37.1272	99385940	precursor [M+2]	862636736
MS1_K9R17_K9me1_K14ac	KSTGGKAPR	501.7921++	H3_9-17	Ref2007_AS_07_181219	1	36.6448	105104400	precursor [M+2]	901664960
MS1_K9R17_K9me1_K14ac	KSTGGKAPR	501.7921++	H3_9-17	Ref2007_AS_08_181219	1	37.5293	165498000	precursor [M+2]	1367099264
MS1_K9R17_K9me1_K14ac	KSTGGKAPR	501.7921++	H3_9-17	Ref2007_AS_09_181219	1	37.0268	121761500	precursor [M+2]	1027392064
MS1_K9R17_K9me1_K14ac	KSTGGKAPR	501.7921++	H3_9-17	Ref2007_AS_10_181219	1	37.2478	154677500	precursor [M+2]	1348417792
MS1_K9R17_K9me1_K14ac	KSTGGKAPR	501.7921++	H3_9-17	Ref2007_AS_11_181219	1	36.5041	84277420	precursor [M+2]	733180032
MS1_K9R17_K9me1_K14ac	KSTGGKAPR	501.7921++	H3_9-17	Ref2007_AS_12_181219	1	37.6499	136033700	precursor [M+2]	1204901504
MS1_K9R17_K9me1_K14ac	KSTGGKAPR	501.7921++	H3_9-17	Ref2007_AS_13_181219	1	37.1876	114528100	precursor [M+2]	983034944
MS1_K9R17_K9me1_K14ac	KSTGGKAPR	501.7921++	H3_9-17	Ref2007_AS_14_181219	1	37.3282	203538900	precursor [M+2]	1774404736
MS1_K9R17_K9me1_K14ac	KSTGGKAPR	501.7921++	H3_9-17	Ref2007_AS_15_181219	1	37.1674	164162000	precursor [M+2]	1398256128
MS1_K9R17_K9me1_K14ac	KSTGGKAPR	501.7921++	H3_9-17	Ref2007_AS_16_181219	1	37.6097	158541200	precursor [M+2]	1402221312
MS1_K9R17_K9me1_K14ac	KSTGGKAPR	501.7921++	H3_9-17	Ref2007_AS_17_181219	1	37.4489	119720800	precursor [M+2]	1054518272
MS1_K9R17_K9me1_K14ac	KSTGGKAPR	501.7921++	H3_9-17	Ref2007_AS_18_181219	1	37.2077	105090600	precursor [M+2]	936829568
MS1_K9R17_K9me1_K14ac	KSTGGKAPR	501.7921++	H3_9-17	Ref2007_AS_19_181219	1	36.5845	70290910	precursor [M+2]	616950656
MS1_K9R17_K9me1_K14ac	KSTGGKAPR	501.7921++	H3_9-17	Ref2007_AS_20_181219	1	37.2881	150997900	precursor [M+2]	1253063424
MS1_K9R17_K9me1_K14ac	KSTGGKAPR	501.7921++	H3_9-17	Ref2007_AS_21_181219	1	36.6047	134648500	precursor [M+2]	1138058752
MS1_K9R17_K9me1_K14ac	KSTGGKAPR	501.7921++	H3_9-17	Ref2007_AS_22_181219	1	37.4087	92620800	precursor [M+2]	783640960
MS1_K9R17_K9me1_K14ac	KSTGGKAPR	501.7921++	H3_9-17	Ref2007_AS_23_181219	1	38.1393	150003000	precursor [M+2]	1339053312
MS1_K9R17_K9me1_K14ac	KSTGGKAPR	501.7921++	H3_9-17	Ref2007_AS_24_181219	1	37.1875	149627800	precursor [M+2]	1271518592
MS1_K9R17_K9me1_K14ac	KSTGGKAPR	501.7921++	H3_9-17	Ref2007_AS_25_181219	1	37.5895	143360100	precursor [M+2]	1180724480
MS1_K9R17_K9me1_K14ac	KSTGGKAPR	501.7921++	H3_9-17	Ref2007_AS_26_181219	1	37.3885	162487100	precursor [M+2]	1367804160
MS1_K9R17_K9me1_K14ac	KSTGGKAPR	501.7921++	H3_9-17	Ref2007_AS_27_181219	1	37.469	198271900	precursor [M+2]	1687521024
MS1_K9R17_K9me1_K14ac	KSTGGKAPR	501.7921++	H3_9-17	Ref2007_AS_28_181219	1	36.7856	89142830	precursor [M+2]	762567040
MS1_K9R17_K9me1_K14ac	KSTGGKAPR	501.7921++	H3_9-17	Ref2007_AS_29_181219	1	36.5243	216893000	precursor [M+2]	1877674240
MS1_K9R17_K9me1_K14ac	KSTGGKAPR	501.7921++	H3_9-17	Ref2007_AS_30_181219	1	37.2277	181529600	precursor [M+2]	1528044032
MS1_K9R17_K9me1_K14ac	KSTGGKAPR	501.7921++	H3_9-17	Ref2007_AS_31_181219	1	37.4086	130933200	precursor [M+2]	1108173056
MS1_K9R17_K9me1_K14ac	KSTGGKAPR	501.7921++	H3_9-17	Ref2007_AS_32_181219	1	37.3483	98895230	precursor [M+2]	846644992
MS1_K9R17_K9me1_K14ac	KSTGGKAPR	501.7921++	H3_9-17	Ref2007_AS_33_181219	1	37.6498	131113000	precursor [M+2]	1093183232
MS1_K9R17_K9me1_K14ac	KSTGGKAPR	501.7921++	H3_9-17	Ref2007_AS_34_181219	1	36.5242	98809460	precursor [M+2]	849566720
MS1_K9R17_K9me1_K14ac	KSTGGKAPR	501.7921++	H3_9-17	Ref2007_AS_35_181219	1	37.2277	136601700	precursor [M+2]	1149370368
MS1_K9R17_K9me1_K14ac	KSTGGKAPR	501.7921++	H3_9-17	Ref2007_AS_QC0_181219	1	38.0719	99666850	precursor [M+2]	865150208
MS1_K9R17_K9me1_K14ac	KSTGGKAPR	501.7921++	H3_9-17	Ref2007_AS_QC1_181219	1	37.6297	82332420	precursor [M+2]	718486528
MS1_K9R17_K9me1_K14ac	KSTGGKAPR	501.7921++	H3_9-17	Ref2007_AS_QC2_181219	1	37.1674	84719300	precursor [M+2]	739202112
MS1_K9R17_K9me1_K14ac	KSTGGKAPR	501.7921++	H3_9-17	Ref2007_AS_QC3_181219	1	37.5091	101012100	precursor [M+2]	878138176
MS1_K9R17_K9me1_K14ac	KSTGGKAPR	501.7921++	H3_9-17	Ref2007_AS_QC4_181219	1	36.7252	72713860	precursor [M+2]	623625088
MS1_K9R17_K9me1_K14ac	KSTGGKAPR	501.7921++	H3_9-17	Ref2007_AS_QC5_181219	1	36.7253	69715330	precursor [M+2]	600200576
MS1_K9R17_K9me2	KSTGGKAPR	487.7947++	H3_9-17	blank_00	1	60.1016	2251860	precursor	3.43915e+06
MS1_K9R17_K9me2	KSTGGKAPR	487.7947++	H3_9-17	blank_01	1	19.9216	693334	precursor	1.07209e+06
MS1_K9R17_K9me2	KSTGGKAPR	487.7947++	H3_9-17	Ref2007_AS_01_181219	1	19.781	1996757000	precursor	3313290496
MS1_K9R17_K9me2	KSTGGKAPR	487.7947++	H3_9-17	Ref2007_AS_02_181219	1	19.7608	1485809000	precursor	2477452544
MS1_K9R17_K9me2	KSTGGKAPR	487.7947++	H3_9-17	Ref2007_AS_03_181219	1	19.6603	819548500	precursor	1365224960
MS1_K9R17_K9me2	KSTGGKAPR	487.7947++	H3_9-17	Ref2007_AS_04_181219	1	19.7408	965629700	precursor	1594764288
MS1_K9R17_K9me2	KSTGGKAPR	487.7947++	H3_9-17	Ref2007_AS_05_181219	1	19.7608	1585065000	precursor	2620023552
MS1_K9R17_K9me2	KSTGGKAPR	487.7947++	H3_9-17	Ref2007_AS_06_181219	1	19.7005	979959000	precursor	1619785472
MS1_K9R17_K9me2	KSTGGKAPR	487.7947++	H3_9-17	Ref2007_AS_07_181219	1	19.7005	1252099000	precursor	2067590656
MS1_K9R17_K9me2	KSTGGKAPR	487.7947++	H3_9-17	Ref2007_AS_08_181219	1	19.781	2455188000	precursor	4062978304
MS1_K9R17_K9me2	KSTGGKAPR	487.7947++	H3_9-17	Ref2007_AS_09_181219	1	19.7207	1183170000	precursor	1954862336
MS1_K9R17_K9me2	KSTGGKAPR	487.7947++	H3_9-17	Ref2007_AS_10_181219	1	19.7407	2060765000	precursor	3422754304
MS1_K9R17_K9me2	KSTGGKAPR	487.7947++	H3_9-17	Ref2007_AS_11_181219	1	19.6603	970223800	precursor	1625624960
MS1_K9R17_K9me2	KSTGGKAPR	487.7947++	H3_9-17	Ref2007_AS_12_181219	1	19.781	1691497000	precursor	2807227136
MS1_K9R17_K9me2	KSTGGKAPR	487.7947++	H3_9-17	Ref2007_AS_13_181219	1	19.7207	1640336000	precursor	2702699008
MS1_K9R17_K9me2	KSTGGKAPR	487.7947++	H3_9-17	Ref2007_AS_14_181219	1	19.7407	1764297000	precursor	2906732032
MS1_K9R17_K9me2	KSTGGKAPR	487.7947++	H3_9-17	Ref2007_AS_15_181219	1	19.7206	1627245000	precursor	2689620736
MS1_K9R17_K9me2	KSTGGKAPR	487.7947++	H3_9-17	Ref2007_AS_16_181219	1	19.7609	1653225000	precursor	2733123328
MS1_K9R17_K9me2	KSTGGKAPR	487.7947++	H3_9-17	Ref2007_AS_17_181219	1	19.7609	1460385000	precursor	2391998208
MS1_K9R17_K9me2	KSTGGKAPR	487.7947++	H3_9-17	Ref2007_AS_18_181219	1	19.7207	1104616000	precursor	1824014336
MS1_K9R17_K9me2	KSTGGKAPR	487.7947++	H3_9-17	Ref2007_AS_19_181219	1	19.6804	759545700	precursor	1247550848
MS1_K9R17_K9me2	KSTGGKAPR	487.7947++	H3_9-17	Ref2007_AS_20_181219	1	19.7408	1684423000	precursor	2760248832
MS1_K9R17_K9me2	KSTGGKAPR	487.7947++	H3_9-17	Ref2007_AS_21_181219	1	19.7006	1084766000	precursor	1788588672
MS1_K9R17_K9me2	KSTGGKAPR	487.7947++	H3_9-17	Ref2007_AS_22_181219	1	19.7408	1047583000	precursor	1742835968
MS1_K9R17_K9me2	KSTGGKAPR	487.7947++	H3_9-17	Ref2007_AS_23_181219	1	20.1903	2408274000	precursor	3987703808
MS1_K9R17_K9me2	KSTGGKAPR	487.7947++	H3_9-17	Ref2007_AS_24_181219	1	19.7407	2164429000	precursor	3576991744
MS1_K9R17_K9me2	KSTGGKAPR	487.7947++	H3_9-17	Ref2007_AS_25_181219	1	19.7809	2042816000	precursor	3363501824
MS1_K9R17_K9me2	KSTGGKAPR	487.7947++	H3_9-17	Ref2007_AS_26_181219	1	19.7407	2254723000	precursor	3716582912
MS1_K9R17_K9me2	KSTGGKAPR	487.7947++	H3_9-17	Ref2007_AS_27_181219	1	19.7609	2318262000	precursor	3821225984
MS1_K9R17_K9me2	KSTGGKAPR	487.7947++	H3_9-17	Ref2007_AS_28_181219	1	19.6805	1622853000	precursor	2678283520
MS1_K9R17_K9me2	KSTGGKAPR	487.7947++	H3_9-17	Ref2007_AS_29_181219	1	19.6805	2019900000	precursor	3331478528
MS1_K9R17_K9me2	KSTGGKAPR	487.7947++	H3_9-17	Ref2007_AS_30_181219	1	19.7206	2434711000	precursor	4043382272
MS1_K9R17_K9me2	KSTGGKAPR	487.7947++	H3_9-17	Ref2007_AS_31_181219	1	19.7809	1558602000	precursor	2588860160
MS1_K9R17_K9me2	KSTGGKAPR	487.7947++	H3_9-17	Ref2007_AS_32_181219	1	19.7206	1205358000	precursor	2005112192
MS1_K9R17_K9me2	KSTGGKAPR	487.7947++	H3_9-17	Ref2007_AS_33_181219	1	19.7809	1545993000	precursor	2530114816
MS1_K9R17_K9me2	KSTGGKAPR	487.7947++	H3_9-17	Ref2007_AS_34_181219	1	19.6804	1053042000	precursor	1742171904
MS1_K9R17_K9me2	KSTGGKAPR	487.7947++	H3_9-17	Ref2007_AS_35_181219	1	19.7608	1951599000	precursor	3229114368
MS1_K9R17_K9me2	KSTGGKAPR	487.7947++	H3_9-17	Ref2007_AS_QC0_181219	1	19.8412	1145677000	precursor	1904187776
MS1_K9R17_K9me2	KSTGGKAPR	487.7947++	H3_9-17	Ref2007_AS_QC1_181219	1	19.7608	1034526000	precursor	1711561216
MS1_K9R17_K9me2	KSTGGKAPR	487.7947++	H3_9-17	Ref2007_AS_QC2_181219	1	19.6804	1599056000	precursor	2643310592
MS1_K9R17_K9me2	KSTGGKAPR	487.7947++	H3_9-17	Ref2007_AS_QC3_181219	1	19.7206	1547258000	precursor	2550883584
MS1_K9R17_K9me2	KSTGGKAPR	487.7947++	H3_9-17	Ref2007_AS_QC4_181219	1	19.6603	1023134000	precursor	1704679040
MS1_K9R17_K9me2	KSTGGKAPR	487.7947++	H3_9-17	Ref2007_AS_QC5_181219	1	19.6604	759750200	precursor	1257576576
MS1_K9R17_K9me2	KSTGGKAPR	487.7947++	H3_9-17	blank_00	1	60.1016	1172875	precursor [M+1]	3.43915e+06
MS1_K9R17_K9me2	KSTGGKAPR	487.7947++	H3_9-17	blank_01	1	19.9216	355958	precursor [M+1]	1.07209e+06
MS1_K9R17_K9me2	KSTGGKAPR	487.7947++	H3_9-17	Ref2007_AS_01_181219	1	19.781	1008380000	precursor [M+1]	3313290496
MS1_K9R17_K9me2	KSTGGKAPR	487.7947++	H3_9-17	Ref2007_AS_02_181219	1	19.7608	758940700	precursor [M+1]	2477452544
MS1_K9R17_K9me2	KSTGGKAPR	487.7947++	H3_9-17	Ref2007_AS_03_181219	1	19.6603	417072000	precursor [M+1]	1365224960
MS1_K9R17_K9me2	KSTGGKAPR	487.7947++	H3_9-17	Ref2007_AS_04_181219	1	19.7408	479720600	precursor [M+1]	1594764288
MS1_K9R17_K9me2	KSTGGKAPR	487.7947++	H3_9-17	Ref2007_AS_05_181219	1	19.7608	793001500	precursor [M+1]	2620023552
MS1_K9R17_K9me2	KSTGGKAPR	487.7947++	H3_9-17	Ref2007_AS_06_181219	1	19.7005	491153000	precursor [M+1]	1619785472
MS1_K9R17_K9me2	KSTGGKAPR	487.7947++	H3_9-17	Ref2007_AS_07_181219	1	19.7005	627683000	precursor [M+1]	2067590656
MS1_K9R17_K9me2	KSTGGKAPR	487.7947++	H3_9-17	Ref2007_AS_08_181219	1	19.781	1225348000	precursor [M+1]	4062978304
MS1_K9R17_K9me2	KSTGGKAPR	487.7947++	H3_9-17	Ref2007_AS_09_181219	1	19.7207	593474600	precursor [M+1]	1954862336
MS1_K9R17_K9me2	KSTGGKAPR	487.7947++	H3_9-17	Ref2007_AS_10_181219	1	19.7407	1043797000	precursor [M+1]	3422754304
MS1_K9R17_K9me2	KSTGGKAPR	487.7947++	H3_9-17	Ref2007_AS_11_181219	1	19.6603	504906900	precursor [M+1]	1625624960
MS1_K9R17_K9me2	KSTGGKAPR	487.7947++	H3_9-17	Ref2007_AS_12_181219	1	19.781	854275900	precursor [M+1]	2807227136
MS1_K9R17_K9me2	KSTGGKAPR	487.7947++	H3_9-17	Ref2007_AS_13_181219	1	19.7207	812919700	precursor [M+1]	2702699008
MS1_K9R17_K9me2	KSTGGKAPR	487.7947++	H3_9-17	Ref2007_AS_14_181219	1	19.7407	873118000	precursor [M+1]	2906732032
MS1_K9R17_K9me2	KSTGGKAPR	487.7947++	H3_9-17	Ref2007_AS_15_181219	1	19.7206	814855500	precursor [M+1]	2689620736
MS1_K9R17_K9me2	KSTGGKAPR	487.7947++	H3_9-17	Ref2007_AS_16_181219	1	19.7609	828951200	precursor [M+1]	2733123328
MS1_K9R17_K9me2	KSTGGKAPR	487.7947++	H3_9-17	Ref2007_AS_17_181219	1	19.7609	710345900	precursor [M+1]	2391998208
MS1_K9R17_K9me2	KSTGGKAPR	487.7947++	H3_9-17	Ref2007_AS_18_181219	1	19.7207	549546600	precursor [M+1]	1824014336
MS1_K9R17_K9me2	KSTGGKAPR	487.7947++	H3_9-17	Ref2007_AS_19_181219	1	19.6804	374392700	precursor [M+1]	1247550848
MS1_K9R17_K9me2	KSTGGKAPR	487.7947++	H3_9-17	Ref2007_AS_20_181219	1	19.7408	823871200	precursor [M+1]	2760248832
MS1_K9R17_K9me2	KSTGGKAPR	487.7947++	H3_9-17	Ref2007_AS_21_181219	1	19.7006	537895200	precursor [M+1]	1788588672
MS1_K9R17_K9me2	KSTGGKAPR	487.7947++	H3_9-17	Ref2007_AS_22_181219	1	19.7408	535795200	precursor [M+1]	1742835968
MS1_K9R17_K9me2	KSTGGKAPR	487.7947++	H3_9-17	Ref2007_AS_23_181219	1	20.1903	1209601000	precursor [M+1]	3987703808
MS1_K9R17_K9me2	KSTGGKAPR	487.7947++	H3_9-17	Ref2007_AS_24_181219	1	19.7407	1077535000	precursor [M+1]	3576991744
MS1_K9R17_K9me2	KSTGGKAPR	487.7947++	H3_9-17	Ref2007_AS_25_181219	1	19.7809	1007432000	precursor [M+1]	3363501824
MS1_K9R17_K9me2	KSTGGKAPR	487.7947++	H3_9-17	Ref2007_AS_26_181219	1	19.7407	1122419000	precursor [M+1]	3716582912
MS1_K9R17_K9me2	KSTGGKAPR	487.7947++	H3_9-17	Ref2007_AS_27_181219	1	19.7609	1145180000	precursor [M+1]	3821225984
MS1_K9R17_K9me2	KSTGGKAPR	487.7947++	H3_9-17	Ref2007_AS_28_181219	1	19.6805	808979000	precursor [M+1]	2678283520
MS1_K9R17_K9me2	KSTGGKAPR	487.7947++	H3_9-17	Ref2007_AS_29_181219	1	19.6805	999392400	precursor [M+1]	3331478528
MS1_K9R17_K9me2	KSTGGKAPR	487.7947++	H3_9-17	Ref2007_AS_30_181219	1	19.7206	1228652000	precursor [M+1]	4043382272
MS1_K9R17_K9me2	KSTGGKAPR	487.7947++	H3_9-17	Ref2007_AS_31_181219	1	19.7809	788797200	precursor [M+1]	2588860160
MS1_K9R17_K9me2	KSTGGKAPR	487.7947++	H3_9-17	Ref2007_AS_32_181219	1	19.7206	614560300	precursor [M+1]	2005112192
MS1_K9R17_K9me2	KSTGGKAPR	487.7947++	H3_9-17	Ref2007_AS_33_181219	1	19.7809	753396000	precursor [M+1]	2530114816
MS1_K9R17_K9me2	KSTGGKAPR	487.7947++	H3_9-17	Ref2007_AS_34_181219	1	19.6804	529799000	precursor [M+1]	1742171904
MS1_K9R17_K9me2	KSTGGKAPR	487.7947++	H3_9-17	Ref2007_AS_35_181219	1	19.7608	980256800	precursor [M+1]	3229114368
MS1_K9R17_K9me2	KSTGGKAPR	487.7947++	H3_9-17	Ref2007_AS_QC0_181219	1	19.8412	576740100	precursor [M+1]	1904187776
MS1_K9R17_K9me2	KSTGGKAPR	487.7947++	H3_9-17	Ref2007_AS_QC1_181219	1	19.7608	516848500	precursor [M+1]	1711561216
MS1_K9R17_K9me2	KSTGGKAPR	487.7947++	H3_9-17	Ref2007_AS_QC2_181219	1	19.6804	804308700	precursor [M+1]	2643310592
MS1_K9R17_K9me2	KSTGGKAPR	487.7947++	H3_9-17	Ref2007_AS_QC3_181219	1	19.7206	769060800	precursor [M+1]	2550883584
MS1_K9R17_K9me2	KSTGGKAPR	487.7947++	H3_9-17	Ref2007_AS_QC4_181219	1	19.6603	521782500	precursor [M+1]	1704679040
MS1_K9R17_K9me2	KSTGGKAPR	487.7947++	H3_9-17	Ref2007_AS_QC5_181219	1	19.6604	382508300	precursor [M+1]	1257576576
MS1_K9R17_K9me2	KSTGGKAPR	487.7947++	H3_9-17	blank_00	1	60.1016	14419	precursor [M+2]	3.43915e+06
MS1_K9R17_K9me2	KSTGGKAPR	487.7947++	H3_9-17	blank_01	1	19.9216	22797	precursor [M+2]	1.07209e+06
MS1_K9R17_K9me2	KSTGGKAPR	487.7947++	H3_9-17	Ref2007_AS_01_181219	1	19.781	308153800	precursor [M+2]	3313290496
MS1_K9R17_K9me2	KSTGGKAPR	487.7947++	H3_9-17	Ref2007_AS_02_181219	1	19.7608	232702400	precursor [M+2]	2477452544
MS1_K9R17_K9me2	KSTGGKAPR	487.7947++	H3_9-17	Ref2007_AS_03_181219	1	19.6603	128604400	precursor [M+2]	1365224960
MS1_K9R17_K9me2	KSTGGKAPR	487.7947++	H3_9-17	Ref2007_AS_04_181219	1	19.7408	149414000	precursor [M+2]	1594764288
MS1_K9R17_K9me2	KSTGGKAPR	487.7947++	H3_9-17	Ref2007_AS_05_181219	1	19.7608	241957400	precursor [M+2]	2620023552
MS1_K9R17_K9me2	KSTGGKAPR	487.7947++	H3_9-17	Ref2007_AS_06_181219	1	19.7005	148673400	precursor [M+2]	1619785472
MS1_K9R17_K9me2	KSTGGKAPR	487.7947++	H3_9-17	Ref2007_AS_07_181219	1	19.7005	187808300	precursor [M+2]	2067590656
MS1_K9R17_K9me2	KSTGGKAPR	487.7947++	H3_9-17	Ref2007_AS_08_181219	1	19.781	382442200	precursor [M+2]	4062978304
MS1_K9R17_K9me2	KSTGGKAPR	487.7947++	H3_9-17	Ref2007_AS_09_181219	1	19.7207	178218200	precursor [M+2]	1954862336
MS1_K9R17_K9me2	KSTGGKAPR	487.7947++	H3_9-17	Ref2007_AS_10_181219	1	19.7407	318192000	precursor [M+2]	3422754304
MS1_K9R17_K9me2	KSTGGKAPR	487.7947++	H3_9-17	Ref2007_AS_11_181219	1	19.6603	150494200	precursor [M+2]	1625624960
MS1_K9R17_K9me2	KSTGGKAPR	487.7947++	H3_9-17	Ref2007_AS_12_181219	1	19.781	261453800	precursor [M+2]	2807227136
MS1_K9R17_K9me2	KSTGGKAPR	487.7947++	H3_9-17	Ref2007_AS_13_181219	1	19.7207	249443200	precursor [M+2]	2702699008
MS1_K9R17_K9me2	KSTGGKAPR	487.7947++	H3_9-17	Ref2007_AS_14_181219	1	19.7407	269316900	precursor [M+2]	2906732032
MS1_K9R17_K9me2	KSTGGKAPR	487.7947++	H3_9-17	Ref2007_AS_15_181219	1	19.7206	247519900	precursor [M+2]	2689620736
MS1_K9R17_K9me2	KSTGGKAPR	487.7947++	H3_9-17	Ref2007_AS_16_181219	1	19.7609	250947300	precursor [M+2]	2733123328
MS1_K9R17_K9me2	KSTGGKAPR	487.7947++	H3_9-17	Ref2007_AS_17_181219	1	19.7609	221267400	precursor [M+2]	2391998208
MS1_K9R17_K9me2	KSTGGKAPR	487.7947++	H3_9-17	Ref2007_AS_18_181219	1	19.7207	169851700	precursor [M+2]	1824014336
MS1_K9R17_K9me2	KSTGGKAPR	487.7947++	H3_9-17	Ref2007_AS_19_181219	1	19.6804	113612400	precursor [M+2]	1247550848
MS1_K9R17_K9me2	KSTGGKAPR	487.7947++	H3_9-17	Ref2007_AS_20_181219	1	19.7408	251954700	precursor [M+2]	2760248832
MS1_K9R17_K9me2	KSTGGKAPR	487.7947++	H3_9-17	Ref2007_AS_21_181219	1	19.7006	165927400	precursor [M+2]	1788588672
MS1_K9R17_K9me2	KSTGGKAPR	487.7947++	H3_9-17	Ref2007_AS_22_181219	1	19.7408	159458100	precursor [M+2]	1742835968
MS1_K9R17_K9me2	KSTGGKAPR	487.7947++	H3_9-17	Ref2007_AS_23_181219	1	20.1903	369828400	precursor [M+2]	3987703808
MS1_K9R17_K9me2	KSTGGKAPR	487.7947++	H3_9-17	Ref2007_AS_24_181219	1	19.7407	335027200	precursor [M+2]	3576991744
MS1_K9R17_K9me2	KSTGGKAPR	487.7947++	H3_9-17	Ref2007_AS_25_181219	1	19.7809	313253600	precursor [M+2]	3363501824
MS1_K9R17_K9me2	KSTGGKAPR	487.7947++	H3_9-17	Ref2007_AS_26_181219	1	19.7407	339440500	precursor [M+2]	3716582912
MS1_K9R17_K9me2	KSTGGKAPR	487.7947++	H3_9-17	Ref2007_AS_27_181219	1	19.7609	357784100	precursor [M+2]	3821225984
MS1_K9R17_K9me2	KSTGGKAPR	487.7947++	H3_9-17	Ref2007_AS_28_181219	1	19.6805	246451600	precursor [M+2]	2678283520
MS1_K9R17_K9me2	KSTGGKAPR	487.7947++	H3_9-17	Ref2007_AS_29_181219	1	19.6805	312186300	precursor [M+2]	3331478528
MS1_K9R17_K9me2	KSTGGKAPR	487.7947++	H3_9-17	Ref2007_AS_30_181219	1	19.7206	380019700	precursor [M+2]	4043382272
MS1_K9R17_K9me2	KSTGGKAPR	487.7947++	H3_9-17	Ref2007_AS_31_181219	1	19.7809	241460900	precursor [M+2]	2588860160
MS1_K9R17_K9me2	KSTGGKAPR	487.7947++	H3_9-17	Ref2007_AS_32_181219	1	19.7206	185194100	precursor [M+2]	2005112192
MS1_K9R17_K9me2	KSTGGKAPR	487.7947++	H3_9-17	Ref2007_AS_33_181219	1	19.7809	230725400	precursor [M+2]	2530114816
MS1_K9R17_K9me2	KSTGGKAPR	487.7947++	H3_9-17	Ref2007_AS_34_181219	1	19.6804	159330900	precursor [M+2]	1742171904
MS1_K9R17_K9me2	KSTGGKAPR	487.7947++	H3_9-17	Ref2007_AS_35_181219	1	19.7608	297257900	precursor [M+2]	3229114368
MS1_K9R17_K9me2	KSTGGKAPR	487.7947++	H3_9-17	Ref2007_AS_QC0_181219	1	19.8412	181770800	precursor [M+2]	1904187776
MS1_K9R17_K9me2	KSTGGKAPR	487.7947++	H3_9-17	Ref2007_AS_QC1_181219	1	19.7608	160186800	precursor [M+2]	1711561216
MS1_K9R17_K9me2	KSTGGKAPR	487.7947++	H3_9-17	Ref2007_AS_QC2_181219	1	19.6804	239945500	precursor [M+2]	2643310592
MS1_K9R17_K9me2	KSTGGKAPR	487.7947++	H3_9-17	Ref2007_AS_QC3_181219	1	19.7206	234564300	precursor [M+2]	2550883584
MS1_K9R17_K9me2	KSTGGKAPR	487.7947++	H3_9-17	Ref2007_AS_QC4_181219	1	19.6603	159763000	precursor [M+2]	1704679040
MS1_K9R17_K9me2	KSTGGKAPR	487.7947++	H3_9-17	Ref2007_AS_QC5_181219	1	19.6604	115318100	precursor [M+2]	1257576576
MS1_K9R17_K9me2_K14ac	KSTGGKAPR	486.2853++	H3_9-17	blank_00	0.666667	48.2819	388317	precursor	391861
MS1_K9R17_K9me2_K14ac	KSTGGKAPR	486.2853++	H3_9-17	blank_01	0.666667	47.7199	391242	precursor	401310
MS1_K9R17_K9me2_K14ac	KSTGGKAPR	486.2853++	H3_9-17	Ref2007_AS_01_181219	1	19.8011	306821100	precursor	536252800
MS1_K9R17_K9me2_K14ac	KSTGGKAPR	486.2853++	H3_9-17	Ref2007_AS_02_181219	1	19.7809	187119500	precursor	343869440
MS1_K9R17_K9me2_K14ac	KSTGGKAPR	486.2853++	H3_9-17	Ref2007_AS_03_181219	1	19.6804	137002100	precursor	237175088
MS1_K9R17_K9me2_K14ac	KSTGGKAPR	486.2853++	H3_9-17	Ref2007_AS_04_181219	1	19.7609	222830000	precursor	369998784
MS1_K9R17_K9me2_K14ac	KSTGGKAPR	486.2853++	H3_9-17	Ref2007_AS_05_181219	1	19.7809	332882300	precursor	548720960
MS1_K9R17_K9me2_K14ac	KSTGGKAPR	486.2853++	H3_9-17	Ref2007_AS_06_181219	1	19.7206	190336500	precursor	313894656
MS1_K9R17_K9me2_K14ac	KSTGGKAPR	486.2853++	H3_9-17	Ref2007_AS_07_181219	1	19.7206	175290200	precursor	310846880
MS1_K9R17_K9me2_K14ac	KSTGGKAPR	486.2853++	H3_9-17	Ref2007_AS_08_181219	1	19.8011	369285100	precursor	658222144
MS1_K9R17_K9me2_K14ac	KSTGGKAPR	486.2853++	H3_9-17	Ref2007_AS_09_181219	1	19.7207	205662500	precursor	349043936
MS1_K9R17_K9me2_K14ac	KSTGGKAPR	486.2853++	H3_9-17	Ref2007_AS_10_181219	1	19.7407	289842000	precursor	503249152
MS1_K9R17_K9me2_K14ac	KSTGGKAPR	486.2853++	H3_9-17	Ref2007_AS_11_181219	1	19.6603	133474300	precursor	236040752
MS1_K9R17_K9me2_K14ac	KSTGGKAPR	486.2853++	H3_9-17	Ref2007_AS_12_181219	1	19.781	269560200	precursor	460905024
MS1_K9R17_K9me2_K14ac	KSTGGKAPR	486.2853++	H3_9-17	Ref2007_AS_13_181219	1	19.7207	227548700	precursor	395774976
MS1_K9R17_K9me2_K14ac	KSTGGKAPR	486.2853++	H3_9-17	Ref2007_AS_14_181219	1	19.7608	375842700	precursor	651281536
MS1_K9R17_K9me2_K14ac	KSTGGKAPR	486.2853++	H3_9-17	Ref2007_AS_15_181219	1	19.7608	332027700	precursor	553784512
MS1_K9R17_K9me2_K14ac	KSTGGKAPR	486.2853++	H3_9-17	Ref2007_AS_16_181219	1	19.8011	297271400	precursor	517997184
MS1_K9R17_K9me2_K14ac	KSTGGKAPR	486.2853++	H3_9-17	Ref2007_AS_17_181219	1	19.781	289097100	precursor	485128320
MS1_K9R17_K9me2_K14ac	KSTGGKAPR	486.2853++	H3_9-17	Ref2007_AS_18_181219	1	19.7408	233311400	precursor	386264576
MS1_K9R17_K9me2_K14ac	KSTGGKAPR	486.2853++	H3_9-17	Ref2007_AS_19_181219	1	19.7005	108448500	precursor	191353856
MS1_K9R17_K9me2_K14ac	KSTGGKAPR	486.2853++	H3_9-17	Ref2007_AS_20_181219	1	19.7408	257649100	precursor	452087392
MS1_K9R17_K9me2_K14ac	KSTGGKAPR	486.2853++	H3_9-17	Ref2007_AS_21_181219	1	19.7207	170271100	precursor	296279040
MS1_K9R17_K9me2_K14ac	KSTGGKAPR	486.2853++	H3_9-17	Ref2007_AS_22_181219	1	19.7408	156138200	precursor	265311936
MS1_K9R17_K9me2_K14ac	KSTGGKAPR	486.2853++	H3_9-17	Ref2007_AS_23_181219	1	20.2096	394122600	precursor	667428160
MS1_K9R17_K9me2_K14ac	KSTGGKAPR	486.2853++	H3_9-17	Ref2007_AS_24_181219	1	19.7407	294098000	precursor	518444544
MS1_K9R17_K9me2_K14ac	KSTGGKAPR	486.2853++	H3_9-17	Ref2007_AS_25_181219	1	19.7809	289611500	precursor	489740992
MS1_K9R17_K9me2_K14ac	KSTGGKAPR	486.2853++	H3_9-17	Ref2007_AS_26_181219	1	19.7608	313082900	precursor	545525888
MS1_K9R17_K9me2_K14ac	KSTGGKAPR	486.2853++	H3_9-17	Ref2007_AS_27_181219	1	19.7609	340481500	precursor	582795392
MS1_K9R17_K9me2_K14ac	KSTGGKAPR	486.2853++	H3_9-17	Ref2007_AS_28_181219	1	19.7006	228131800	precursor	394147232
MS1_K9R17_K9me2_K14ac	KSTGGKAPR	486.2853++	H3_9-17	Ref2007_AS_29_181219	1	19.7006	330191700	precursor	565339328
MS1_K9R17_K9me2_K14ac	KSTGGKAPR	486.2853++	H3_9-17	Ref2007_AS_30_181219	1	19.7407	326505500	precursor	560684864
MS1_K9R17_K9me2_K14ac	KSTGGKAPR	486.2853++	H3_9-17	Ref2007_AS_31_181219	1	19.7809	227593300	precursor	384839168
MS1_K9R17_K9me2_K14ac	KSTGGKAPR	486.2853++	H3_9-17	Ref2007_AS_32_181219	1	19.7407	194552300	precursor	325702176
MS1_K9R17_K9me2_K14ac	KSTGGKAPR	486.2853++	H3_9-17	Ref2007_AS_33_181219	1	19.801	225049800	precursor	385728992
MS1_K9R17_K9me2_K14ac	KSTGGKAPR	486.2853++	H3_9-17	Ref2007_AS_34_181219	1	19.6804	155644300	precursor	259393296
MS1_K9R17_K9me2_K14ac	KSTGGKAPR	486.2853++	H3_9-17	Ref2007_AS_35_181219	1	19.7608	259333400	precursor	456063456
MS1_K9R17_K9me2_K14ac	KSTGGKAPR	486.2853++	H3_9-17	Ref2007_AS_QC0_181219	1	19.8412	171189800	precursor	308912224
MS1_K9R17_K9me2_K14ac	KSTGGKAPR	486.2853++	H3_9-17	Ref2007_AS_QC1_181219	1	19.801	157805500	precursor	282978272
MS1_K9R17_K9me2_K14ac	KSTGGKAPR	486.2853++	H3_9-17	Ref2007_AS_QC2_181219	1	19.6804	201310900	precursor	356068224
MS1_K9R17_K9me2_K14ac	KSTGGKAPR	486.2853++	H3_9-17	Ref2007_AS_QC3_181219	1	19.7206	200995800	precursor	363587520
MS1_K9R17_K9me2_K14ac	KSTGGKAPR	486.2853++	H3_9-17	Ref2007_AS_QC4_181219	1	19.4995	37800410	precursor	47921376
MS1_K9R17_K9me2_K14ac	KSTGGKAPR	486.2853++	H3_9-17	Ref2007_AS_QC5_181219	1	19.6805	109858700	precursor	197645408
MS1_K9R17_K9me2_K14ac	KSTGGKAPR	486.2853++	H3_9-17	blank_00	0.666667	48.2819	0	precursor [M+1]	391861
MS1_K9R17_K9me2_K14ac	KSTGGKAPR	486.2853++	H3_9-17	blank_01	0.666667	47.7199	10069	precursor [M+1]	401310
MS1_K9R17_K9me2_K14ac	KSTGGKAPR	486.2853++	H3_9-17	Ref2007_AS_01_181219	1	19.8011	155168200	precursor [M+1]	536252800
MS1_K9R17_K9me2_K14ac	KSTGGKAPR	486.2853++	H3_9-17	Ref2007_AS_02_181219	1	19.7809	99452090	precursor [M+1]	343869440
MS1_K9R17_K9me2_K14ac	KSTGGKAPR	486.2853++	H3_9-17	Ref2007_AS_03_181219	1	19.6804	70309130	precursor [M+1]	237175088
MS1_K9R17_K9me2_K14ac	KSTGGKAPR	486.2853++	H3_9-17	Ref2007_AS_04_181219	1	19.7609	91952490	precursor [M+1]	369998784
MS1_K9R17_K9me2_K14ac	KSTGGKAPR	486.2853++	H3_9-17	Ref2007_AS_05_181219	1	19.7809	135787200	precursor [M+1]	548720960
MS1_K9R17_K9me2_K14ac	KSTGGKAPR	486.2853++	H3_9-17	Ref2007_AS_06_181219	1	19.7206	78450780	precursor [M+1]	313894656
MS1_K9R17_K9me2_K14ac	KSTGGKAPR	486.2853++	H3_9-17	Ref2007_AS_07_181219	1	19.7206	92245370	precursor [M+1]	310846880
MS1_K9R17_K9me2_K14ac	KSTGGKAPR	486.2853++	H3_9-17	Ref2007_AS_08_181219	1	19.8011	199541900	precursor [M+1]	658222144
MS1_K9R17_K9me2_K14ac	KSTGGKAPR	486.2853++	H3_9-17	Ref2007_AS_09_181219	1	19.7207	98483980	precursor [M+1]	349043936
MS1_K9R17_K9me2_K14ac	KSTGGKAPR	486.2853++	H3_9-17	Ref2007_AS_10_181219	1	19.7407	143415900	precursor [M+1]	503249152
MS1_K9R17_K9me2_K14ac	KSTGGKAPR	486.2853++	H3_9-17	Ref2007_AS_11_181219	1	19.6603	65609540	precursor [M+1]	236040752
MS1_K9R17_K9me2_K14ac	KSTGGKAPR	486.2853++	H3_9-17	Ref2007_AS_12_181219	1	19.781	127064500	precursor [M+1]	460905024
MS1_K9R17_K9me2_K14ac	KSTGGKAPR	486.2853++	H3_9-17	Ref2007_AS_13_181219	1	19.7207	116704700	precursor [M+1]	395774976
MS1_K9R17_K9me2_K14ac	KSTGGKAPR	486.2853++	H3_9-17	Ref2007_AS_14_181219	1	19.7608	197145400	precursor [M+1]	651281536
MS1_K9R17_K9me2_K14ac	KSTGGKAPR	486.2853++	H3_9-17	Ref2007_AS_15_181219	1	19.7608	142624400	precursor [M+1]	553784512
MS1_K9R17_K9me2_K14ac	KSTGGKAPR	486.2853++	H3_9-17	Ref2007_AS_16_181219	1	19.8011	156550400	precursor [M+1]	517997184
MS1_K9R17_K9me2_K14ac	KSTGGKAPR	486.2853++	H3_9-17	Ref2007_AS_17_181219	1	19.781	125623100	precursor [M+1]	485128320
MS1_K9R17_K9me2_K14ac	KSTGGKAPR	486.2853++	H3_9-17	Ref2007_AS_18_181219	1	19.7408	102828800	precursor [M+1]	386264576
MS1_K9R17_K9me2_K14ac	KSTGGKAPR	486.2853++	H3_9-17	Ref2007_AS_19_181219	1	19.7005	57516870	precursor [M+1]	191353856
MS1_K9R17_K9me2_K14ac	KSTGGKAPR	486.2853++	H3_9-17	Ref2007_AS_20_181219	1	19.7408	134041000	precursor [M+1]	452087392
MS1_K9R17_K9me2_K14ac	KSTGGKAPR	486.2853++	H3_9-17	Ref2007_AS_21_181219	1	19.7207	83952740	precursor [M+1]	296279040
MS1_K9R17_K9me2_K14ac	KSTGGKAPR	486.2853++	H3_9-17	Ref2007_AS_22_181219	1	19.7408	74310050	precursor [M+1]	265311936
MS1_K9R17_K9me2_K14ac	KSTGGKAPR	486.2853++	H3_9-17	Ref2007_AS_23_181219	1	20.2096	181086900	precursor [M+1]	667428160
MS1_K9R17_K9me2_K14ac	KSTGGKAPR	486.2853++	H3_9-17	Ref2007_AS_24_181219	1	19.7407	146620800	precursor [M+1]	518444544
MS1_K9R17_K9me2_K14ac	KSTGGKAPR	486.2853++	H3_9-17	Ref2007_AS_25_181219	1	19.7809	126704200	precursor [M+1]	489740992
MS1_K9R17_K9me2_K14ac	KSTGGKAPR	486.2853++	H3_9-17	Ref2007_AS_26_181219	1	19.7608	157035500	precursor [M+1]	545525888
MS1_K9R17_K9me2_K14ac	KSTGGKAPR	486.2853++	H3_9-17	Ref2007_AS_27_181219	1	19.7609	159068300	precursor [M+1]	582795392
MS1_K9R17_K9me2_K14ac	KSTGGKAPR	486.2853++	H3_9-17	Ref2007_AS_28_181219	1	19.7006	110801800	precursor [M+1]	394147232
MS1_K9R17_K9me2_K14ac	KSTGGKAPR	486.2853++	H3_9-17	Ref2007_AS_29_181219	1	19.7006	157788900	precursor [M+1]	565339328
MS1_K9R17_K9me2_K14ac	KSTGGKAPR	486.2853++	H3_9-17	Ref2007_AS_30_181219	1	19.7407	154536600	precursor [M+1]	560684864
MS1_K9R17_K9me2_K14ac	KSTGGKAPR	486.2853++	H3_9-17	Ref2007_AS_31_181219	1	19.7809	101897900	precursor [M+1]	384839168
MS1_K9R17_K9me2_K14ac	KSTGGKAPR	486.2853++	H3_9-17	Ref2007_AS_32_181219	1	19.7407	84044480	precursor [M+1]	325702176
MS1_K9R17_K9me2_K14ac	KSTGGKAPR	486.2853++	H3_9-17	Ref2007_AS_33_181219	1	19.801	103061200	precursor [M+1]	385728992
MS1_K9R17_K9me2_K14ac	KSTGGKAPR	486.2853++	H3_9-17	Ref2007_AS_34_181219	1	19.6804	68968640	precursor [M+1]	259393296
MS1_K9R17_K9me2_K14ac	KSTGGKAPR	486.2853++	H3_9-17	Ref2007_AS_35_181219	1	19.7608	131632000	precursor [M+1]	456063456
MS1_K9R17_K9me2_K14ac	KSTGGKAPR	486.2853++	H3_9-17	Ref2007_AS_QC0_181219	1	19.8412	89214260	precursor [M+1]	308912224
MS1_K9R17_K9me2_K14ac	KSTGGKAPR	486.2853++	H3_9-17	Ref2007_AS_QC1_181219	1	19.801	82825340	precursor [M+1]	282978272
MS1_K9R17_K9me2_K14ac	KSTGGKAPR	486.2853++	H3_9-17	Ref2007_AS_QC2_181219	1	19.6804	100938500	precursor [M+1]	356068224
MS1_K9R17_K9me2_K14ac	KSTGGKAPR	486.2853++	H3_9-17	Ref2007_AS_QC3_181219	1	19.7206	109012300	precursor [M+1]	363587520
MS1_K9R17_K9me2_K14ac	KSTGGKAPR	486.2853++	H3_9-17	Ref2007_AS_QC4_181219	1	19.4995	233844	precursor [M+1]	47921376
MS1_K9R17_K9me2_K14ac	KSTGGKAPR	486.2853++	H3_9-17	Ref2007_AS_QC5_181219	1	19.6805	57839200	precursor [M+1]	197645408
MS1_K9R17_K9me2_K14ac	KSTGGKAPR	486.2853++	H3_9-17	blank_00	0.666667	48.2819	3544	precursor [M+2]	391861
MS1_K9R17_K9me2_K14ac	KSTGGKAPR	486.2853++	H3_9-17	blank_01	0.666667	47.7199	0	precursor [M+2]	401310
MS1_K9R17_K9me2_K14ac	KSTGGKAPR	486.2853++	H3_9-17	Ref2007_AS_01_181219	1	19.8011	74263500	precursor [M+2]	536252800
MS1_K9R17_K9me2_K14ac	KSTGGKAPR	486.2853++	H3_9-17	Ref2007_AS_02_181219	1	19.7809	57297870	precursor [M+2]	343869440
MS1_K9R17_K9me2_K14ac	KSTGGKAPR	486.2853++	H3_9-17	Ref2007_AS_03_181219	1	19.6804	29863830	precursor [M+2]	237175088
MS1_K9R17_K9me2_K14ac	KSTGGKAPR	486.2853++	H3_9-17	Ref2007_AS_04_181219	1	19.7609	55216290	precursor [M+2]	369998784
MS1_K9R17_K9me2_K14ac	KSTGGKAPR	486.2853++	H3_9-17	Ref2007_AS_05_181219	1	19.7809	80051540	precursor [M+2]	548720960
MS1_K9R17_K9me2_K14ac	KSTGGKAPR	486.2853++	H3_9-17	Ref2007_AS_06_181219	1	19.7206	45107340	precursor [M+2]	313894656
MS1_K9R17_K9me2_K14ac	KSTGGKAPR	486.2853++	H3_9-17	Ref2007_AS_07_181219	1	19.7206	43311250	precursor [M+2]	310846880
MS1_K9R17_K9me2_K14ac	KSTGGKAPR	486.2853++	H3_9-17	Ref2007_AS_08_181219	1	19.8011	89395150	precursor [M+2]	658222144
MS1_K9R17_K9me2_K14ac	KSTGGKAPR	486.2853++	H3_9-17	Ref2007_AS_09_181219	1	19.7207	44897470	precursor [M+2]	349043936
MS1_K9R17_K9me2_K14ac	KSTGGKAPR	486.2853++	H3_9-17	Ref2007_AS_10_181219	1	19.7407	69991300	precursor [M+2]	503249152
MS1_K9R17_K9me2_K14ac	KSTGGKAPR	486.2853++	H3_9-17	Ref2007_AS_11_181219	1	19.6603	36956960	precursor [M+2]	236040752
MS1_K9R17_K9me2_K14ac	KSTGGKAPR	486.2853++	H3_9-17	Ref2007_AS_12_181219	1	19.781	64280320	precursor [M+2]	460905024
MS1_K9R17_K9me2_K14ac	KSTGGKAPR	486.2853++	H3_9-17	Ref2007_AS_13_181219	1	19.7207	51521630	precursor [M+2]	395774976
MS1_K9R17_K9me2_K14ac	KSTGGKAPR	486.2853++	H3_9-17	Ref2007_AS_14_181219	1	19.7608	78293470	precursor [M+2]	651281536
MS1_K9R17_K9me2_K14ac	KSTGGKAPR	486.2853++	H3_9-17	Ref2007_AS_15_181219	1	19.7608	79132390	precursor [M+2]	553784512
MS1_K9R17_K9me2_K14ac	KSTGGKAPR	486.2853++	H3_9-17	Ref2007_AS_16_181219	1	19.8011	64175370	precursor [M+2]	517997184
MS1_K9R17_K9me2_K14ac	KSTGGKAPR	486.2853++	H3_9-17	Ref2007_AS_17_181219	1	19.781	70408210	precursor [M+2]	485128320
MS1_K9R17_K9me2_K14ac	KSTGGKAPR	486.2853++	H3_9-17	Ref2007_AS_18_181219	1	19.7408	50124300	precursor [M+2]	386264576
MS1_K9R17_K9me2_K14ac	KSTGGKAPR	486.2853++	H3_9-17	Ref2007_AS_19_181219	1	19.7005	25388490	precursor [M+2]	191353856
MS1_K9R17_K9me2_K14ac	KSTGGKAPR	486.2853++	H3_9-17	Ref2007_AS_20_181219	1	19.7408	60397290	precursor [M+2]	452087392
MS1_K9R17_K9me2_K14ac	KSTGGKAPR	486.2853++	H3_9-17	Ref2007_AS_21_181219	1	19.7207	42055220	precursor [M+2]	296279040
MS1_K9R17_K9me2_K14ac	KSTGGKAPR	486.2853++	H3_9-17	Ref2007_AS_22_181219	1	19.7408	34863680	precursor [M+2]	265311936
MS1_K9R17_K9me2_K14ac	KSTGGKAPR	486.2853++	H3_9-17	Ref2007_AS_23_181219	1	20.2096	92218660	precursor [M+2]	667428160
MS1_K9R17_K9me2_K14ac	KSTGGKAPR	486.2853++	H3_9-17	Ref2007_AS_24_181219	1	19.7407	77725760	precursor [M+2]	518444544
MS1_K9R17_K9me2_K14ac	KSTGGKAPR	486.2853++	H3_9-17	Ref2007_AS_25_181219	1	19.7809	73425310	precursor [M+2]	489740992
MS1_K9R17_K9me2_K14ac	KSTGGKAPR	486.2853++	H3_9-17	Ref2007_AS_26_181219	1	19.7608	75407480	precursor [M+2]	545525888
MS1_K9R17_K9me2_K14ac	KSTGGKAPR	486.2853++	H3_9-17	Ref2007_AS_27_181219	1	19.7609	83245590	precursor [M+2]	582795392
MS1_K9R17_K9me2_K14ac	KSTGGKAPR	486.2853++	H3_9-17	Ref2007_AS_28_181219	1	19.7006	55213590	precursor [M+2]	394147232
MS1_K9R17_K9me2_K14ac	KSTGGKAPR	486.2853++	H3_9-17	Ref2007_AS_29_181219	1	19.7006	77358710	precursor [M+2]	565339328
MS1_K9R17_K9me2_K14ac	KSTGGKAPR	486.2853++	H3_9-17	Ref2007_AS_30_181219	1	19.7407	79642790	precursor [M+2]	560684864
MS1_K9R17_K9me2_K14ac	KSTGGKAPR	486.2853++	H3_9-17	Ref2007_AS_31_181219	1	19.7809	55348010	precursor [M+2]	384839168
MS1_K9R17_K9me2_K14ac	KSTGGKAPR	486.2853++	H3_9-17	Ref2007_AS_32_181219	1	19.7407	47105370	precursor [M+2]	325702176
MS1_K9R17_K9me2_K14ac	KSTGGKAPR	486.2853++	H3_9-17	Ref2007_AS_33_181219	1	19.801	57617960	precursor [M+2]	385728992
MS1_K9R17_K9me2_K14ac	KSTGGKAPR	486.2853++	H3_9-17	Ref2007_AS_34_181219	1	19.6804	34780350	precursor [M+2]	259393296
MS1_K9R17_K9me2_K14ac	KSTGGKAPR	486.2853++	H3_9-17	Ref2007_AS_35_181219	1	19.7608	65098140	precursor [M+2]	456063456
MS1_K9R17_K9me2_K14ac	KSTGGKAPR	486.2853++	H3_9-17	Ref2007_AS_QC0_181219	1	19.8412	48508170	precursor [M+2]	308912224
MS1_K9R17_K9me2_K14ac	KSTGGKAPR	486.2853++	H3_9-17	Ref2007_AS_QC1_181219	1	19.801	42347390	precursor [M+2]	282978272
MS1_K9R17_K9me2_K14ac	KSTGGKAPR	486.2853++	H3_9-17	Ref2007_AS_QC2_181219	1	19.6804	53818820	precursor [M+2]	356068224
MS1_K9R17_K9me2_K14ac	KSTGGKAPR	486.2853++	H3_9-17	Ref2007_AS_QC3_181219	1	19.7206	53579410	precursor [M+2]	363587520
MS1_K9R17_K9me2_K14ac	KSTGGKAPR	486.2853++	H3_9-17	Ref2007_AS_QC4_181219	1	19.4995	9887125	precursor [M+2]	47921376
MS1_K9R17_K9me2_K14ac	KSTGGKAPR	486.2853++	H3_9-17	Ref2007_AS_QC5_181219	1	19.6805	29947520	precursor [M+2]	197645408
MS1_K9R17_K9me3	KSTGGKAPR	494.8025++	H3_9-17	blank_00	0.333333	19.5886	28255	precursor	28254.6
MS1_K9R17_K9me3	KSTGGKAPR	494.8025++	H3_9-17	blank_01	1	26.9968	210870	precursor	274809
MS1_K9R17_K9me3	KSTGGKAPR	494.8025++	H3_9-17	Ref2007_AS_01_181219	1	19.7609	1129586000	precursor	1881028352
MS1_K9R17_K9me3	KSTGGKAPR	494.8025++	H3_9-17	Ref2007_AS_02_181219	1	19.7407	860439500	precursor	1441422464
MS1_K9R17_K9me3	KSTGGKAPR	494.8025++	H3_9-17	Ref2007_AS_03_181219	1	19.6402	664795400	precursor	1113789824
MS1_K9R17_K9me3	KSTGGKAPR	494.8025++	H3_9-17	Ref2007_AS_04_181219	1	19.7207	704476500	precursor	1177129472
MS1_K9R17_K9me3	KSTGGKAPR	494.8025++	H3_9-17	Ref2007_AS_05_181219	1	19.7206	829833200	precursor	1382143872
MS1_K9R17_K9me3	KSTGGKAPR	494.8025++	H3_9-17	Ref2007_AS_06_181219	1	19.6804	674245900	precursor	1131509248
MS1_K9R17_K9me3	KSTGGKAPR	494.8025++	H3_9-17	Ref2007_AS_07_181219	1	19.6804	645615900	precursor	1071497856
MS1_K9R17_K9me3	KSTGGKAPR	494.8025++	H3_9-17	Ref2007_AS_08_181219	1	19.7408	1546591000	precursor	2597743616
MS1_K9R17_K9me3	KSTGGKAPR	494.8025++	H3_9-17	Ref2007_AS_09_181219	1	19.6805	854169500	precursor	1425765504
MS1_K9R17_K9me3	KSTGGKAPR	494.8025++	H3_9-17	Ref2007_AS_10_181219	1	19.7005	1007284000	precursor	1688529664
MS1_K9R17_K9me3	KSTGGKAPR	494.8025++	H3_9-17	Ref2007_AS_11_181219	1	19.6402	702175200	precursor	1165971456
MS1_K9R17_K9me3	KSTGGKAPR	494.8025++	H3_9-17	Ref2007_AS_12_181219	1	19.7609	947276000	precursor	1587767296
MS1_K9R17_K9me3	KSTGGKAPR	494.8025++	H3_9-17	Ref2007_AS_13_181219	1	19.7006	882335100	precursor	1467794048
MS1_K9R17_K9me3	KSTGGKAPR	494.8025++	H3_9-17	Ref2007_AS_14_181219	1	19.7005	1132183000	precursor	1885351808
MS1_K9R17_K9me3	KSTGGKAPR	494.8025++	H3_9-17	Ref2007_AS_15_181219	1	19.7005	1356445000	precursor	2273107712
MS1_K9R17_K9me3	KSTGGKAPR	494.8025++	H3_9-17	Ref2007_AS_16_181219	1	19.7408	1430964000	precursor	2395949568
MS1_K9R17_K9me3	KSTGGKAPR	494.8025++	H3_9-17	Ref2007_AS_17_181219	1	19.7408	809906400	precursor	1351873280
MS1_K9R17_K9me3	KSTGGKAPR	494.8025++	H3_9-17	Ref2007_AS_18_181219	1	19.7006	571738500	precursor	952672064
MS1_K9R17_K9me3	KSTGGKAPR	494.8025++	H3_9-17	Ref2007_AS_19_181219	1	19.6603	366699700	precursor	619009728
MS1_K9R17_K9me3	KSTGGKAPR	494.8025++	H3_9-17	Ref2007_AS_20_181219	1	19.7207	1269292000	precursor	2125041920
MS1_K9R17_K9me3	KSTGGKAPR	494.8025++	H3_9-17	Ref2007_AS_21_181219	1	19.6604	732211700	precursor	1222013312
MS1_K9R17_K9me3	KSTGGKAPR	494.8025++	H3_9-17	Ref2007_AS_22_181219	1	19.7006	659527600	precursor	1106800896
MS1_K9R17_K9me3	KSTGGKAPR	494.8025++	H3_9-17	Ref2007_AS_23_181219	1	20.1517	1415773000	precursor	2373772288
MS1_K9R17_K9me3	KSTGGKAPR	494.8025++	H3_9-17	Ref2007_AS_24_181219	1	19.7005	914116000	precursor	1523951104
MS1_K9R17_K9me3	KSTGGKAPR	494.8025++	H3_9-17	Ref2007_AS_25_181219	1	19.7407	1083352000	precursor	1804632448
MS1_K9R17_K9me3	KSTGGKAPR	494.8025++	H3_9-17	Ref2007_AS_26_181219	1	19.7206	965321300	precursor	1610892928
MS1_K9R17_K9me3	KSTGGKAPR	494.8025++	H3_9-17	Ref2007_AS_27_181219	1	19.7207	1105720000	precursor	1839159296
MS1_K9R17_K9me3	KSTGGKAPR	494.8025++	H3_9-17	Ref2007_AS_28_181219	1	19.6604	813704400	precursor	1361527936
MS1_K9R17_K9me3	KSTGGKAPR	494.8025++	H3_9-17	Ref2007_AS_29_181219	1	19.6403	856385300	precursor	1433191936
MS1_K9R17_K9me3	KSTGGKAPR	494.8025++	H3_9-17	Ref2007_AS_30_181219	1	19.7005	1376207000	precursor	2308763136
MS1_K9R17_K9me3	KSTGGKAPR	494.8025++	H3_9-17	Ref2007_AS_31_181219	1	19.7407	819782900	precursor	1365692928
MS1_K9R17_K9me3	KSTGGKAPR	494.8025++	H3_9-17	Ref2007_AS_32_181219	1	19.7005	574098600	precursor	959880832
MS1_K9R17_K9me3	KSTGGKAPR	494.8025++	H3_9-17	Ref2007_AS_33_181219	1	19.7608	797278900	precursor	1337146496
MS1_K9R17_K9me3	KSTGGKAPR	494.8025++	H3_9-17	Ref2007_AS_34_181219	1	19.6402	564572200	precursor	945294656
MS1_K9R17_K9me3	KSTGGKAPR	494.8025++	H3_9-17	Ref2007_AS_35_181219	1	19.7206	996018300	precursor	1670349440
MS1_K9R17_K9me3	KSTGGKAPR	494.8025++	H3_9-17	Ref2007_AS_QC0_181219	1	19.7809	825370000	precursor	1388029184
MS1_K9R17_K9me3	KSTGGKAPR	494.8025++	H3_9-17	Ref2007_AS_QC1_181219	1	19.7206	545081200	precursor	912703872
MS1_K9R17_K9me3	KSTGGKAPR	494.8025++	H3_9-17	Ref2007_AS_QC2_181219	1	19.6603	1002127000	precursor	1659297536
MS1_K9R17_K9me3	KSTGGKAPR	494.8025++	H3_9-17	Ref2007_AS_QC3_181219	1	19.7005	733455100	precursor	1221669888
MS1_K9R17_K9me3	KSTGGKAPR	494.8025++	H3_9-17	Ref2007_AS_QC4_181219	1	19.6201	540366700	precursor	905041472
MS1_K9R17_K9me3	KSTGGKAPR	494.8025++	H3_9-17	Ref2007_AS_QC5_181219	1	19.6403	402714200	precursor	671417792
MS1_K9R17_K9me3	KSTGGKAPR	494.8025++	H3_9-17	blank_00	0.333333	19.5886	0	precursor [M+1]	28254.6
MS1_K9R17_K9me3	KSTGGKAPR	494.8025++	H3_9-17	blank_01	1	26.9968	57748	precursor [M+1]	274809
MS1_K9R17_K9me3	KSTGGKAPR	494.8025++	H3_9-17	Ref2007_AS_01_181219	1	19.7609	574481000	precursor [M+1]	1881028352
MS1_K9R17_K9me3	KSTGGKAPR	494.8025++	H3_9-17	Ref2007_AS_02_181219	1	19.7407	439960100	precursor [M+1]	1441422464
MS1_K9R17_K9me3	KSTGGKAPR	494.8025++	H3_9-17	Ref2007_AS_03_181219	1	19.6402	344076600	precursor [M+1]	1113789824
MS1_K9R17_K9me3	KSTGGKAPR	494.8025++	H3_9-17	Ref2007_AS_04_181219	1	19.7207	358314100	precursor [M+1]	1177129472
MS1_K9R17_K9me3	KSTGGKAPR	494.8025++	H3_9-17	Ref2007_AS_05_181219	1	19.7206	420943400	precursor [M+1]	1382143872
MS1_K9R17_K9me3	KSTGGKAPR	494.8025++	H3_9-17	Ref2007_AS_06_181219	1	19.6804	346372400	precursor [M+1]	1131509248
MS1_K9R17_K9me3	KSTGGKAPR	494.8025++	H3_9-17	Ref2007_AS_07_181219	1	19.6804	325262700	precursor [M+1]	1071497856
MS1_K9R17_K9me3	KSTGGKAPR	494.8025++	H3_9-17	Ref2007_AS_08_181219	1	19.7408	800467800	precursor [M+1]	2597743616
MS1_K9R17_K9me3	KSTGGKAPR	494.8025++	H3_9-17	Ref2007_AS_09_181219	1	19.6805	441464000	precursor [M+1]	1425765504
MS1_K9R17_K9me3	KSTGGKAPR	494.8025++	H3_9-17	Ref2007_AS_10_181219	1	19.7005	521343100	precursor [M+1]	1688529664
MS1_K9R17_K9me3	KSTGGKAPR	494.8025++	H3_9-17	Ref2007_AS_11_181219	1	19.6402	350314000	precursor [M+1]	1165971456
MS1_K9R17_K9me3	KSTGGKAPR	494.8025++	H3_9-17	Ref2007_AS_12_181219	1	19.7609	488986500	precursor [M+1]	1587767296
MS1_K9R17_K9me3	KSTGGKAPR	494.8025++	H3_9-17	Ref2007_AS_13_181219	1	19.7006	450433300	precursor [M+1]	1467794048
MS1_K9R17_K9me3	KSTGGKAPR	494.8025++	H3_9-17	Ref2007_AS_14_181219	1	19.7005	572793300	precursor [M+1]	1885351808
MS1_K9R17_K9me3	KSTGGKAPR	494.8025++	H3_9-17	Ref2007_AS_15_181219	1	19.7005	705501900	precursor [M+1]	2273107712
MS1_K9R17_K9me3	KSTGGKAPR	494.8025++	H3_9-17	Ref2007_AS_16_181219	1	19.7408	734980900	precursor [M+1]	2395949568
MS1_K9R17_K9me3	KSTGGKAPR	494.8025++	H3_9-17	Ref2007_AS_17_181219	1	19.7408	412871700	precursor [M+1]	1351873280
MS1_K9R17_K9me3	KSTGGKAPR	494.8025++	H3_9-17	Ref2007_AS_18_181219	1	19.7006	290964200	precursor [M+1]	952672064
MS1_K9R17_K9me3	KSTGGKAPR	494.8025++	H3_9-17	Ref2007_AS_19_181219	1	19.6603	193589100	precursor [M+1]	619009728
MS1_K9R17_K9me3	KSTGGKAPR	494.8025++	H3_9-17	Ref2007_AS_20_181219	1	19.7207	654781200	precursor [M+1]	2125041920
MS1_K9R17_K9me3	KSTGGKAPR	494.8025++	H3_9-17	Ref2007_AS_21_181219	1	19.6604	372565200	precursor [M+1]	1222013312
MS1_K9R17_K9me3	KSTGGKAPR	494.8025++	H3_9-17	Ref2007_AS_22_181219	1	19.7006	343276100	precursor [M+1]	1106800896
MS1_K9R17_K9me3	KSTGGKAPR	494.8025++	H3_9-17	Ref2007_AS_23_181219	1	20.1517	729219400	precursor [M+1]	2373772288
MS1_K9R17_K9me3	KSTGGKAPR	494.8025++	H3_9-17	Ref2007_AS_24_181219	1	19.7005	462537000	precursor [M+1]	1523951104
MS1_K9R17_K9me3	KSTGGKAPR	494.8025++	H3_9-17	Ref2007_AS_25_181219	1	19.7407	549904500	precursor [M+1]	1804632448
MS1_K9R17_K9me3	KSTGGKAPR	494.8025++	H3_9-17	Ref2007_AS_26_181219	1	19.7206	495414700	precursor [M+1]	1610892928
MS1_K9R17_K9me3	KSTGGKAPR	494.8025++	H3_9-17	Ref2007_AS_27_181219	1	19.7207	563713700	precursor [M+1]	1839159296
MS1_K9R17_K9me3	KSTGGKAPR	494.8025++	H3_9-17	Ref2007_AS_28_181219	1	19.6604	420148100	precursor [M+1]	1361527936
MS1_K9R17_K9me3	KSTGGKAPR	494.8025++	H3_9-17	Ref2007_AS_29_181219	1	19.6403	440814200	precursor [M+1]	1433191936
MS1_K9R17_K9me3	KSTGGKAPR	494.8025++	H3_9-17	Ref2007_AS_30_181219	1	19.7005	711164200	precursor [M+1]	2308763136
MS1_K9R17_K9me3	KSTGGKAPR	494.8025++	H3_9-17	Ref2007_AS_31_181219	1	19.7407	418311700	precursor [M+1]	1365692928
MS1_K9R17_K9me3	KSTGGKAPR	494.8025++	H3_9-17	Ref2007_AS_32_181219	1	19.7005	291425400	precursor [M+1]	959880832
MS1_K9R17_K9me3	KSTGGKAPR	494.8025++	H3_9-17	Ref2007_AS_33_181219	1	19.7608	410454500	precursor [M+1]	1337146496
MS1_K9R17_K9me3	KSTGGKAPR	494.8025++	H3_9-17	Ref2007_AS_34_181219	1	19.6402	288528700	precursor [M+1]	945294656
MS1_K9R17_K9me3	KSTGGKAPR	494.8025++	H3_9-17	Ref2007_AS_35_181219	1	19.7206	511216900	precursor [M+1]	1670349440
MS1_K9R17_K9me3	KSTGGKAPR	494.8025++	H3_9-17	Ref2007_AS_QC0_181219	1	19.7809	431186000	precursor [M+1]	1388029184
MS1_K9R17_K9me3	KSTGGKAPR	494.8025++	H3_9-17	Ref2007_AS_QC1_181219	1	19.7206	278492900	precursor [M+1]	912703872
MS1_K9R17_K9me3	KSTGGKAPR	494.8025++	H3_9-17	Ref2007_AS_QC2_181219	1	19.6603	500864800	precursor [M+1]	1659297536
MS1_K9R17_K9me3	KSTGGKAPR	494.8025++	H3_9-17	Ref2007_AS_QC3_181219	1	19.7005	375317900	precursor [M+1]	1221669888
MS1_K9R17_K9me3	KSTGGKAPR	494.8025++	H3_9-17	Ref2007_AS_QC4_181219	1	19.6201	277553900	precursor [M+1]	905041472
MS1_K9R17_K9me3	KSTGGKAPR	494.8025++	H3_9-17	Ref2007_AS_QC5_181219	1	19.6403	204314900	precursor [M+1]	671417792
MS1_K9R17_K9me3	KSTGGKAPR	494.8025++	H3_9-17	blank_00	0.333333	19.5886	0	precursor [M+2]	28254.6
MS1_K9R17_K9me3	KSTGGKAPR	494.8025++	H3_9-17	blank_01	1	26.9968	6191	precursor [M+2]	274809
MS1_K9R17_K9me3	KSTGGKAPR	494.8025++	H3_9-17	Ref2007_AS_01_181219	1	19.7609	176960900	precursor [M+2]	1881028352
MS1_K9R17_K9me3	KSTGGKAPR	494.8025++	H3_9-17	Ref2007_AS_02_181219	1	19.7407	141022900	precursor [M+2]	1441422464
MS1_K9R17_K9me3	KSTGGKAPR	494.8025++	H3_9-17	Ref2007_AS_03_181219	1	19.6402	104917800	precursor [M+2]	1113789824
MS1_K9R17_K9me3	KSTGGKAPR	494.8025++	H3_9-17	Ref2007_AS_04_181219	1	19.7207	114338900	precursor [M+2]	1177129472
MS1_K9R17_K9me3	KSTGGKAPR	494.8025++	H3_9-17	Ref2007_AS_05_181219	1	19.7206	131367300	precursor [M+2]	1382143872
MS1_K9R17_K9me3	KSTGGKAPR	494.8025++	H3_9-17	Ref2007_AS_06_181219	1	19.6804	110891000	precursor [M+2]	1131509248
MS1_K9R17_K9me3	KSTGGKAPR	494.8025++	H3_9-17	Ref2007_AS_07_181219	1	19.6804	100619200	precursor [M+2]	1071497856
MS1_K9R17_K9me3	KSTGGKAPR	494.8025++	H3_9-17	Ref2007_AS_08_181219	1	19.7408	250685100	precursor [M+2]	2597743616
MS1_K9R17_K9me3	KSTGGKAPR	494.8025++	H3_9-17	Ref2007_AS_09_181219	1	19.6805	130132000	precursor [M+2]	1425765504
MS1_K9R17_K9me3	KSTGGKAPR	494.8025++	H3_9-17	Ref2007_AS_10_181219	1	19.7005	159902600	precursor [M+2]	1688529664
MS1_K9R17_K9me3	KSTGGKAPR	494.8025++	H3_9-17	Ref2007_AS_11_181219	1	19.6402	113482400	precursor [M+2]	1165971456
MS1_K9R17_K9me3	KSTGGKAPR	494.8025++	H3_9-17	Ref2007_AS_12_181219	1	19.7609	151504900	precursor [M+2]	1587767296
MS1_K9R17_K9me3	KSTGGKAPR	494.8025++	H3_9-17	Ref2007_AS_13_181219	1	19.7006	135025700	precursor [M+2]	1467794048
MS1_K9R17_K9me3	KSTGGKAPR	494.8025++	H3_9-17	Ref2007_AS_14_181219	1	19.7005	180375700	precursor [M+2]	1885351808
MS1_K9R17_K9me3	KSTGGKAPR	494.8025++	H3_9-17	Ref2007_AS_15_181219	1	19.7005	211161200	precursor [M+2]	2273107712
MS1_K9R17_K9me3	KSTGGKAPR	494.8025++	H3_9-17	Ref2007_AS_16_181219	1	19.7408	230004700	precursor [M+2]	2395949568
MS1_K9R17_K9me3	KSTGGKAPR	494.8025++	H3_9-17	Ref2007_AS_17_181219	1	19.7408	129095200	precursor [M+2]	1351873280
MS1_K9R17_K9me3	KSTGGKAPR	494.8025++	H3_9-17	Ref2007_AS_18_181219	1	19.7006	89969410	precursor [M+2]	952672064
MS1_K9R17_K9me3	KSTGGKAPR	494.8025++	H3_9-17	Ref2007_AS_19_181219	1	19.6603	58720930	precursor [M+2]	619009728
MS1_K9R17_K9me3	KSTGGKAPR	494.8025++	H3_9-17	Ref2007_AS_20_181219	1	19.7207	200968400	precursor [M+2]	2125041920
MS1_K9R17_K9me3	KSTGGKAPR	494.8025++	H3_9-17	Ref2007_AS_21_181219	1	19.6604	117236400	precursor [M+2]	1222013312
MS1_K9R17_K9me3	KSTGGKAPR	494.8025++	H3_9-17	Ref2007_AS_22_181219	1	19.7006	103997300	precursor [M+2]	1106800896
MS1_K9R17_K9me3	KSTGGKAPR	494.8025++	H3_9-17	Ref2007_AS_23_181219	1	20.1517	228780300	precursor [M+2]	2373772288
MS1_K9R17_K9me3	KSTGGKAPR	494.8025++	H3_9-17	Ref2007_AS_24_181219	1	19.7005	147298000	precursor [M+2]	1523951104
MS1_K9R17_K9me3	KSTGGKAPR	494.8025++	H3_9-17	Ref2007_AS_25_181219	1	19.7407	171376200	precursor [M+2]	1804632448
MS1_K9R17_K9me3	KSTGGKAPR	494.8025++	H3_9-17	Ref2007_AS_26_181219	1	19.7206	150157000	precursor [M+2]	1610892928
MS1_K9R17_K9me3	KSTGGKAPR	494.8025++	H3_9-17	Ref2007_AS_27_181219	1	19.7207	169725700	precursor [M+2]	1839159296
MS1_K9R17_K9me3	KSTGGKAPR	494.8025++	H3_9-17	Ref2007_AS_28_181219	1	19.6604	127675300	precursor [M+2]	1361527936
MS1_K9R17_K9me3	KSTGGKAPR	494.8025++	H3_9-17	Ref2007_AS_29_181219	1	19.6403	135992300	precursor [M+2]	1433191936
MS1_K9R17_K9me3	KSTGGKAPR	494.8025++	H3_9-17	Ref2007_AS_30_181219	1	19.7005	221391900	precursor [M+2]	2308763136
MS1_K9R17_K9me3	KSTGGKAPR	494.8025++	H3_9-17	Ref2007_AS_31_181219	1	19.7407	127598300	precursor [M+2]	1365692928
MS1_K9R17_K9me3	KSTGGKAPR	494.8025++	H3_9-17	Ref2007_AS_32_181219	1	19.7005	94356700	precursor [M+2]	959880832
MS1_K9R17_K9me3	KSTGGKAPR	494.8025++	H3_9-17	Ref2007_AS_33_181219	1	19.7608	129413000	precursor [M+2]	1337146496
MS1_K9R17_K9me3	KSTGGKAPR	494.8025++	H3_9-17	Ref2007_AS_34_181219	1	19.6402	92193740	precursor [M+2]	945294656
MS1_K9R17_K9me3	KSTGGKAPR	494.8025++	H3_9-17	Ref2007_AS_35_181219	1	19.7206	163114200	precursor [M+2]	1670349440
MS1_K9R17_K9me3	KSTGGKAPR	494.8025++	H3_9-17	Ref2007_AS_QC0_181219	1	19.7809	131473200	precursor [M+2]	1388029184
MS1_K9R17_K9me3	KSTGGKAPR	494.8025++	H3_9-17	Ref2007_AS_QC1_181219	1	19.7206	89129860	precursor [M+2]	912703872
MS1_K9R17_K9me3	KSTGGKAPR	494.8025++	H3_9-17	Ref2007_AS_QC2_181219	1	19.6603	156305200	precursor [M+2]	1659297536
MS1_K9R17_K9me3	KSTGGKAPR	494.8025++	H3_9-17	Ref2007_AS_QC3_181219	1	19.7005	112896900	precursor [M+2]	1221669888
MS1_K9R17_K9me3	KSTGGKAPR	494.8025++	H3_9-17	Ref2007_AS_QC4_181219	1	19.6201	87120880	precursor [M+2]	905041472
MS1_K9R17_K9me3	KSTGGKAPR	494.8025++	H3_9-17	Ref2007_AS_QC5_181219	1	19.6403	64388680	precursor [M+2]	671417792
MS1_K9R17_K9me3_K14ac	KSTGGKAPR	493.2931++	H3_9-17	blank_00	0.666667	49.8056	966991	precursor	1090745
MS1_K9R17_K9me3_K14ac	KSTGGKAPR	493.2931++	H3_9-17	blank_01	0.666667	87.9199	1237785	precursor	1.38589e+06
MS1_K9R17_K9me3_K14ac	KSTGGKAPR	493.2931++	H3_9-17	Ref2007_AS_01_181219	1	19.7609	71704440	precursor	130640040
MS1_K9R17_K9me3_K14ac	KSTGGKAPR	493.2931++	H3_9-17	Ref2007_AS_02_181219	1	19.7407	51650920	precursor	94660536
MS1_K9R17_K9me3_K14ac	KSTGGKAPR	493.2931++	H3_9-17	Ref2007_AS_03_181219	1	19.6402	47690770	precursor	88317440
MS1_K9R17_K9me3_K14ac	KSTGGKAPR	493.2931++	H3_9-17	Ref2007_AS_04_181219	1	19.7207	43987320	precursor	83375160
MS1_K9R17_K9me3_K14ac	KSTGGKAPR	493.2931++	H3_9-17	Ref2007_AS_05_181219	1	19.7407	53321340	precursor	99171552
MS1_K9R17_K9me3_K14ac	KSTGGKAPR	493.2931++	H3_9-17	Ref2007_AS_06_181219	1	19.7005	47602990	precursor	86085920
MS1_K9R17_K9me3_K14ac	KSTGGKAPR	493.2931++	H3_9-17	Ref2007_AS_07_181219	1	19.6804	41668910	precursor	78772552
MS1_K9R17_K9me3_K14ac	KSTGGKAPR	493.2931++	H3_9-17	Ref2007_AS_08_181219	1	19.7609	113260700	precursor	207386944
MS1_K9R17_K9me3_K14ac	KSTGGKAPR	493.2931++	H3_9-17	Ref2007_AS_09_181219	1	19.6805	55026940	precursor	101066184
MS1_K9R17_K9me3_K14ac	KSTGGKAPR	493.2931++	H3_9-17	Ref2007_AS_10_181219	1	19.7206	71839780	precursor	130226904
MS1_K9R17_K9me3_K14ac	KSTGGKAPR	493.2931++	H3_9-17	Ref2007_AS_11_181219	1	19.6402	48407030	precursor	87755296
MS1_K9R17_K9me3_K14ac	KSTGGKAPR	493.2931++	H3_9-17	Ref2007_AS_12_181219	1	19.7609	65405460	precursor	121797616
MS1_K9R17_K9me3_K14ac	KSTGGKAPR	493.2931++	H3_9-17	Ref2007_AS_13_181219	1	19.7006	55408040	precursor	102114256
MS1_K9R17_K9me3_K14ac	KSTGGKAPR	493.2931++	H3_9-17	Ref2007_AS_14_181219	1	19.7206	102751900	precursor	185729840
MS1_K9R17_K9me3_K14ac	KSTGGKAPR	493.2931++	H3_9-17	Ref2007_AS_15_181219	1	19.7206	100675900	precursor	177571664
MS1_K9R17_K9me3_K14ac	KSTGGKAPR	493.2931++	H3_9-17	Ref2007_AS_16_181219	1	19.7408	117156700	precursor	211616848
MS1_K9R17_K9me3_K14ac	KSTGGKAPR	493.2931++	H3_9-17	Ref2007_AS_17_181219	1	19.7408	62210070	precursor	114753080
MS1_K9R17_K9me3_K14ac	KSTGGKAPR	493.2931++	H3_9-17	Ref2007_AS_18_181219	1	19.7006	42052900	precursor	75934120
MS1_K9R17_K9me3_K14ac	KSTGGKAPR	493.2931++	H3_9-17	Ref2007_AS_19_181219	1	19.6603	24797700	precursor	44293596
MS1_K9R17_K9me3_K14ac	KSTGGKAPR	493.2931++	H3_9-17	Ref2007_AS_20_181219	1	19.7207	85168430	precursor	153765552
MS1_K9R17_K9me3_K14ac	KSTGGKAPR	493.2931++	H3_9-17	Ref2007_AS_21_181219	1	19.6805	46367340	precursor	85737360
MS1_K9R17_K9me3_K14ac	KSTGGKAPR	493.2931++	H3_9-17	Ref2007_AS_22_181219	1	19.7207	39411100	precursor	73846280
MS1_K9R17_K9me3_K14ac	KSTGGKAPR	493.2931++	H3_9-17	Ref2007_AS_23_181219	1	20.171	89461510	precursor	163167152
MS1_K9R17_K9me3_K14ac	KSTGGKAPR	493.2931++	H3_9-17	Ref2007_AS_24_181219	1	19.7206	52474880	precursor	93893544
MS1_K9R17_K9me3_K14ac	KSTGGKAPR	493.2931++	H3_9-17	Ref2007_AS_25_181219	1	19.7608	62906450	precursor	114235472
MS1_K9R17_K9me3_K14ac	KSTGGKAPR	493.2931++	H3_9-17	Ref2007_AS_26_181219	1	19.7206	56387050	precursor	102688376
MS1_K9R17_K9me3_K14ac	KSTGGKAPR	493.2931++	H3_9-17	Ref2007_AS_27_181219	1	19.7408	64195660	precursor	123039760
MS1_K9R17_K9me3_K14ac	KSTGGKAPR	493.2931++	H3_9-17	Ref2007_AS_28_181219	1	19.6604	50962020	precursor	92333776
MS1_K9R17_K9me3_K14ac	KSTGGKAPR	493.2931++	H3_9-17	Ref2007_AS_29_181219	1	19.6403	52936100	precursor	97791800
MS1_K9R17_K9me3_K14ac	KSTGGKAPR	493.2931++	H3_9-17	Ref2007_AS_30_181219	1	19.7005	78587580	precursor	143410400
MS1_K9R17_K9me3_K14ac	KSTGGKAPR	493.2931++	H3_9-17	Ref2007_AS_31_181219	1	19.7608	44437880	precursor	82493448
MS1_K9R17_K9me3_K14ac	KSTGGKAPR	493.2931++	H3_9-17	Ref2007_AS_32_181219	1	19.7206	34642460	precursor	63532264
MS1_K9R17_K9me3_K14ac	KSTGGKAPR	493.2931++	H3_9-17	Ref2007_AS_33_181219	1	19.7608	44568620	precursor	81409456
MS1_K9R17_K9me3_K14ac	KSTGGKAPR	493.2931++	H3_9-17	Ref2007_AS_34_181219	1	19.6603	32147780	precursor	58238736
MS1_K9R17_K9me3_K14ac	KSTGGKAPR	493.2931++	H3_9-17	Ref2007_AS_35_181219	1	19.7206	59778630	precursor	108560192
MS1_K9R17_K9me3_K14ac	KSTGGKAPR	493.2931++	H3_9-17	Ref2007_AS_QC0_181219	1	19.801	54314050	precursor	100899136
MS1_K9R17_K9me3_K14ac	KSTGGKAPR	493.2931++	H3_9-17	Ref2007_AS_QC1_181219	1	19.7206	29006530	precursor	54490272
MS1_K9R17_K9me3_K14ac	KSTGGKAPR	493.2931++	H3_9-17	Ref2007_AS_QC2_181219	1	19.6603	69566550	precursor	128594504
MS1_K9R17_K9me3_K14ac	KSTGGKAPR	493.2931++	H3_9-17	Ref2007_AS_QC3_181219	1	19.7005	52252320	precursor	97544600
MS1_K9R17_K9me3_K14ac	KSTGGKAPR	493.2931++	H3_9-17	Ref2007_AS_QC4_181219	1	19.6402	36651650	precursor	64706960
MS1_K9R17_K9me3_K14ac	KSTGGKAPR	493.2931++	H3_9-17	Ref2007_AS_QC5_181219	1	19.6604	26791630	precursor	49075432
MS1_K9R17_K9me3_K14ac	KSTGGKAPR	493.2931++	H3_9-17	blank_00	0.666667	49.8056	0	precursor [M+1]	1090745
MS1_K9R17_K9me3_K14ac	KSTGGKAPR	493.2931++	H3_9-17	blank_01	0.666667	87.9199	0	precursor [M+1]	1.38589e+06
MS1_K9R17_K9me3_K14ac	KSTGGKAPR	493.2931++	H3_9-17	Ref2007_AS_01_181219	1	19.7609	35192260	precursor [M+1]	130640040
MS1_K9R17_K9me3_K14ac	KSTGGKAPR	493.2931++	H3_9-17	Ref2007_AS_02_181219	1	19.7407	27206650	precursor [M+1]	94660536
MS1_K9R17_K9me3_K14ac	KSTGGKAPR	493.2931++	H3_9-17	Ref2007_AS_03_181219	1	19.6402	25589930	precursor [M+1]	88317440
MS1_K9R17_K9me3_K14ac	KSTGGKAPR	493.2931++	H3_9-17	Ref2007_AS_04_181219	1	19.7207	25474370	precursor [M+1]	83375160
MS1_K9R17_K9me3_K14ac	KSTGGKAPR	493.2931++	H3_9-17	Ref2007_AS_05_181219	1	19.7407	27962060	precursor [M+1]	99171552
MS1_K9R17_K9me3_K14ac	KSTGGKAPR	493.2931++	H3_9-17	Ref2007_AS_06_181219	1	19.7005	25606060	precursor [M+1]	86085920
MS1_K9R17_K9me3_K14ac	KSTGGKAPR	493.2931++	H3_9-17	Ref2007_AS_07_181219	1	19.6804	23280940	precursor [M+1]	78772552
MS1_K9R17_K9me3_K14ac	KSTGGKAPR	493.2931++	H3_9-17	Ref2007_AS_08_181219	1	19.7609	61215520	precursor [M+1]	207386944
MS1_K9R17_K9me3_K14ac	KSTGGKAPR	493.2931++	H3_9-17	Ref2007_AS_09_181219	1	19.6805	29161980	precursor [M+1]	101066184
MS1_K9R17_K9me3_K14ac	KSTGGKAPR	493.2931++	H3_9-17	Ref2007_AS_10_181219	1	19.7206	37699220	precursor [M+1]	130226904
MS1_K9R17_K9me3_K14ac	KSTGGKAPR	493.2931++	H3_9-17	Ref2007_AS_11_181219	1	19.6402	25257090	precursor [M+1]	87755296
MS1_K9R17_K9me3_K14ac	KSTGGKAPR	493.2931++	H3_9-17	Ref2007_AS_12_181219	1	19.7609	37470840	precursor [M+1]	121797616
MS1_K9R17_K9me3_K14ac	KSTGGKAPR	493.2931++	H3_9-17	Ref2007_AS_13_181219	1	19.7006	30200210	precursor [M+1]	102114256
MS1_K9R17_K9me3_K14ac	KSTGGKAPR	493.2931++	H3_9-17	Ref2007_AS_14_181219	1	19.7206	56480900	precursor [M+1]	185729840
MS1_K9R17_K9me3_K14ac	KSTGGKAPR	493.2931++	H3_9-17	Ref2007_AS_15_181219	1	19.7206	50579490	precursor [M+1]	177571664
MS1_K9R17_K9me3_K14ac	KSTGGKAPR	493.2931++	H3_9-17	Ref2007_AS_16_181219	1	19.7408	62220770	precursor [M+1]	211616848
MS1_K9R17_K9me3_K14ac	KSTGGKAPR	493.2931++	H3_9-17	Ref2007_AS_17_181219	1	19.7408	35278430	precursor [M+1]	114753080
MS1_K9R17_K9me3_K14ac	KSTGGKAPR	493.2931++	H3_9-17	Ref2007_AS_18_181219	1	19.7006	22151910	precursor [M+1]	75934120
MS1_K9R17_K9me3_K14ac	KSTGGKAPR	493.2931++	H3_9-17	Ref2007_AS_19_181219	1	19.6603	12112670	precursor [M+1]	44293596
MS1_K9R17_K9me3_K14ac	KSTGGKAPR	493.2931++	H3_9-17	Ref2007_AS_20_181219	1	19.7207	44222850	precursor [M+1]	153765552
MS1_K9R17_K9me3_K14ac	KSTGGKAPR	493.2931++	H3_9-17	Ref2007_AS_21_181219	1	19.6805	24008690	precursor [M+1]	85737360
MS1_K9R17_K9me3_K14ac	KSTGGKAPR	493.2931++	H3_9-17	Ref2007_AS_22_181219	1	19.7207	20308870	precursor [M+1]	73846280
MS1_K9R17_K9me3_K14ac	KSTGGKAPR	493.2931++	H3_9-17	Ref2007_AS_23_181219	1	20.171	45933660	precursor [M+1]	163167152
MS1_K9R17_K9me3_K14ac	KSTGGKAPR	493.2931++	H3_9-17	Ref2007_AS_24_181219	1	19.7206	25725870	precursor [M+1]	93893544
MS1_K9R17_K9me3_K14ac	KSTGGKAPR	493.2931++	H3_9-17	Ref2007_AS_25_181219	1	19.7608	30803920	precursor [M+1]	114235472
MS1_K9R17_K9me3_K14ac	KSTGGKAPR	493.2931++	H3_9-17	Ref2007_AS_26_181219	1	19.7206	28091520	precursor [M+1]	102688376
MS1_K9R17_K9me3_K14ac	KSTGGKAPR	493.2931++	H3_9-17	Ref2007_AS_27_181219	1	19.7408	35995540	precursor [M+1]	123039760
MS1_K9R17_K9me3_K14ac	KSTGGKAPR	493.2931++	H3_9-17	Ref2007_AS_28_181219	1	19.6604	26198930	precursor [M+1]	92333776
MS1_K9R17_K9me3_K14ac	KSTGGKAPR	493.2931++	H3_9-17	Ref2007_AS_29_181219	1	19.6403	27452970	precursor [M+1]	97791800
MS1_K9R17_K9me3_K14ac	KSTGGKAPR	493.2931++	H3_9-17	Ref2007_AS_30_181219	1	19.7005	39589040	precursor [M+1]	143410400
MS1_K9R17_K9me3_K14ac	KSTGGKAPR	493.2931++	H3_9-17	Ref2007_AS_31_181219	1	19.7608	23014030	precursor [M+1]	82493448
MS1_K9R17_K9me3_K14ac	KSTGGKAPR	493.2931++	H3_9-17	Ref2007_AS_32_181219	1	19.7206	17986250	precursor [M+1]	63532264
MS1_K9R17_K9me3_K14ac	KSTGGKAPR	493.2931++	H3_9-17	Ref2007_AS_33_181219	1	19.7608	22766460	precursor [M+1]	81409456
MS1_K9R17_K9me3_K14ac	KSTGGKAPR	493.2931++	H3_9-17	Ref2007_AS_34_181219	1	19.6603	15854520	precursor [M+1]	58238736
MS1_K9R17_K9me3_K14ac	KSTGGKAPR	493.2931++	H3_9-17	Ref2007_AS_35_181219	1	19.7206	28719300	precursor [M+1]	108560192
MS1_K9R17_K9me3_K14ac	KSTGGKAPR	493.2931++	H3_9-17	Ref2007_AS_QC0_181219	1	19.801	29804960	precursor [M+1]	100899136
MS1_K9R17_K9me3_K14ac	KSTGGKAPR	493.2931++	H3_9-17	Ref2007_AS_QC1_181219	1	19.7206	15808250	precursor [M+1]	54490272
MS1_K9R17_K9me3_K14ac	KSTGGKAPR	493.2931++	H3_9-17	Ref2007_AS_QC2_181219	1	19.6603	39115390	precursor [M+1]	128594504
MS1_K9R17_K9me3_K14ac	KSTGGKAPR	493.2931++	H3_9-17	Ref2007_AS_QC3_181219	1	19.7005	29731120	precursor [M+1]	97544600
MS1_K9R17_K9me3_K14ac	KSTGGKAPR	493.2931++	H3_9-17	Ref2007_AS_QC4_181219	1	19.6402	17455870	precursor [M+1]	64706960
MS1_K9R17_K9me3_K14ac	KSTGGKAPR	493.2931++	H3_9-17	Ref2007_AS_QC5_181219	1	19.6604	14096020	precursor [M+1]	49075432
MS1_K9R17_K9me3_K14ac	KSTGGKAPR	493.2931++	H3_9-17	blank_00	0.666667	49.8056	123754	precursor [M+2]	1090745
MS1_K9R17_K9me3_K14ac	KSTGGKAPR	493.2931++	H3_9-17	blank_01	0.666667	87.9199	148107	precursor [M+2]	1.38589e+06
MS1_K9R17_K9me3_K14ac	KSTGGKAPR	493.2931++	H3_9-17	Ref2007_AS_01_181219	1	19.7609	23743330	precursor [M+2]	130640040
MS1_K9R17_K9me3_K14ac	KSTGGKAPR	493.2931++	H3_9-17	Ref2007_AS_02_181219	1	19.7407	15802970	precursor [M+2]	94660536
MS1_K9R17_K9me3_K14ac	KSTGGKAPR	493.2931++	H3_9-17	Ref2007_AS_03_181219	1	19.6402	15036740	precursor [M+2]	88317440
MS1_K9R17_K9me3_K14ac	KSTGGKAPR	493.2931++	H3_9-17	Ref2007_AS_04_181219	1	19.7207	13913470	precursor [M+2]	83375160
MS1_K9R17_K9me3_K14ac	KSTGGKAPR	493.2931++	H3_9-17	Ref2007_AS_05_181219	1	19.7407	17888140	precursor [M+2]	99171552
MS1_K9R17_K9me3_K14ac	KSTGGKAPR	493.2931++	H3_9-17	Ref2007_AS_06_181219	1	19.7005	12876860	precursor [M+2]	86085920
MS1_K9R17_K9me3_K14ac	KSTGGKAPR	493.2931++	H3_9-17	Ref2007_AS_07_181219	1	19.6804	13822710	precursor [M+2]	78772552
MS1_K9R17_K9me3_K14ac	KSTGGKAPR	493.2931++	H3_9-17	Ref2007_AS_08_181219	1	19.7609	32910730	precursor [M+2]	207386944
MS1_K9R17_K9me3_K14ac	KSTGGKAPR	493.2931++	H3_9-17	Ref2007_AS_09_181219	1	19.6805	16877260	precursor [M+2]	101066184
MS1_K9R17_K9me3_K14ac	KSTGGKAPR	493.2931++	H3_9-17	Ref2007_AS_10_181219	1	19.7206	20687910	precursor [M+2]	130226904
MS1_K9R17_K9me3_K14ac	KSTGGKAPR	493.2931++	H3_9-17	Ref2007_AS_11_181219	1	19.6402	14091180	precursor [M+2]	87755296
MS1_K9R17_K9me3_K14ac	KSTGGKAPR	493.2931++	H3_9-17	Ref2007_AS_12_181219	1	19.7609	18921320	precursor [M+2]	121797616
MS1_K9R17_K9me3_K14ac	KSTGGKAPR	493.2931++	H3_9-17	Ref2007_AS_13_181219	1	19.7006	16506000	precursor [M+2]	102114256
MS1_K9R17_K9me3_K14ac	KSTGGKAPR	493.2931++	H3_9-17	Ref2007_AS_14_181219	1	19.7206	26497020	precursor [M+2]	185729840
MS1_K9R17_K9me3_K14ac	KSTGGKAPR	493.2931++	H3_9-17	Ref2007_AS_15_181219	1	19.7206	26316300	precursor [M+2]	177571664
MS1_K9R17_K9me3_K14ac	KSTGGKAPR	493.2931++	H3_9-17	Ref2007_AS_16_181219	1	19.7408	32239420	precursor [M+2]	211616848
MS1_K9R17_K9me3_K14ac	KSTGGKAPR	493.2931++	H3_9-17	Ref2007_AS_17_181219	1	19.7408	17264580	precursor [M+2]	114753080
MS1_K9R17_K9me3_K14ac	KSTGGKAPR	493.2931++	H3_9-17	Ref2007_AS_18_181219	1	19.7006	11729320	precursor [M+2]	75934120
MS1_K9R17_K9me3_K14ac	KSTGGKAPR	493.2931++	H3_9-17	Ref2007_AS_19_181219	1	19.6603	7383227	precursor [M+2]	44293596
MS1_K9R17_K9me3_K14ac	KSTGGKAPR	493.2931++	H3_9-17	Ref2007_AS_20_181219	1	19.7207	24374280	precursor [M+2]	153765552
MS1_K9R17_K9me3_K14ac	KSTGGKAPR	493.2931++	H3_9-17	Ref2007_AS_21_181219	1	19.6805	15361330	precursor [M+2]	85737360
MS1_K9R17_K9me3_K14ac	KSTGGKAPR	493.2931++	H3_9-17	Ref2007_AS_22_181219	1	19.7207	14126320	precursor [M+2]	73846280
MS1_K9R17_K9me3_K14ac	KSTGGKAPR	493.2931++	H3_9-17	Ref2007_AS_23_181219	1	20.171	27771980	precursor [M+2]	163167152
MS1_K9R17_K9me3_K14ac	KSTGGKAPR	493.2931++	H3_9-17	Ref2007_AS_24_181219	1	19.7206	15692790	precursor [M+2]	93893544
MS1_K9R17_K9me3_K14ac	KSTGGKAPR	493.2931++	H3_9-17	Ref2007_AS_25_181219	1	19.7608	20525100	precursor [M+2]	114235472
MS1_K9R17_K9me3_K14ac	KSTGGKAPR	493.2931++	H3_9-17	Ref2007_AS_26_181219	1	19.7206	18209810	precursor [M+2]	102688376
MS1_K9R17_K9me3_K14ac	KSTGGKAPR	493.2931++	H3_9-17	Ref2007_AS_27_181219	1	19.7408	22848560	precursor [M+2]	123039760
MS1_K9R17_K9me3_K14ac	KSTGGKAPR	493.2931++	H3_9-17	Ref2007_AS_28_181219	1	19.6604	15172830	precursor [M+2]	92333776
MS1_K9R17_K9me3_K14ac	KSTGGKAPR	493.2931++	H3_9-17	Ref2007_AS_29_181219	1	19.6403	17402740	precursor [M+2]	97791800
MS1_K9R17_K9me3_K14ac	KSTGGKAPR	493.2931++	H3_9-17	Ref2007_AS_30_181219	1	19.7005	25233780	precursor [M+2]	143410400
MS1_K9R17_K9me3_K14ac	KSTGGKAPR	493.2931++	H3_9-17	Ref2007_AS_31_181219	1	19.7608	15041530	precursor [M+2]	82493448
MS1_K9R17_K9me3_K14ac	KSTGGKAPR	493.2931++	H3_9-17	Ref2007_AS_32_181219	1	19.7206	10903550	precursor [M+2]	63532264
MS1_K9R17_K9me3_K14ac	KSTGGKAPR	493.2931++	H3_9-17	Ref2007_AS_33_181219	1	19.7608	14074370	precursor [M+2]	81409456
MS1_K9R17_K9me3_K14ac	KSTGGKAPR	493.2931++	H3_9-17	Ref2007_AS_34_181219	1	19.6603	10236430	precursor [M+2]	58238736
MS1_K9R17_K9me3_K14ac	KSTGGKAPR	493.2931++	H3_9-17	Ref2007_AS_35_181219	1	19.7206	20062260	precursor [M+2]	108560192
MS1_K9R17_K9me3_K14ac	KSTGGKAPR	493.2931++	H3_9-17	Ref2007_AS_QC0_181219	1	19.801	16780130	precursor [M+2]	100899136
MS1_K9R17_K9me3_K14ac	KSTGGKAPR	493.2931++	H3_9-17	Ref2007_AS_QC1_181219	1	19.7206	9675489	precursor [M+2]	54490272
MS1_K9R17_K9me3_K14ac	KSTGGKAPR	493.2931++	H3_9-17	Ref2007_AS_QC2_181219	1	19.6603	19912560	precursor [M+2]	128594504
MS1_K9R17_K9me3_K14ac	KSTGGKAPR	493.2931++	H3_9-17	Ref2007_AS_QC3_181219	1	19.7005	15561160	precursor [M+2]	97544600
MS1_K9R17_K9me3_K14ac	KSTGGKAPR	493.2931++	H3_9-17	Ref2007_AS_QC4_181219	1	19.6402	10599440	precursor [M+2]	64706960
MS1_K9R17_K9me3_K14ac	KSTGGKAPR	493.2931++	H3_9-17	Ref2007_AS_QC5_181219	1	19.6604	8187788	precursor [M+2]	49075432
MS2_K9R17_y7_K14noAc_731	KSTGGKAPR	495.2882++	H3_18-26	blank_00	0.5	29.7917	157310	precursor [M-1]	166780
MS2_K9R17_y7_K14noAc_731	KSTGGKAPR	495.2882++	H3_18-26	blank_01	0.5	56.127	0	precursor [M-1]	737057
MS2_K9R17_y7_K14noAc_731	KSTGGKAPR	495.2882++	H3_18-26	Ref2007_AS_01_181219	1	26.9978	5550270000	precursor [M-1]	9348843520
MS2_K9R17_y7_K14noAc_731	KSTGGKAPR	495.2882++	H3_18-26	Ref2007_AS_02_181219	1	26.7408	3436847000	precursor [M-1]	5831040512
MS2_K9R17_y7_K14noAc_731	KSTGGKAPR	495.2882++	H3_18-26	Ref2007_AS_03_181219	1	25.3294	2900931000	precursor [M-1]	4911163904
MS2_K9R17_y7_K14noAc_731	KSTGGKAPR	495.2882++	H3_18-26	Ref2007_AS_04_181219	1	26.4796	2681398000	precursor [M-1]	4547346432
MS2_K9R17_y7_K14noAc_731	KSTGGKAPR	495.2882++	H3_18-26	Ref2007_AS_05_181219	1	26.58	3464629000	precursor [M-1]	5889290240
MS2_K9R17_y7_K14noAc_731	KSTGGKAPR	495.2882++	H3_18-26	Ref2007_AS_06_181219	1	26.1177	2943935000	precursor [M-1]	4973300224
MS2_K9R17_y7_K14noAc_731	KSTGGKAPR	495.2882++	H3_18-26	Ref2007_AS_07_181219	1	25.7157	2892893000	precursor [M-1]	4894976000
MS2_K9R17_y7_K14noAc_731	KSTGGKAPR	495.2882++	H3_18-26	Ref2007_AS_08_181219	1	26.761	4328117000	precursor [M-1]	7335207424
MS2_K9R17_y7_K14noAc_731	KSTGGKAPR	495.2882++	H3_18-26	Ref2007_AS_09_181219	1	26.0977	2647589000	precursor [M-1]	4517761024
MS2_K9R17_y7_K14noAc_731	KSTGGKAPR	495.2882++	H3_18-26	Ref2007_AS_10_181219	1	26.5398	4998793000	precursor [M-1]	8469745664
MS2_K9R17_y7_K14noAc_731	KSTGGKAPR	495.2882++	H3_18-26	Ref2007_AS_11_181219	1	25.5304	2042995000	precursor [M-1]	3461568512
MS2_K9R17_y7_K14noAc_731	KSTGGKAPR	495.2882++	H3_18-26	Ref2007_AS_12_181219	1	26.8012	4384942000	precursor [M-1]	7402177536
MS2_K9R17_y7_K14noAc_731	KSTGGKAPR	495.2882++	H3_18-26	Ref2007_AS_13_181219	1	26.254	3548507000	precursor [M-1]	6034083840
MS2_K9R17_y7_K14noAc_731	KSTGGKAPR	495.2882++	H3_18-26	Ref2007_AS_14_181219	1	26.3589	5319447000	precursor [M-1]	8982723584
MS2_K9R17_y7_K14noAc_731	KSTGGKAPR	495.2882++	H3_18-26	Ref2007_AS_15_181219	1	26.3991	3997038000	precursor [M-1]	6774622208
MS2_K9R17_y7_K14noAc_731	KSTGGKAPR	495.2882++	H3_18-26	Ref2007_AS_16_181219	1	26.7409	4106375000	precursor [M-1]	6980512256
MS2_K9R17_y7_K14noAc_731	KSTGGKAPR	495.2882++	H3_18-26	Ref2007_AS_17_181219	1	26.5197	3323216000	precursor [M-1]	5633319424
MS2_K9R17_y7_K14noAc_731	KSTGGKAPR	495.2882++	H3_18-26	Ref2007_AS_18_181219	1	26.2742	3261428000	precursor [M-1]	5491791872
MS2_K9R17_y7_K14noAc_731	KSTGGKAPR	495.2882++	H3_18-26	Ref2007_AS_19_181219	1	25.7313	2095586000	precursor [M-1]	3545789696
[truncated: 12,535 more rows]

## Sheet: QuantMOD
	Histone_modifications	CTRL_1	CTRL_2	CTRL_3	CTRL_4	H2Av_1	H2Av_2	H2Av_3	H2Av_4	AB_1	AB_2	AB_3	AB_4	A_1	A_2	A_3	A_4	B_2	B_3	B_4	Tip60_1	Tip60_2	Tip60_3	Tip60_4	CTRL_Z_1	CTRL_Z_2	15min_1	15min_2	30min_1	30min_2	1h_1	1h_2	2h_1	2h_2	5h_1	5h_2
1	H3_Y41R49_noPTM	24595388416	14371557376	22459035648	11571005440	19088218112	16105914368	17240317952	11779402752	18304929792	27958466560	28131258368	19167641600	15204034560	18038202368	22007011328	16257166336	25815451648	24082348032	15038078976	24847071232	13771171840	17376198656	23945254912	12867830784	23322527744	23944615936	21910130688	24969576448	21897308160	29105068032	19851057152	19177263104	13446189056	26429474816	20764880896
2	H3_Y54R63_noPTM	15297727488	8137871360	14795769856	8206553088	11653641216	12157763584	14050666496	8898277376	15233763328	14465280000	21539397632	13178765312	10284787712	12631855104	16758437888	12184293376	20993517568	16882981888	9742563328	14905837568	10864840704	9192683520	12147222528	8112494080	15154560000	16358023168	13252730880	16057018368	17441835008	19370717184	11648557056	16326567936	10763214848	19147352064	13712379904
3	H3.3_noPTM	1651197056	1010760064	1461974656	1001196480	1422138880	1443459328	1410491520	964860032	1087274880	1221215232	1560738560	1061356160	878815680	1184289152	1359084032	1225940864	1920296960	1145434880	989400512	1404333440	825616896	1095627008	1215536128	915127296	1437074432	1539411968	1210544128	1624401280	1382292480	1729300864	1078187520	1498466432	1012767616	2066137600	1356119040
4	H3K14ac	0.265056	0.262912	0.265315	0.282169	0.241285	0.239637	0.241294	0.248541	0.250288	0.20726	0.251371	0.233505	0.242408	0.21022	0.240107	0.213649	0.256495	0.222634	0.24962	0.229754	0.219857	0.243733	0.233699	0.26246	0.250714	0.234453	0.247575	0.237275	0.252194	0.254728	0.26426	0.27328	0.367293	0.272894	0.373384
5	H3K18_noPTM	0.410605	0.405282	0.397882	0.386962	0.432256	0.411615	0.416407	0.434875	0.378503	0.421344	0.369142	0.399624	0.388725	0.397612	0.374637	0.402106	0.398121	0.387738	0.399686	0.383006	0.377997	0.362379	0.366306	0.400567	0.410233	0.408197	0.413173	0.409953	0.437011	0.403419	0.415224	0.405143	0.417347	0.398402	0.419474
6	H3K18ac	0.0147512	0.0169696	0.0153671	0.013147	0.016882	0.0190711	0.0198809	0.0180771	0.0103485	0.0150003	0.0119314	0.0140629	0.0102685	0.0157904	0.0136471	0.014817	0.0148581	0.0115835	0.0140995	0.0111793	0.0143591	0.0139795	0.012602	0.0178475	0.022082	0.0220608	0.0203913	0.0199819	0.0217919	0.0175476	0.0219212	0.0209293	0.0198633	0.0187635	0.0237347
7	H3K18acK23ac	0.0706451	0.074426	0.0766641	0.0793968	0.064761	0.072235	0.0739632	0.0687724	0.0653449	0.0601339	0.0703094	0.0655957	0.0732502	0.0677508	0.0817045	0.0682753	0.0712057	0.0681641	0.072474	0.0718194	0.0728023	0.0842006	0.0771928	0.0829778	0.0753267	0.078395	0.0760187	0.0764812	0.07172	0.0759693	0.0747115	0.0791191	0.0732097	0.0800292	0.0743541
8	H3K23ac	0.395854	0.388312	0.382515	0.373815	0.415375	0.392544	0.396526	0.416798	0.368155	0.406344	0.357211	0.385561	0.378456	0.381821	0.360989	0.387289	0.383263	0.376154	0.385586	0.371826	0.363638	0.348399	0.353704	0.382719	0.388151	0.386137	0.392782	0.389971	0.415219	0.385872	0.393303	0.384214	0.397484	0.379639	0.39574
9	H3K27_noPTM	0.0773003	0.0691363	0.0741993	0.075819	0.0746946	0.079843	0.0740344	0.0769764	0.0476886	0.036682	0.0385182	0.0406811	0.0520424	0.0486952	0.0530362	0.053419	0.0661189	0.0447728	0.0673355	0.05838	0.0501325	0.0551295	0.0466271	0.0885665	0.0794833	0.0830176	0.0790935	0.0881027	0.0827172	0.079111	0.0796335	0.0928287	0.0900352	0.0749131	0.0793084
10	H3K27me1	0.102936	0.0921642	0.0964234	0.0991167	0.0942043	0.109512	0.0952708	0.116444	0.0715889	0.0548523	0.0578029	0.0624649	0.0656912	0.0626409	0.0714937	0.0580673	0.0860453	0.0745406	0.0870365	0.0743548	0.0677601	0.066563	0.0576059	0.108416	0.0940349	0.102003	0.0984381	0.102003	0.102592	0.0992582	0.0959752	0.131806	0.118833	0.104715	0.102491
11	H3K27me2	0.502011	0.510861	0.500139	0.497183	0.506277	0.511162	0.511199	0.502495	0.514589	0.490247	0.50299	0.521645	0.503618	0.490592	0.487808	0.480929	0.517779	0.515123	0.509469	0.489434	0.494312	0.503876	0.485671	0.519156	0.527053	0.508503	0.524543	0.514312	0.535046	0.530344	0.52582	0.506995	0.524539	0.5376	0.530598
12	H3K27me2K36ac	0.00517353	0.00530957	0.00551165	0.00507546	0.00498651	0.00552234	0.00538319	0.00554309	0.00702737	0.00697647	0.00699988	0.00728414	0.0076398	0.00792289	0.00728349	0.00793183	0.00591877	0.00383571	0.00552635	0.00675563	0.00718813	0.00675554	0.00601905	0.00743051	0.00736042	0.00773933	0.00736836	0.00766839	0.00738883	0.0078513	0.0071721	0.00734262	0.00687895	0.00750355	0.00752849
13	H3K27me2K36me1	0.0349654	0.0305218	0.0343109	0.0316034	0.0337692	0.0340485	0.0313467	0.0317039	0.0368904	0.0426314	0.0429965	0.0375587	0.033368	0.0413429	0.0375617	0.0400862	0.0326401	0.0348948	0.0325078	0.0369756	0.0384417	0.0383917	0.0383484	0.0348253	0.0364396	0.0329767	0.0364884	0.035892	0.0324755	0.037046	0.0343147	0.0323489	0.03192	0.0359102	0.035499
14	H3K27me3	0.237547	0.251624	0.248548	0.249914	0.245939	0.222238	0.244242	0.231783	0.286323	0.331821	0.317652	0.297855	0.300128	0.314087	0.306547	0.322445	0.248528	0.289927	0.263249	0.29421	0.308348	0.286874	0.327935	0.199919	0.215276	0.218692	0.217559	0.205107	0.200195	0.199472	0.214595	0.184623	0.187141	0.19534	0.20309
15	H3K36me2	0.0133713	0.0123008	0.0119197	0.0142749	0.0133718	0.0131574	0.0139585	0.0119983	0.0109616	0.0103437	0.0107825	0.010714	0.00948634	0.00901459	0.011327	0.00956463	0.014232	0.010711	0.0132592	0.0127611	0.00971178	0.0128663	0.0138078	0.011599	0.0133955	0.0124484	0.0102424	0.0130542	0.0117183	0.0135519	0.0110748	0.0128936	0.0123048	0.0119472	0.0111418
17	H3K36me3	0.0266955	0.0280831	0.0289475	0.0270129	0.026758	0.0245165	0.0245649	0.0230572	0.0249312	0.0264469	0.0222586	0.0217967	0.028026	0.025704	0.0249433	0.027557	0.0287379	0.0261946	0.0216169	0.0271292	0.024106	0.0295443	0.0239863	0.0300873	0.0269566	0.0346204	0.0262673	0.0338605	0.027867	0.0333662	0.0314145	0.0311625	0.0283484	0.0320711	0.0303438
22	H3K79_noPTM	0.74619	0.749582	0.743747	0.717539	0.742065	0.743646	0.739052	0.746459	0.736945	0.713826	0.720741	0.712527	0.73663	0.727433	0.740941	0.730362	0.729858	0.716426	0.728448	0.728313	0.733031	0.730315	0.71887	0.760551	0.77073	0.747447	0.759122	0.750764	0.761839	0.751212	0.75913	0.758783	0.783117	0.754566	0.770573
23	H3K79me1	0.184774	0.18394	0.190167	0.195389	0.183683	0.195013	0.195981	0.187508	0.206841	0.20563	0.209694	0.215089	0.195316	0.202393	0.191276	0.208489	0.193366	0.209489	0.192227	0.199268	0.199838	0.194167	0.195375	0.178689	0.169153	0.182999	0.176721	0.180842	0.180161	0.180737	0.178186	0.190521	0.179476	0.186713	0.169544
24	H3K79me2	0.0690358	0.0664777	0.0660859	0.0870719	0.0742523	0.0613408	0.0649667	0.0660333	0.056214	0.0805439	0.069564	0.0723843	0.068053	0.0701739	0.0677833	0.0611492	0.0767765	0.0740846	0.0793254	0.0724194	0.0671308	0.0755187	0.0857544	0.0607603	0.0601178	0.0695541	0.0641574	0.0683938	0.0580005	0.0680505	0.0626845	0.0506966	0.037407	0.0587216	0.0598834
25	H3K9_noPTM	0.410502	0.411345	0.405857	0.393849	0.433579	0.428703	0.423371	0.440226	0.425769	0.432027	0.423896	0.432116	0.422115	0.431601	0.394708	0.444233	0.424468	0.425705	0.430801	0.418013	0.413603	0.409367	0.385423	0.436599	0.454737	0.443864	0.460419	0.451557	0.465475	0.459165	0.450496	0.465781	0.271139	0.467968	0.207252
26	H3K9ac	0.00932836	0.00865374	0.00850067	0.0101505	0.0082265	0.00748966	0.00822929	0.00922626	0.00766792	0.00611323	0.00783646	0.00752576	0.00859705	0.00558327	0.00728246	0.00702576	0.00850617	0.008678	0.00933744	0.00800319	0.00662406	0.00767443	0.00853372	0.00635736	0.00636082	0.0060886	0.00622564	0.00594085	0.0055527	0.00558012	0.00530682	0.00505072	0.00715832	0.00649802	0.00869648
27	H3K9acK14ac	0.0135403	0.0124902	0.0135535	0.0155208	0.0120134	0.00573204	0.012179	0.0131523	0.0121915	0.00938629	0.0122454	0.0111303	0.0112473	0.00864226	0.0057106	0.00522513	0.0126861	0.0127107	0.0128872	0.0107659	0.00927663	0.0115718	0.0121512	0.0110754	0.00740689	0.00983812	0.00995987	0.00945588	0.00995343	0.0100952	0.0029902	0.00484715	0.0135505	0.00326931	0.00670244
28	H3K9me1	0.0831838	0.0855498	0.079038	0.0798002	0.0795915	0.0953511	0.0809907	0.0912535	0.104056	0.0877593	0.0921983	0.0870905	0.0903342	0.111944	0.0932375	0.12341	0.0798024	0.0869132	0.0840016	0.0959615	0.102881	0.0867765	0.0842125	0.0823893	0.0796445	0.0840859	0.0859021	0.0881396	0.0783893	0.0852016	0.0837438	0.0581869	0.111436	0.0865961	0.108862
29	H3K9me1K14ac	0.0470578	0.0470764	0.0443826	0.0490231	0.0395539	0.0454025	0.0406919	0.0448338	0.0528548	0.0395759	0.0509187	0.0424795	0.0479988	0.049065	0.051053	0.0518599	0.04145	0.0469973	0.0420879	0.0492728	0.0471995	0.0470538	0.0433181	0.0405335	0.0358033	0.0376439	0.038058	0.0386736	0.0343028	0.0388118	0.0389136	0.0278064	0.0505647	0.0418369	0.0512867
30	H3K9me2	0.0968523	0.0883961	0.103404	0.0954483	0.10561	0.104112	0.111876	0.0906596	0.0716435	0.117618	0.0834122	0.0935739	0.0876675	0.0933581	0.0982031	0.0815037	0.105215	0.0916042	0.0936046	0.106056	0.104652	0.106734	0.129001	0.0959957	0.0947398	0.107235	0.0889092	0.105084	0.0964994	0.0878856	0.0900636	0.0976615	0.103691	0.0742294	0.144088
31	H3K9me2K14ac	0.0156755	0.0171301	0.0169775	0.0202127	0.0146587	0.0156524	0.0163828	0.0139057	0.0124463	0.0190547	0.0186893	0.015326	0.0203396	0.0166692	0.0202197	0.0135011	0.0154698	0.0173613	0.0142494	0.0222116	0.0151955	0.021647	0.0215912	0.0155931	0.0131373	0.015614	0.0132165	0.0154243	0.0139865	0.0134039	0.0137307	0.0143723	0.0154386	0.0125964	0.0203503
32	H3K9me3	0.0549852	0.0617495	0.0584855	0.0498521	0.0614459	0.0539543	0.0607581	0.0449835	0.0584488	0.0752016	0.0541024	0.07204	0.0647093	0.0680901	0.0829954	0.0556856	0.051905	0.0803033	0.0594443	0.0559477	0.0750611	0.0603222	0.076791	0.0459547	0.0540962	0.0575354	0.046902	0.0455468	0.0411129	0.0422994	0.0475979	0.049647	0.0562622	0.0319333	0.0745337
33	H3K9me3K14ac	0.0038188	0.00469794	0.00448642	0.00397353	0.00403525	0.00396652	0.00422694	0.00321882	0.00463467	0.0060036	0.00532974	0.00521273	0.00458331	0.0048266	0.00648347	0.00390694	0.00400314	0.00709261	0.00396615	0.00401436	0.00564937	0.00512042	0.00527842	0.00304164	0.00336022	0.00364206	0.00283307	0.00290344	0.00253304	0.00282983	0.0028979	0.00336688	0.00346627	0.00217892	0.00484413
34	H4_noPTM	0.803198	0.726519	0.717703	0.707889	0.747897	0.742682	0.750772	0.723683	0.784204	0.807179	0.770387	0.800984	0.78136	0.790529	0.772439	0.800576	0.723584	0.749163	0.735818	0.79253	0.794603	0.774591	0.783607	0.760496	0.76249	0.74052	0.756722	0.749324	0.740575	0.754765	0.740224	0.749986	0.737137	0.753012	0.762487
35	H4K12ac	0.0649177	0.0693877	0.0705684	0.0694444	0.0644644	0.0608411	0.0613067	0.0646288	0.0573443	0.0539893	0.060158	0.0524982	0.0521895	0.0497296	0.050687	0.0423198	0.0664599	0.0651673	0.0637126	0.0450284	0.0452937	0.0421563	0.0422169	0.0540977	0.0513332	0.058858	0.0566808	0.0561886	0.0555777	0.05682	0.0547302	0.0565345	0.055191	0.056726	0.049294
36	H4K12K16ac	0.00417159	0.0078598	0.00846699	0.00878616	0.00705041	0.00690429	0.00639963	0.00902575	0.0051554	0.00374179	0.00550285	0.00359246	0.00505377	0.00421657	0.00481233	0.00323892	0.00827314	0.00706864	0.00848638	0.00334501	0.00290541	0.00297716	0.00276358	0.00635625	0.00653317	0.00721394	0.00645409	0.00661109	0.00756643	0.00735054	0.00748989	0.00702589	0.00791258	0.00781633	0.00592734
37	H4K16ac	0.0249461	0.0329229	0.0318135	0.0334064	0.0270773	0.0267284	0.0275306	0.0278034	0.0315118	0.0297241	0.0352327	0.0294937	0.0335807	0.0315177	0.0345832	0.0312859	0.032664	0.0282943	0.0322559	0.0324221	0.0315122	0.0336316	0.0338302	0.0326357	0.0371334	0.0344128	0.0347716	0.0340387	0.0363365	0.0351859	0.0376855	0.0349668	0.0373283	0.0361225	0.0359789
38	H4K20_noPTM	0.0508394	0.0600803	0.0670932	0.064744	0.0635349	0.067215	0.0688583	0.060185	0.0366928	0.0349439	0.0482789	0.0380849	0.0438167	0.0460834	0.043264	0.0491171	0.0771379	0.0534387	0.0747626	0.0447894	0.0484446	0.0483356	0.0577736	0.0889407	0.098236	0.0979312	0.0961675	0.100872	0.102545	0.0997052	0.0868464	0.103316	0.101443	0.0920005	0.0890401
39	H4K20me1	0.347447	0.266896	0.250649	0.301137	0.273516	0.326714	0.292669	0.30986	0.289439	0.299621	0.285226	0.247079	0.283113	0.303529	0.279041	0.318728	0.280975	0.273797	0.357439	0.305985	0.28295	0.330002	0.261529	0.327835	0.273709	0.266561	0.348504	0.26075	0.229296	0.261609	0.311459	0.208323	0.260805	0.331326	0.26624
40	H4K20me2	0.601287	0.67255	0.681757	0.633715	0.662457	0.605676	0.638167	0.629681	0.673395	0.665048	0.666106	0.714503	0.672532	0.649905	0.677149	0.631727	0.641592	0.672377	0.567617	0.648853	0.66823	0.621226	0.680411	0.582807	0.627631	0.635087	0.554876	0.637924	0.667699	0.638251	0.601428	0.687955	0.637291	0.576276	0.644343
41	H4K20me3	0.000426229	0.00047358	0.000500354	0.000404079	0.000492223	0.000395896	0.000305831	0.000273206	0.000473654	0.000387404	0.000389203	0.000333513	0.00053881	0.000482312	0.000545368	0.000427804	0.000295242	0.000386796	0.000180855	0.000372229	0.000375778	0.000436111	0.000286575	0.000416836	0.000423557	0.000420816	0.000452757	0.000454318	0.000459856	0.000434711	0.000266488	0.000405587	0.000461035	0.000397609	0.000376348
42	H4K5ac	0.0366388	0.0462368	0.0484194	0.0506222	0.0415275	0.0446083	0.0412966	0.0445646	0.0368541	0.030981	0.0352926	0.0301389	0.0359102	0.0342954	0.0378296	0.0318736	0.0438642	0.0417459	0.0431521	0.0379089	0.0362699	0.040318	0.0375564	0.0351604	0.0402038	0.0379831	0.0385292	0.0401552	0.0374786	0.0444028	0.0387852	0.0402106	0.0404223	0.0410433	0.0367742
43	H4K5K12K16ac	9.62069e-05	0.00246009	0.00282774	0.00328185	0.00239357	0.00252937	0.00219388	0.00331007	0.00134002	0.000978735	0.00132314	0.000926478	0.00121362	0.00102175	0.00147719	0.000988463	0.00289852	0.00224336	0.00261247	0.00108263	0.00106718	0.00142448	0.00115023	0.00205385	5.40238e-05	0.00247352	0.000213836	0.00228583	0.00235105	0.000116633	0.00227669	0.00224248	0.00276821	0.000313593	0.00218268
44	H4K5K8ac	0.00381387	0.00794736	0.00838924	0.00824745	0.00714254	0.00796892	0.0073448	0.00848757	0.00627947	0.00538875	0.00711643	0.0061557	0.00645903	0.00618281	0.00713403	0.00629464	0.00814693	0.00842843	0.00736928	0.00594618	0.00620438	0.00727416	0.00736453	0.00719643	0.00839017	0.00804711	0.00798376	0.00722786	0.00748309	0.0073709	0.00770803	0.00651413	0.00820591	0.00733346	0.00803936
45	H4K5K8K12ac	0.000267194	0.00725049	0.00813293	0.0090544	0.00765757	0.00830746	0.00768008	0.00993335	0.00479337	0.00373016	0.00525288	0.00415158	0.00486794	0.00452681	0.00537915	0.00408452	0.00840408	0.00615785	0.00822664	0.00429049	0.00447736	0.00519395	0.00505198	0.00593764	0.00015395	0.00699421	0.000613145	0.0064105	0.00675498	0.000350775	0.00665004	0.00643035	0.00736482	0.000824139	0.00578836
46	H4K5K8K12K16ac	0.000322765	0.00399902	0.00371744	0.00505562	0.00493027	0.00532649	0.00417314	0.00721804	0.00189757	0.00148778	0.00210276	0.00144784	0.0015285	0.00164979	0.00187865	0.00138149	0.00557152	0.00508055	0.00491384	0.00136036	0.00149002	0.00162438	0.00160504	0.00362692	0.00362835	0.00484816	0.00424223	0.00446676	0.00482997	0.00464911	0.00493628	0.00480708	0.00601573	0.00479203	0.00444647
47	H4K5K8K16ac	4.42196e-05	0.00222074	0.00192252	0.00261228	0.00257402	0.00244275	0.00215138	0.00334772	0.00134881	0.00112188	0.00159128	0.00118535	0.00128283	0.0012994	0.00160721	0.00116442	0.00249544	0.00226546	0.00199411	0.00120843	0.00132966	0.00152985	0.00171843	0.00176241	4.21348e-05	0.00196682	0.000182387	0.00193205	0.0018784	9.87845e-05	0.00222474	0.00201556	0.00230325	0.000245897	0.00176911
48	H4K8ac	0.0287043	0.0307592	0.0334761	0.0316683	0.032103	0.0328675	0.033698	0.0339099	0.0291225	0.028831	0.0323698	0.0336053	0.0339457	0.0324967	0.0355781	0.0340157	0.0328387	0.0380596	0.03198	0.0310574	0.031805	0.0380726	0.0346833	0.040434	0.0400285	0.0389206	0.0406852	0.0353126	0.0417878	0.0346662	0.0396683	0.0340923	0.0370438	0.0387726	0.0378095
49	H4K8K12K16ac	8.02718e-05	0.00379592	0.00357896	0.00450253	0.00393035	0.00424338	0.00356635	0.00572949	0.00189471	0.00134981	0.00216197	0.00149247	0.00184218	0.00162639	0.00204947	0.00126755	0.00449812	0.00385871	0.00407372	0.00139474	0.00141152	0.00145598	0.00153887	0.0029708	7.53668e-05	0.00367739	0.000326306	0.00331649	0.00366085	0.00019341	0.00360063	0.00354936	0.00410892	0.000450562	0.00313647
